# Supplementary material for: Smoking and atherosclerotic cardiovascular disease risk in young men: the Korean Life Course Health Study
Source: PubMed Central journal article supplement — BMJ Open. 2019 Jun 12;9(6):e024453. doi: 10.1136/bmjopen-2018-024453 (PMC6575821; doi:10.1136/bmjopen-2018-024453), 2019-06-12
Supplement: bmjopen-2018-024453.draft_revisions.pdf [file bmjopen-2018-024453.draft_revisions.pdf]

# BMJ Open

BMJ Open is committed to open peer review. As part of this commitment we make the peer review history of every article we publish publicly available.

When an article is published we post the peer reviewers' comments and the authors' responses online. We also post the versions of the paper that were used during peer review. These are the versions that the peer review comments apply to.

The versions of the paper that follow are the versions that were submitted during the peer review process. They are not the versions of record or the final published versions. They should not be cited or distributed as the published version of this manuscript.

BMJ Open is an open access journal and the full, final, typeset and author-corrected version of record of the manuscript is available on our site with no access controls, subscription charges or pay-per-view fees (<http://bmjopen.bmj.com>).

If you have any questions on BMJ Open's open peer review process please email [editorial.bmjopen@bmj.com](mailto:editorial.bmjopen@bmj.com)

# BMJ Open

## Smoking is the first leading cause of Cardiovascular Disease in Young Men: The Korean Life Course Health Study

|                               |                                                                                                                                                                                                                                                                                                                                                                                                                                                                                                        |
|-------------------------------|--------------------------------------------------------------------------------------------------------------------------------------------------------------------------------------------------------------------------------------------------------------------------------------------------------------------------------------------------------------------------------------------------------------------------------------------------------------------------------------------------------|
| Journal:                      | <i>BMJ Open</i>                                                                                                                                                                                                                                                                                                                                                                                                                                                                                        |
| Manuscript ID                 | bmjopen-2018-024453                                                                                                                                                                                                                                                                                                                                                                                                                                                                                    |
| Article Type:                 | Research                                                                                                                                                                                                                                                                                                                                                                                                                                                                                               |
| Date Submitted by the Author: | 06-Jun-2018                                                                                                                                                                                                                                                                                                                                                                                                                                                                                            |
| Complete List of Authors:     | Jee, Yongho; Seoul National University, Department of Public Health<br>Jung, Keum Ji; Yonsei University Graduate School Institute for Health Promotion, Dept. of Public Health<br>Lee, Sunmi; National Health Insurance Service, Health Insurance Policy Research Institute<br>Back, Joung Hwan; Health Insurance Policy Research Institute<br>Jee, Sun Ha; Graduate School of Public Health, Yonsei University, Epidemiology<br>Cho, Sung-il ; Seoul National University, Department of Public Health |
| Keywords:                     | Smoking, Cardiovascular Disease, Young adults                                                                                                                                                                                                                                                                                                                                                                                                                                                          |
|                               |                                                                                                                                                                                                                                                                                                                                                                                                                                                                                                        |

SCHOLARONE™  
Manuscripts

Peer Review Only

Smoking is the first leading cause of Cardiovascular Disease in Young Men:

The Korean Life Course Health Study

Yongho Jee, MPH<sup>1,2</sup>, Keum Ji Jung, PhD<sup>2,4</sup>, Sunmi Lee, PhD<sup>3</sup>, Joung Hwan Back, PhD<sup>3</sup>,  
Sun Ha Jee, PhD<sup>2,4\*</sup>, Sung-il Cho, MD, PhD<sup>1\*</sup>

<sup>1</sup> Department of Public Health, Seoul National University, Seoul, Republic of Korea

<sup>2</sup> Institute for Health Promotion, Graduate School of Public Health, Yonsei University,  
Seoul, Republic of Korea

<sup>3</sup> Health Insurance Policy Research Institute, Wonju, Republic of Korea

<sup>4</sup> Department of Epidemiology and Health Promotion, Graduate School of Public Health,  
Yonsei University, Seoul, Republic of Korea

Running title: Smoking is the first leading cause of Cardiovascular Disease

\*These last authors contributed equally to this work

\*Corresponding authors. Department of Epidemiology and Health Promotion, Graduate  
School of Public Health, Yonsei University, Seoul, Republic of Korea.

E-mail address: [jsunha@yuhs.ac](mailto:jsunha@yuhs.ac) (S.H. Jee).

Department of Public Health, Seoul National University, Seoul, Republic of Korea

1  
2  
3  
4 E-mail address: [scho@snu.ac.kr](mailto:scho@snu.ac.kr) (S.I. Cho).  
5

6 These two authors equally contributed as corresponding author.  
7  
8  
9

10 Word count: 3828  
11

12 Table 3, Figure 4  
13  
14  
15  
16  
17  
18  
19  
20  
21  
22  
23  
24  
25  
26  
27  
28  
29  
30  
31  
32  
33  
34  
35  
36  
37  
38  
39  
40  
41  
42  
43  
44  
45  
46  
47  
48  
49  
50  
51  
52  
53

For peer review only

**Abstract**

**Objective:** To examine the effect of smoking on risk of atherosclerotic cardiovascular disease (ASCVD) in Korean young adults and to examine whether serum total cholesterol levels could modify the effect of smoking on ASCVD.

**Design:** A prospective cohort study within a national insurance system.

**Setting:** Health screenings provided by national insurance in 1992 and 1994.

**Participants:** 118,531 young men between 20 and 29 years of age and were followed up for 23 years.

**Outcome measure:** To assess the independent effects of smoking on the risk of Ischemic Heart Disease (IHD), stroke, and ASCVD, Cox proportional hazards regression models were used, controlling for age, hypertension, diabetes, hypercholesterolemia, and alcohol drinking.

**Results:** The total number of current smokers was 78,455 (66.2%), and 94,113 (79.7%) of the sample recorded a total cholesterol level < 200 mg/dl measured at baseline. Between 1993 and 2015, 2,786 cases of IHD (53/100,000 person year), 2,368 cases of stroke (45.4/100,000 person year), and 6,368 ASCVD (122.7/100,000 person year) occurred. The risk of IHD, stroke, and total ASCVD events was found to increase for current smokers, with a hazard ratios (HR) with 95% Confidence Interval (CI) of 1.5 (95% CI: 1.3,1.6), 1.4 (95% CI: 1.2,1.6), and 1.4 (95% CI: 1.3,1.5), respectively. Further, the risks above were also found throughout the range of serum levels of cholesterol.

1  
2  
3  
4 **Conclusions:** Smoking among Korean young adult men was independently associated  
5  
6 with increased risk of IHD, stroke and ASCVD. The concentration of cholesterol in  
7  
8 Korean men did not modify the effect of smoking on ASCVD.  
9

10  
11 **Keywords:** Smoking, Cardiovascular Disease, Young adults  
12  
13  
14  
15  
16  
17  
18  
19  
20  
21

### 22 **Strengths and limitations of this study**

23

- 24  
25 • Novel result from Korean young adults is that smoking is the first leading cause of  
26  
27 Cardiovascular Disease (CVD) while smoking is the second leading cause of CVD in  
28  
29 middle aged adults.  
30
- 31  
32 • The large sample size of cohort with 118,531 young men between 20 and 29 years of  
33  
34 age and were followed up for 23 years.  
35
- 36  
37 • The limitations of this study include possible measurement errors and the non-random  
38  
39 sample used.  
40  
41  
42  
43  
44  
45  
46  
47  
48  
49  
50  
51  
52  
53  
54

## INTRODUCTION

Atherosclerotic cardiovascular diseases (ASCVD) are the leading cause of death globally, with more people dying from ASCVD than any other causes of death annually. A total of 17.7 million people died as a result of ASCVDs in 2015 globally, comprising 31% of all deaths. Of these deaths, 7.4 million are estimated to have been the result of coronary heart disease, whilst 6.7 million were due to stroke (WHO). According to previous studies published in the western countries, tobacco use has been reported to be a major risk factor for ASCVD following hypertension.<sup>1</sup>

A growing concern is that for young adults, cigarette smoking may be the first leading cause of ASCVD, owing to the high prevalence of cigarette smoking in comparison to lower levels of alternate risk factors, including hypertension, diabetes, and high cholesterol levels. However, despite these observations, there remain only a small number of studies considering the relationship between smoking and ASCVD in Korea and other countries in East Asia.<sup>2-5</sup>

Further, comparisons with Western populations may be less informative owing to the relatively lower levels of cholesterol commonly present in Asian countries. Biological studies have explored the interaction between smoking and serum cholesterol levels.<sup>6-9</sup> Nevertheless, very few studies have analyzed the interaction effects of smoking and serum cholesterol on ASCVD in young adults

‘World No Tobacco Day 2018’ is a campaign, with the primary objective of raising awareness of the link between tobacco use and negative health outcomes, predominantly heart and other cardiovascular diseases (CVD) including stroke. It will

1  
2  
3  
4 also seek to expand the range of potential strategies key public actors such as  
5  
6 governmental and public bodies can take to reduce the health risks of tobacco use. If  
7  
8 there is an established link between tobacco smoking in young adults and CVD, the  
9  
10 campaign will further increase awareness on smoking in young adults. The government  
11  
12 and the public can then subsequently take actions to reduce risks of smoking at earlier  
13  
14 stage. Unfortunately, however, the association between smoking and CVD in young  
15  
16 adults has not received much attention because at least a long term (over 20 years)  
17  
18 follow-up study is needed. This serves as motivation for this study, in which we aimed  
19  
20 to examine the effect of smoking on risk of ASCVD in Korean young adults with  
21  
22 relatively low serum cholesterol levels. We also investigated whether the effect of  
23  
24 smoking can be modified by serum levels of cholesterol.  
25  
26  
27  
28  
29  
30

## 31 **METHOD**

### 32 **Study participants**

33  
34  
35  
36 In Korea, the Korean Medical Insurance Corporation (KMIC) provided health insurance  
37  
38 for private school staff and civil servants prior to the current insurance system, under  
39  
40 which it was integrated as National Health Insurance.<sup>2</sup> A total of 4,862,438 (10.7%) of  
41  
42 the Korean population were covered by KMIC insurance, of which 1,297,833 were  
43  
44 employees, and 3,364,605 were dependents. All insured participants are required to  
45  
46 participate in a biennial health checkup.<sup>2</sup> Approximately 94% of the insured participants  
47  
48 in 1992 and 1994 were examined biennially. We established a prospective cohort for  
49  
50 participants (aged 20-29) who routinely responded to the questionnaire on disease risk  
51  
52  
53  
54



1  
2  
3  
4 factors and chronic diseases, naming this study the Korean Life Course Health Study  
5 (KLCHS). The KLCHS cohort included 307,041 Koreans (142,461 males, 164,580  
6 females) who were screened by KMIC in 1992 and 1994. Of these participants, 205,840  
7 (67.0%) were registered in 1992 and 101,201 (33.0%) were registered in 1994.  
8  
9

10  
11  
12  
13 Of these 307,041 participants, 71,760 (23.4%) who had incomplete data height, blood  
14 pressure, fasting glucose, total cholesterol, or body mass index were excluded. We also  
15 excluded 6,170 people from our analysis who reported a past history of cancer and  
16 ASCVD, as well as 2,091 people who had missing information on smoking, exercise, or  
17 alcohol drinking, and 65 people who died before start of follow-up. Female participants  
18 were excluded, because of the low prevalence of smoking for females in Korea,  
19 resulting in a total of 118,531 eligible participants for the analysis (Figure 1). The study  
20 proposal obtained an approval by the Institutional Review Board of Human Research,  
21 Yonsei University (4-2001-0029). This study was a retrospective cohort using past  
22 routine laboratory data and did not receive consent.  
23  
24  
25  
26  
27  
28  
29  
30  
31  
32  
33  
34  
35  
36  
37

### 38 **Data collection**

39  
40  
41 The biennial KMIC screening was provided at local hospitals by medical practitioners  
42 according to standard protocols. During the two-year interval examination from 1992 to  
43 2008, we examined the variables related to the lifestyle of participants, such as daily  
44 smoking amount, duration of smoking, and variables related to drinking. From data  
45 collected at baseline, participants were defined as 'current smokers' if they were  
46 smoking currently, 'never smokers' if they had no prior history of smoking, and 'ex-  
47  
48  
49  
50  
51  
52  
53  
54

1  
2  
3  
4 smokers' if they had previously smoked but at the time of measurement did not smoke.  
5  
6 Current smokers were further categorized by amount of cigarettes consumed on average  
7  
8 per day (1–9, 10–19, and 20 or greater) as well as duration of smoking (1–9, 10–19, and  
9  
10 20 or more years) following the example of previous studies.<sup>2,10,11</sup>  
11

12  
13 The definition of hypertension was a systolic BP  $\geq$  140 mmHg or diastolic BP  $\geq$  90  
14  
15 mmHg.<sup>12</sup> Body mass index (BMI) was measured as weight (kg) / height (m)<sup>2</sup>. Serum  
16  
17 total cholesterol was grouped as desirable (<200 mg/dl), borderline-high (200-239  
18  
19 mg/dl), and high ( $\geq$ 240 mg/dl).<sup>13</sup> Definition of diabetes was fasting blood glucose  $\geq$   
20  
21 126 mg / dl.<sup>14</sup>  
22  
23  
24  
25  
26  
27  
28

### 29 **Follow-up and outcomes**

30  
31  
32 The main outcome variables used in the analysis were morbidity and mortality  
33  
34 categorized by IHD, stroke, and ASCVD. For IHD, alone (ICD 10 codes, I20–I25),  
35  
36 acute myocardial infarction (AMI) alone (I21), and angina pectoris (AP) alone (ICD 10  
37  
38 codes, I20) are used. For stroke, stroke alone (I60-I69) was used. Finally, with regard to  
39  
40 ASCVD, we used total ASCVD, including disease of hypertensive (I10–I15), ischemic  
41  
42 heart disease (I20–I25), all stroke (I60–I69), other heart disease (I44–I51), sudden death  
43  
44 (R96), and other vascular disease (I70–I74).  
45  
46

47  
48 The study outcomes were identified through diagnosis information recorded in hospital  
49  
50 admission, and from causes of death using death certificates. The study follow-up was  
51  
52 nearly 100% complete, as we were able to search ASCVD event data electronically by  
53  
54

1  
2  
3  
4 KMIC registrants regarding the morbidity information of ASCVD. The period of  
5  
6 follow-up was 23 years from January 1st, 1993 to December 31st, 2015. Data on causes  
7  
8 of death were available during years 1993–2015, and incidence could be tracked during  
9  
10 years 1995–2015.

11  
12  
13 A validation study was conducted by 20 internists from the Korean Society of  
14  
15 Cardiology in 2009.<sup>15</sup> For the participants who provided written permission for the use  
16  
17 of their personal information, 673 CHD events between 1994 and 2007 were confirmed  
18  
19 with individual hospital medical records, showing that 73% of designated myocardial  
20  
21 infarctions were valid. The validation study was updated in 2013 with a value of 93%.<sup>16</sup>  
22  
23  
24 The validation study on mortality data has not been conducted.

### 30 **Statistical analysis**

31  
32  
33 First, we examined relationships between smoking status and established ASCVD risk  
34  
35 factors at baseline. In considering continuous ASCVD risk factors, we used ordinary  
36  
37 least squares regression and coded smoking quantity as an ordinal variable. In this study,  
38  
39 the Mantel Haenszel method was applied for dichotomous variables.<sup>17</sup>

40  
41  
42 To assess the independent effects of smoking on the risk of IHD, stroke, and ASCVD,  
43  
44 Cox proportional hazards models were used, controlling for age and the confounding  
45  
46 variables such as hypertension, diabetes, high cholesterol, and alcohol drinking. The  
47  
48 proportional assumption was also tested utilizing Schoenfeld residuals, and the survival  
49  
50 curve according to smoking status was plotted using the life-table method. We used  
51  
52 Levins formula for calculating population attributable risk (PAR).<sup>18</sup> In additional

1  
2  
3  
4 analyses, we excluded all events that had occurred in the first 4 years of follow-up.  
5  
6 These analyses ensured sensitivity in our results. In all analyses, a two-sided  
7  
8 significance level of 0.05 was used.  
9

### 14 **Patient and Public Involvement**

15  
16  
17 Patients and or public were not involved.  
18  
19  
20  
21  
22  
23

### 24 **RESULTS**

25  
26 The average age of the study participants was  $26.7 \pm 2.0$  (SD) years. Among the  
27  
28 118,531 men, 78,455 (66.2%) were current smokers, 15,126 (12.8%) were ex-smokers,  
29  
30 and 92,403 (78%) had hypertension. For total cholesterol, 94,413 (79.7%) had a total  
31  
32 serum cholesterol level  $< 200$  mg/dL, 19,764 (16.6%) had a borderline level of 200-240  
33  
34 mg/dL, and 4,444 (3.8%) had a level of 240 mg/dL or higher. In terms of amount of  
35  
36 smoking, 28.9% smoked more than 20 cigarettes per day while 45.5% and 25.6% of  
37  
38 current smokers smoked 1 to 9 and 10 to 19 cigarettes per day, respectively. Among  
39  
40 current smokers, 92.0% smoked for less than 10 years while 7.6% and 0.4% of current  
41  
42 smokers smoked for 10 to 19 years and more than 20 years, respectively.  
43  
44  
45

46  
47 Population characteristics by smoking status are presented in Table 1. After adjusting  
48  
49 for age, current smokers had a significantly higher body mass index (P for trend =  
50  
51 0.0056), higher consumption of alcohol drinking (P for trend  $< .0001$ ), and higher  
52  
53 prevalence of diabetes (P for trend = 0.0060) than nonsmokers.  
54

1  
2  
3  
4 During 23 years of follow up (5,191,823 person-years), 2,786 (90 fatal) IHD cases  
5 (53/100,000 person year), stroke cases 2,368 (126 fatal) (45.4/100,000 person year),  
6 and 6,368 ASCVD cases (306 fatal) (122.7/100,000 person year) occurred  
7  
8  
9

10  
11 The independent effects of smoking on IHD, stroke, and ASCVD were analyzed  
12 controlling for confounding factors through Cox proportional hazards models, as shown  
13 in Table 2. The hazard ratios (HR) relating to IHD for current smokers were 1.5 (P  
14 <.0001), and those of ex-smokers were 1.0 (P <.0001). The HR of stroke was 1.4 (P  
15 <.0001) for current smokers and 1.1 (P = 0.5008) on ex-smokers.  
16  
17  
18  
19  
20  
21

22  
23 Compared to nonsmokers, the HR for any ASCVD event was 1.4 (P < 0.0001) in  
24 current smokers and 1.1 in ex-smokers (P = 0.1406). Figure 2 shows the survival  
25 probability by smoking history (never, former, 1-9, 10-19, ≥20 cigarette per day among  
26 current smokers) and the corresponding unadjusted association with ASCVD. The  
27 overall results demonstrated that smoking among young men increased the risk for  
28 ASCVD relative to nonsmokers. After adjusting for age and traditional ASCVD risk  
29 factors, the HRs for IHD and stroke were estimated for groups classified by amount of  
30 smoking (A and B in Figure 3) and duration of smoking (C and D in Figure 3). For IHD  
31 and stroke, the risk of events increased linearly with higher amount of cigarette per day  
32 (P for trend, <.0001 and <.0001, respectively) and longer duration of smoking (P for  
33 trend, <.0001 and <.0001, respectively).  
34  
35  
36  
37  
38  
39  
40  
41  
42  
43  
44  
45  
46  
47

48 To examine whether serum total cholesterol levels could modify the effect of smoking  
49 on ASCVD, we divided the cohort participants into quartile of total cholesterol. The  
50 risks above were also found throughout the range of serum levels of cholesterol  
51  
52  
53  
54

1  
2  
3  
4 demonstrating that serum total cholesterol levels did not modify the effect of smoking  
5  
6 on ASCVD (Figure 4).  
7

8  
9 Estimated risk factor prevalence in current studies of smoking and other additional risk  
10  
11 factors were used to estimate the PARs for IHD alone, stroke alone and total ASCVD  
12  
13 (Table 3). For IHD, current smoking accounts for about 24.9% of events, and  
14  
15 hypertension accounts for 8.1% of events. In the case of stroke, smoking was estimated  
16  
17 to account for 20.9%, whilst hypertension was estimated to be responsible for 13.3% of  
18  
19 stroke cases.  
20  
21

## 22 23 24 25 **DISCUSSION**

26  
27 Our study investigated the association between smoking and risk of ASCVD among  
28  
29 Korean young men within a cohort study with a 23 year of follow-up. To our  
30  
31 knowledge, this is the first study focusing on Korean young adults. In our study,  
32  
33 smoking was the most crucial risk factor attributing to 20% of ASCVD mortality in  
34  
35 middle age.  
36  
37

38  
39 Diabetes, hypertension, and hyperlipidemia are well known risk factors for ASCVD<sup>10</sup>.  
40  
41 However, for young adults with relatively low incidence of diabetes, hypertension and  
42  
43 hyperlipidemia, smoking is the most important and an independent risk factor for  
44  
45 predicting ASCVD in the present study. Furthermore, the high smoking rate among  
46  
47 young people is important with respect to the development of middle-aged hypertension  
48  
49 and transition to ASCVD.<sup>19-20</sup> Thus, middle-aged ASCVD morbidity is likely  
50  
51 predominantly predicted by smoking in young adulthood.  
52  
53

1  
2  
3  
4 The body of research centered upon the health effects of smoking is steadily increasing,  
5  
6 with findings reported from many countries around the world. However, few studies  
7  
8 have examined the effect of smoking on ASCVD in young adults.<sup>21</sup> Here, we present  
9  
10 evidence that current smoking is an independent risk factor affecting the incidence of  
11  
12 IHD, stroke and ASCVD.  
13

14  
15 These risk associations have been estimated across total serum cholesterol groups. A  
16  
17 cohort study in Hasayama Japan found that smoking showed positive association with  
18  
19 coronary heart disease in people with high levels of serum cholesterol above 180 mg /  
20  
21 dl, but not with people with low level of cholesterol less than 180 mg / dl].<sup>22-23</sup>  
22  
23 Afterward, six epidemiological studies were conducted. Among them, one study from  
24  
25 Puerto Rico Heart Health Program<sup>24</sup> showed similar results, but not all.<sup>7-11</sup> Of course,  
26  
27 all studies were conducted among adult populations. To the best of our knowledge, no  
28  
29 study has been done on young adults with much lower levels of serum cholesterol. In  
30  
31 addition, the high smoking rate among young adults is likely to be, even directly, linked  
32  
33 to high blood pressure among the adult population who developed ASCVD as a major  
34  
35 health problem.  
36  
37

38  
39  
40 In our analysis, there was no observed increase in risk of IHD or stroke among ex-  
41  
42 smokers. That is, the risk of ASCVD in ex-smokers was similar with that of  
43  
44 nonsmokers. These findings suggest that the risk of IHD lasts for an unknown period,  
45  
46 while the high risk for ASCVD decreases after smoking cessation.  
47  
48

49  
50 There are several studies regarding cardiovascular risk among young people. According  
51  
52 to a study conducted by Bernaards et al.,<sup>25</sup> blood pressure and waist circumference were  
53  
54

1  
2  
3  
4 decreased by lowering weekly tobacco consumption in younger participants. However,  
5  
6 they did not report the risk of developing cardiovascular disease events due to changes  
7  
8 in smoking. This seems to be another significant topic relating to the health of young  
9  
10 adults. Another study conducted by Morotti et al.<sup>21</sup> on young women with polycystic  
11  
12 ovary syndrome (PCOS) reported an association between smoking habitude in lean  
13  
14 PCOS patients, and the increase of soft markers of cardiovascular risk. For young adult  
15  
16 African Americans, the association between cigarette smoking and carotid intima  
17  
18 assuming the genetic variation of smokers was reported and the -930<sup>A/G</sup> polymorphism  
19  
20 modified the association among young healthy adults.<sup>26</sup> The study on association  
21  
22 between second hand smoking among childhood and cardiovascular event in adulthood  
23  
24 was conducted and found that the carotid plaque risk in adulthood is increased in  
25  
26 children whose parents had smoked.<sup>27-28</sup>  
27  
28

29  
30 This LCHS study has several strengths, such as high follow-up rates and a large,  
31  
32 national sample. The large sample size of cohort allowed us to investigate the  
33  
34 association of smoking with various levels of serum cholesterol. However, selection  
35  
36 bias may be a potential issue, since the final sample contains a subset of over 118,531  
37  
38 young male adults (38.6%) out of 307,041 subjects initially selected for our study. We  
39  
40 therefore urge conservative interpretations of our study results with regard to the  
41  
42 general population.  
43  
44

45  
46 In conclusion, smoking is a leading cause of ASCVD among young adults in Korea, a  
47  
48 country with a low total cholesterol level and a high smoking rate. And the association  
49  
50 was not modified by total cholesterol level. Smoking among Korean young adult men  
51  
52 was independently associated with increased risk of IHD, stroke and ASCVD. The  
53  
54



1  
2  
3  
4 concentration of cholesterol in Korean men did not modify the effect of smoking on  
5  
6 ASCVD. Therefore, smoking cessation on young adult smokers is essential to prevent  
7  
8 CVD later in adult life. Moreover, clinical practice guidelines and policies should  
9  
10 emphasize to treat nicotine addiction in young smokers.  
11  
12  
13  
14  
15

16 **Acknowledgments:** We appreciate the assistance of the Korean National Health  
17  
18 Insurance Service, which provided the data for this study.  
19  
20  
21  
22  
23

24 **Contributors:** Data analysis was undertaken by YJ and KJJ. The article was drafted by  
25  
26 YJ. SL, JHB, SHJ, and SC substantially contributed to the conception or design of the  
27  
28 work, revising the work, approved the final version to be published, and agreed to be  
29  
30 accountable for all aspects of the work in ensuring that questions related to the accuracy  
31  
32 or integrity of any part of the work are appropriately investigated and resolved.  
33  
34  
35  
36  
37  
38

39 **Funding Sources:** This study was funded with a grant from the Korean Health  
40  
41 Technology R&D Project, Ministry of Health & Welfare, Republic of Korea  
42  
43 (HI14C2686). The funder had no role in the study design and data collection, in  
44  
45 analyzing and interpreting data, or in the decision to submit this work for publication  
46  
47  
48  
49

50 **Conflict of interests:** We declare that we have non conflicts of interest.  
51  
52  
53  
54

1  
2  
3  
4 **Ethics approval:** The study proposal obtained an approval by the Institutional Review  
5  
6 Board of Human Research, Yonsei University (4-2001-0029).  
7

8  
9 **Provenance and peer review:** Not commissioned; externally peer reviewed.  
10

11  
12  
13 **Data sharing statement:** No additional data are available.  
14  
15

16  
17  
18  
19  
20  
21  
22  
23  
24  
25  
26  
27  
28  
29  
30  
31  
32  
33  
34  
35  
36  
37  
38  
39  
40  
41  
42  
43  
44  
45  
46  
47  
48  
49  
50  
51  
52  
53  
54  
55  
56  
57  
58  
59  
60

For peer review only

**REFERENCES**

1. World Health Organization. Cardiovascular diseases (CVDs). Fact sheet. Updated May 2017. <http://www.who.int/mediacentre/factsheets/fs317/en/>. Visited at 3 March, 2018.
2. Jee SH, Samet JM, Ohrr H, Kim JH, Kim IS. Smoking and cancer risk in Korean men and women. *Cancer Causes Control*. 2004;15(4):341-8.
3. Yuan JM, Ross RK, Wang XL, Gao YT, Henderson BE, Yu MC. Morbidity and mortality in relation to cigarette smoking in Shanghai, China. *JAMA* 1996: 1646–50.
4. Liu B-Q, Peto R, Chen Z-M, et al. Emerging tobacco hazards in China: 1. Retrospective proportional mortality study of one million deaths. *Br Med J* 1998;317: 1411–22.
5. Niu S-R, Yang G-H, Chen Z-M, et al. Emerging tobacco hazards in China: 2. Early mortality results from a prospective study. *Br Med J* 1998;317: 1423–24.
6. Robertson TL, Kato H, Gordon T, Kagan A, Rhoads GG, Land CE, Worth RM, Belsky JL, Dock DS, Miyanishi M, Kawamoto S. Epidemiologic studies of coronary heart disease and stroke in Japanese men living in Japan, Hawaii and California. Coronary heart disease risk factors in Japan and Hawaii. *Am J Cardiol*. 1977;39(2):244-9. PubMed PMID: 835483.
7. Lawlor DA, Song YM, Sung J, Ebrahim S, Smith GD. The association of smoking and cardiovascular disease in a population with low cholesterol levels: a study of 648,346 men from the Korean national health system prospective cohort study. *Stroke*.

2008;39(3):760-7. doi: 10.1161/STROKEAHA.107.494823. Epub 2008 Jan 31.

PubMed PMID: 18239177.

8. Hozawa A, Okamura T, Kadowaki T, Murakami Y, Nakamura K, Hayakawa T, Kita Y, Nakamura Y, Okayama A; Hirotsugu Ueshima for NIPPON DATA80 Research group.

Is weak association between cigarette smoking and cardiovascular disease mortality observed in Japan explained by low total cholesterol? NIPPON DATA80. *Int J Epidemiol.* 2007 Oct;36(5):1060-7. Epub 2007 Sep 10. PubMed PMID: 17846054.

9. Nakamura K, Barzi F, Huxley R, Lam TH, Suh I, Woo J, Kim HC, Feigin VL, Gu D,

Woodward M; Asia Pacific Cohort Studies Collaboration. Does cigarette smoking exacerbate the effect of total cholesterol and high-density lipoprotein cholesterol on the risk of cardiovascular diseases? *Heart.* 2009;95(11):909-16. doi:

10.1136/hrt.2008.147066. Epub 2009 Feb 5. PubMed PMID: 19196734.

10. Jee SH, Suh I, Kim IS, Appel LJ. Smoking and atherosclerotic cardiovascular disease in men with low levels of serum cholesterol: the Korea Medical Insurance Corporation Study. *JAMA.* 1999;282(22):2149-55.

11. Jee SH, Park J, Jo I, Lee J, Yun S, Yun JE, Jang Y. Smoking and atherosclerotic cardiovascular disease in women with lower levels of serum cholesterol. *Atherosclerosis.* 2007;190(2):306-12. Epub 2006 May 4.

12. Chobanian AV, Bakris GL, Black HR, Cushman WC, Green LA, Izzo JL Jr, Jones DW, Materson BJ, Oparil S, Wright JT Jr, Roccella EJ; National Heart, Lung, and Blood Institute Joint National Committee on Prevention, Detection, Evaluation, and Treatment of High Blood Pressure; National High Blood Pressure Education Program

1  
2  
3  
4 Coordinating Committee. The Seventh Report of the Joint National Committee on  
5  
6 Prevention, Detection, Evaluation, and Treatment of High Blood Pressure: the JNC 7  
7  
8 report. *JAMA*. 2003;289(19):2560-72. Epub 2003 May 14. Erratum in: *JAMA*. 2003 Jul  
9  
10 9;290(2):197. PubMed PMID: 12748199.

11  
12  
13 13. The National Cholesterol Education Program. Report of the Expert Panel on Blood  
14  
15 Cholesterol Levels in Children and Adolescents. NIH Publication No. 91-2732.  
16  
17 Bethesda, MD; 1994.

18  
19  
20 14. National Diabetes Data Group. Report of the Expert Committee on the Diagnostic  
21  
22 Classification of Diabetes. *Diabetes Care*. 1997;20(7):1183–97.

23  
24  
25 15. Kimm H, Yun JE, Lee SH, et al. Validity of the diagnosis of acute myocardial  
26  
27 infarction in Korean national medical health insurance claims data: the Korean Heart  
28  
29 Study (1). *Korean Circ J* 2012;42:10–15.

30  
31  
32 16. Kim HY. Validity of the diagnosis of acute myocardial infarction in Korean national  
33  
34 medical health insurance claims data: the Korean Heart Study [Master thesis]. Yonsei  
35  
36 University, Seoul, Korea, June 2013.

37  
38  
39 17. Breslow NE, Day NE. Statistical methods in cancer research. Vol. 1: The analysis of  
40  
41 case-control studies. Lyon, France: IARC Scientific Publication No. 32, pp. 146–50.

42  
43  
44 18. Levin ML. The occurrence of lung cancer in man. *Acta Intern Cancer* 1953;19:531.

45  
46  
47 19. Thut AB, Blizzard L, Schmidt MD, Luc PH, Granger RH, Dwyer T. The association  
48  
49 between smoking and hypertension in a population-based sample of Vietnamese men. *J*  
50  
51 *Hypertens*. 2010; 28: 245 – 50.

- 1  
2  
3  
4 20. Kim BJ, Seo DC, Kim BS, Kang JH. Relationship between cotinine-verified  
5 smoking status and incidence of hypertension in 74,743 Korean adults. *Circ J*. 2018 Feb  
6 28. doi: 10.1253/circj.CJ-17-1188. [Epub ahead of print].  
7  
8  
9  
10  
11 21. Morotti E, Battaglia B, Fabbri R, Paradisi R, Venturoli S, Battaglia C. Cigarette  
12 smoking and cardiovascular risk in young women with polycystic ovary syndrome. *Int*  
13 *J Fertil Steril*. 2014;7(4):301-12. Epub 2013 Dec 22.  
14  
15  
16  
17  
18 22. Kiyohara Y, Ueda K, Fujishima M. Smoking and cardiovascular disease in the  
19 general population in Japan. *J Hypertens* 1990;8(Suppl 5):S9–S15.  
20  
21  
22  
23 23. Fujishima M, Kiyohara Y, Ueda K, Hasuo Y, Kato I, Iwamoto H. Smoking as  
24 cardiovascular risk factor in low cholesterol population: the Hisayama Study. *Clin Exp*  
25 *Hypertens A*. 1992;14(1-2):99-108.  
26  
27  
28  
29  
30  
31 24. Gordon T, Garcia-Palmier MR, Kagan A, Kannel WB, Schiffman J. Differences in  
32 coronary heart disease in Framingham, Honolulu and Puerto Rico. *J Chronic Dis*.  
33 1974;27:329–44.  
34  
35  
36  
37  
38 25. Bernaards CM1, Twisk JW, Snel J, van Mechelen W, Kemper HC. In a prospective  
39 study in young people, associations between changes in smoking behavior and risk  
40 factors for cardiovascular disease were complex. *J Clin Epidemiol*. 2005  
41 Nov;58(11):1165-71.  
42  
43  
44  
45  
46  
47 26. Murtaugh KH, Borde-Perry WC, Campbell KL, Gidding SS, Falkner B. Obesity,  
48 smoking, and multiple cardiovascular risk factors in young adult African Americans.  
49  
50  
51  
52  
53  
54

1  
2  
3  
4 27. West HW, Juonala M, Gall SL, Kähönen M, Laitinen T, Taittonen L, Viikari JS,  
5 aitakari OT, Magnussen CG. Exposure to parental smoking in childhood is associated  
6 with increased risk of carotid atherosclerotic plaque in adulthood: the Cardiovascular  
7 Risk in Young Finns Study. *Circulation*. 2015 Apr 7;131(14):1239-46. doi:  
8 10.1161/CIRCULATIONAHA.114.013485. Epub 2015 Mar 23.  
9

10  
11  
12  
13  
14  
15 28. Roy MP, Steptoe A, Kirschbaum C. Association between smoking status and  
16 cardiovascular and cortisol stress responsivity in healthy young men. *Int J Behav Med*.  
17 1994;1(3):264-83.  
18  
19  
20  
21  
22  
23  
24  
25  
26  
27  
28  
29  
30  
31  
32  
33  
34  
35  
36  
37  
38  
39  
40  
41  
42  
43  
44  
45  
46  
47  
48  
49  
50  
51  
52  
53  
54  
55  
56  
57  
58  
59  
60

## Figure legends

Figure 1. Defining the study population

Figure 2. Survival of atherosclerotic cardiovascular disease event by smoking history in Korean young adult men, 1992-2015

Figure 3. Hazard ratios with 95% confidence intervals for from ischemic heart disease, and stroke by cigarette per day and duration of smoking

Figure 4. Hazard ratios with 95% confidence intervals for ischemic heart disease and stroke by total cholesterol groups of smokers compared with nonsmokers: Each group of total cholesterol levels are as follows: first, 149 mg/dl; second, 150-169 mg/dL; third, 170-194 mg/dL; fourth,  $\geq 195$  mg/dL. The reference group is non-smokers in each quartile of total cholesterol.



Table 1. Baseline Characteristics of the Korean Life Course Health Study, 1992-1994, According to Smoking Status\*

| Characteristic                     | Nonsmokers<br>(n=24,950) | Ex-smokers<br>(n=15,126) | No. of cigarettes per day among current smokers |                     |                   | P for<br>Trend <sup>¶</sup> |
|------------------------------------|--------------------------|--------------------------|-------------------------------------------------|---------------------|-------------------|-----------------------------|
|                                    |                          |                          | 1-9<br>(n=22,642)                               | 10-19<br>(n=35,690) | ≥20<br>(n=20,123) |                             |
| Age, year                          | 26.6 (2.1)               | 26.9 (1.9)               | 26.6 (2.0)                                      | 26.8 (1.9)          | 26.8 (1.9)        | 0.1622                      |
| Systolic Blood Pressure, mmHg      | 120.4 (11.6)             | 120.0 (11.8)             | 119.8 (11.6)                                    | 120.1 (11.6)        | 120.3 (11.6)      | 0.2558                      |
| Diastolic Blood Pressure mmHg      | 78.0 (9.0)               | 77.7 (9.1)               | 77.5 (9.0)                                      | 77.8 (9.0)          | 78.0 (9.0)        | 0.1122                      |
| Total cholesterol, mg/dL           | 173.4 (32.9)             | 173.4 (32.6)             | 172.9 (33.1)                                    | 174.5 (33.4)        | 177.2 (34.4)      | 0.9543                      |
| Body mass index, kg/m <sup>2</sup> | 22.3 (2.4)               | 22.4 (2.4)               | 22.3 (2.4)                                      | 22.5 (2.5)          | 22.9 (2.6)        | 0.0056                      |
| Fasting serum glucose, mg/dL       | 86.7 (13.3)              | 86.6 (13.5)              | 86.2 (14.1)                                     | 86.4 (14.1)         | 86.6 (15.3)       | 0.4821                      |
| Alcohol consumption, g per day     | 7.3 (17.7)               | 9.7 (19.7)               | 12.2 (22.6)                                     | 14.5 (25.1)         | 20.4 (36.1)       | <.0001                      |
| Conditions, %                      |                          |                          |                                                 |                     |                   |                             |
| Hypertension <sup>†</sup>          | 22.7                     | 21.8                     | 20.7                                            | 22.1                | 23.0              | 0.7987                      |
| Hypercholesterolemia <sup>‡</sup>  | 3.4                      | 3.3                      | 3.3                                             | 3.9                 | 4.7               | 0.0743                      |
| Diabetes <sup>§</sup>              | 0.7                      | 0.8                      | 0.9                                             | 0.9                 | 1.0               | 0.0060                      |
| Alcohol use <sup>  </sup>          | 61.2                     | 81.3                     | 88.2                                            | 88.3                | 86.9              | 0.1035                      |
| Physical activity                  |                          |                          |                                                 |                     |                   |                             |

\*Data are expressed as means (SD) unless otherwise indicated; †Systolic blood pressure of at least 140 mmHg and/or diastolic blood pressure of at least

1  
2  
3  
4  
5 90 mmHg; ‡Total cholesterol level of at least 6.21 mmol/L (240 mg/dL); § Fasting serum glucose value of at least 6.99 mmol/L (126 mg/L); || Consumption  
6 of Soju which is a colorless distilled beverage of Korean origin; ¶Testing for trend across nonsmokers and current smokers; ex-smokers were excluded.  
7  
8  
9  
10  
11  
12  
13  
14  
15  
16  
17  
18  
19  
20  
21  
22  
23  
24  
25  
26  
27  
28  
29  
30  
31  
32  
33  
34  
35  
36  
37  
38  
39  
40  
41  
42  
43  
44  
45  
46  
47

For peer review only

Table 2. Risk of Morbidity from Ischemic Heart Disease, Cerebrovascular Disease, and Atherosclerotic Cardiovascular Disease in Korean Men in the Korean Life Course Health Study, 1992-2015\*

| Variables and Categories    | Ischemic Heart Disease |        | Cerebrovascular Disease |        | Atherosclerotic Cardiovascular Disease |        |
|-----------------------------|------------------------|--------|-------------------------|--------|----------------------------------------|--------|
|                             | HR (95% CI)            | P      | HR (95% CI)             | P      | HR (95% CI)                            | P      |
| Age (5-year age group)      | 1.4 (1.2 – 1.6)        | <.0001 | 1.4 (1.3 – 1.6)         | <.0001 | 1.3 (1.2 – 1.4)                        | <.0001 |
| Cigarette smoking           |                        |        |                         |        |                                        |        |
| Ex-smoker                   | 1.0 (0.9 – 1.2)        | 0.8567 | 1.1 (0.9 – 1.3)         | 0.5008 | 1.1 (1.0 – 1.2)                        | 0.1406 |
| Current smoker              | 1.5 (1.3 – 1.6)        | <.0001 | 1.4 (1.2 – 1.6)         | <.0001 | 1.4 (1.3 – 1.5)                        | <.0001 |
| Blood Pressure†             |                        |        |                         |        |                                        |        |
| High normal                 | 1.2 (1.1 – 1.4)        | <.0001 | 1.2 (1.0 – 1.3)         | 0.0152 | 1.2 (1.1 – 1.3)                        | <.0001 |
| Stage 1 hypertension        | 1.6 (1.4 – 1.8)        | <.0001 | 1.7 (1.5 – 2.0)         | <.0001 | 1.7 (1.5 – 1.8)                        | <.0001 |
| Stage 2 hypertension        | 2.0 (1.6 – 2.5)        | <.0001 | 3.2 (2.5 – 4.0)         | <.0001 | 2.9 (2.5 – 3.3)                        | <.0001 |
| Total cholesterol‡          |                        |        |                         |        |                                        |        |
| Borderline-high cholesterol | 1.4 (1.3 – 1.6)        | <.0001 | 1.4 (1.3 – 1.6)         | <.0001 | 1.4 (1.3 – 1.5)                        | <.0001 |
| High cholesterol            | 2.5 (2.1 – 2.8)        | <.0001 | 1.7 (1.4 – 2.1)         | <.0001 | 2.1 (1.8 – 2.3)                        | <.0001 |
| Fasting blood sugar§        |                        |        |                         |        |                                        |        |
| Diabetes                    | 1.3 (0.9 – 1.9)        | 0.1375 | 1.6 (1.1 – 2.3)         | 0.0222 | 1.5 (1.2 – 1.9)                        | 0.0008 |
| Physical activity           |                        |        |                         |        |                                        |        |
| No exercise                 | 1.1 (1.0 – 1.3)        | 0.0122 | 1.1 (1.0 – 1.3)         | 0.2156 | 1.1 (1.0 – 1.3)                        | 0.0075 |

\*Hazard ratio (HRs) and 95% confidence intervals (CIs) from multivariable Cox proportional hazards models. †The reference category is normal (systolic

1  
2  
3  
4  
5 blood pressure<140 mmHg and diastolic blood pressure<90mm Hg). ‡ The reference category is desirable (serum cholesterol level, < 5.17 mmol/L [200  
6 mg/dL]). §The reference category is a fasting serum glucose level of less than 6.99 mmol/L (126 mg/dL).  
7  
8  
9  
10  
11  
12  
13  
14  
15  
16  
17  
18  
19  
20  
21  
22  
23  
24  
25  
26  
27  
28  
29  
30  
31  
32  
33  
34  
35  
36  
37  
38  
39  
40  
41  
42  
43  
44  
45  
46  
47

For peer review only

1  
2  
3  
4  
5  
6  
7  
8  
9  
10  
11  
12  
13  
14  
15  
16  
17  
18  
19  
20  
21  
22  
23  
24  
25  
26  
27  
28  
29  
30  
31  
32  
33  
34  
35  
36  
37  
38  
39  
40  
41  
42  
43  
44  
45  
46  
47

Table 3. Population Attributable Risks (PARs) and 95% Confidence Intervals (CIs) From Smoking and Other Risk Factors of Ischemic Heart Disease, Cerebrovascular Disease, and Atherosclerotic Cardiovascular Disease in Korean Men: The Korean Life Course Health Study

| Variables and Categories    | Prevalence<br>% | Ischemic Heart Disease<br>PAR (95% CI) | Cerebrovascular Disease<br>PAR (95% CI) | Atherosclerotic Cardiovascular Disease<br>PAR (95% CI) |
|-----------------------------|-----------------|----------------------------------------|-----------------------------------------|--------------------------------------------------------|
| <b>Smoking</b>              |                 |                                        |                                         |                                                        |
| Current smoker              | 66.2            | 24.9 (16.6 – 28.4)                     | 20.9 (11.7 – 28.4)                      | 20.9 (16.5 – 24.9)                                     |
| <b>Blood Pressure*</b>      |                 |                                        |                                         |                                                        |
| Hypertension                | 22.0            | 8.1 (6.2 – 9.9)                        | 13.3 (9.9 – 14.9)                       | 9.9 (9.9 – 11.7)                                       |
| <b>Total cholesterol†</b>   |                 |                                        |                                         |                                                        |
| Borderline                  | 16.6            | 6.2 (4.7 – 9.1)                        | 6.2 (4.7 – 7.7)                         | 6.2 (4.7 – 7.6)                                        |
| High                        | 3.8             | 5.4 (4.0 – 6.4)                        | 4.0 (2.9 – 4.7)                         | 4.0 (2.9 – 4.7)                                        |
| <b>Fasting blood sugar‡</b> |                 |                                        |                                         |                                                        |
| Diabetes                    | 0.9             | 0.3 (-0.9 – 0.8)                       | 0.5 (0.08 – 1.1)                        | 0.4 (0.2 – 0.8)                                        |
| <b>Physical activity</b>    |                 |                                        |                                         |                                                        |
| No exercise                 | ??              |                                        |                                         |                                                        |

\*The reference category is normal (systolic blood pressure < 140 mmHg and diastolic blood pressure < 90mm Hg). †The reference category is desirable (serum cholesterol level < 5.17 mmol/L [200 mg/dL]). ‡ The reference category is a fasting serum glucose level of less than 6.99 mmol/L (126 mg/dL).

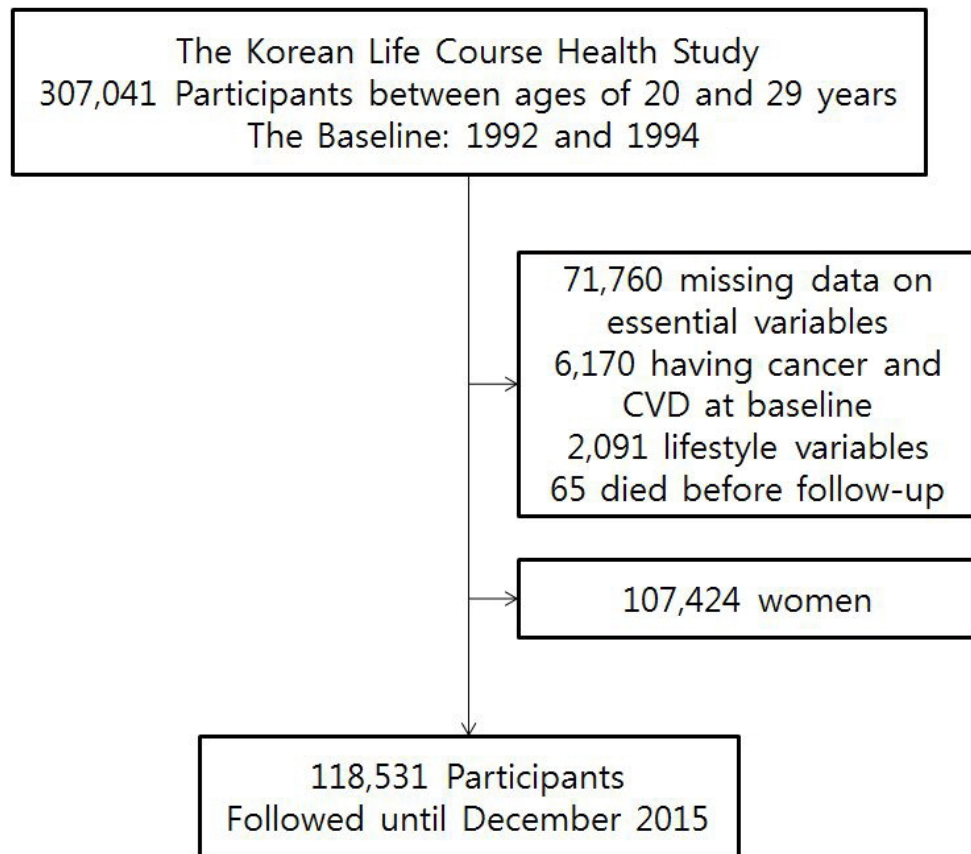

Figure 1

64x56mm (300 x 300 DPI)

1  
2  
3  
4  
5  
6  
7  
8  
9  
10  
11  
12  
13  
14  
15  
16  
17  
18  
19  
20  
21  
22  
23  
24  
25  
26  
27  
28  
29  
30  
31  
32  
33  
34  
35  
36  
37  
38  
39  
40  
41  
42  
43  
44  
45  
46  
47  
48  
49  
50  
51  
52  
53  
54  
55  
56  
57  
58  
59  
60

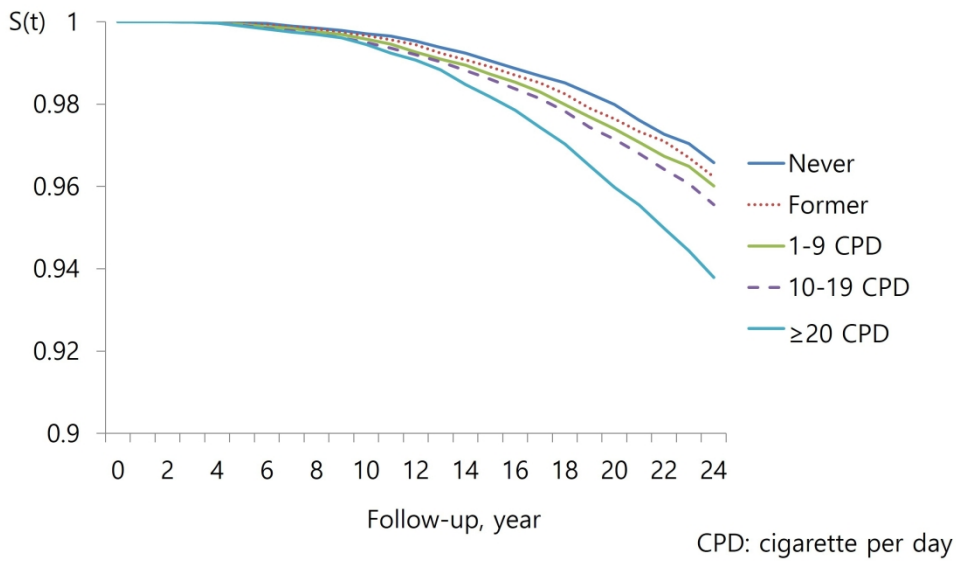

Figure 2

254x190mm (300 x 300 DPI)

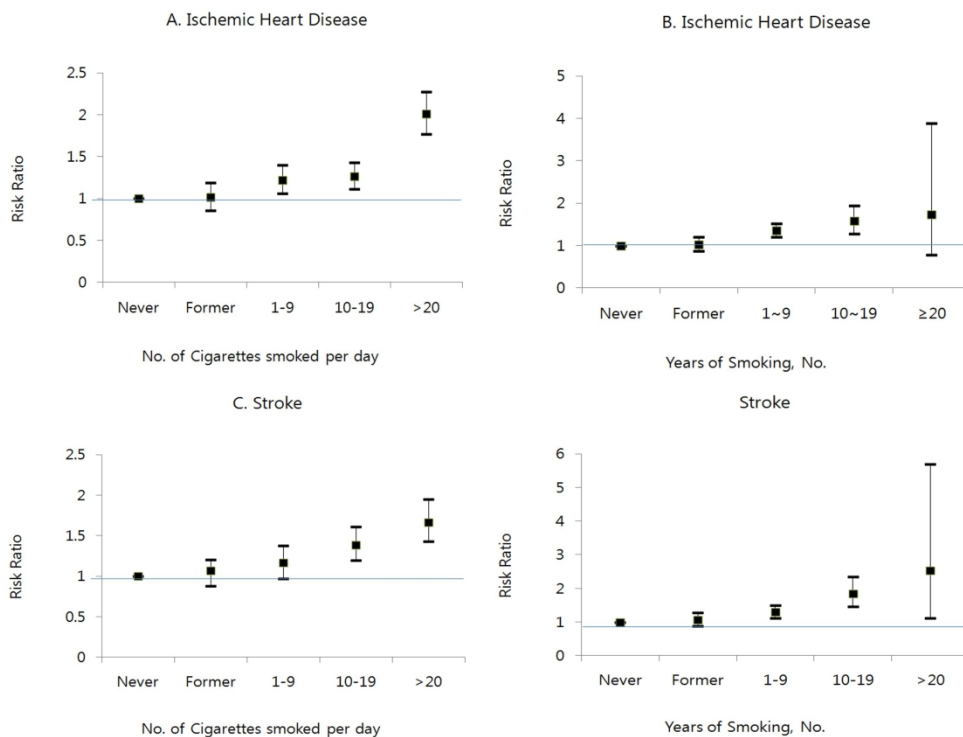

Figure 3

254x190mm (300 x 300 DPI)



1  
2  
3  
4  
5  
6  
7  
8  
9  
10  
11  
12  
13  
14  
15  
16  
17  
18  
19  
20  
21  
22  
23  
24  
25  
26  
27  
28  
29  
30  
31  
32  
33  
34  
35  
36  
37  
38  
39  
40  
41  
42  
43  
44  
45  
46  
47  
48  
49  
50  
51  
52  
53  
54  
55  
56  
57  
58  
59  
60

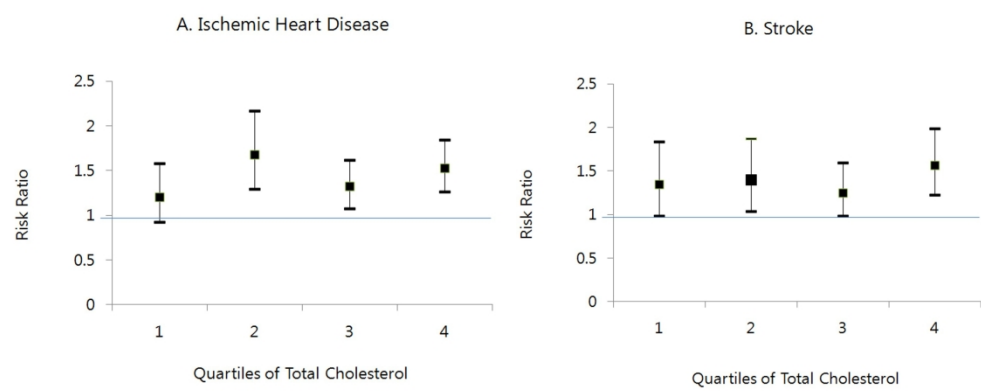

Figure 4

254x190mm (300 x 300 DPI)

Title: smoking is the first leading cause of cardiovascular disease in Young Men.

STROBE Statement—Checklist of items that should be included in reports of cohort studies

|                           | Item No | Recommendation                                                                                                                                                                                                                                                                                                                                                                                                                                 |
|---------------------------|---------|------------------------------------------------------------------------------------------------------------------------------------------------------------------------------------------------------------------------------------------------------------------------------------------------------------------------------------------------------------------------------------------------------------------------------------------------|
| <b>Title and abstract</b> | ①       | (a) Indicate the study's design with a commonly used term in the title or the abstract <i>Page 3</i><br>(b) Provide in the abstract an informative and balanced summary of what was done and what was found <i>page 3</i>                                                                                                                                                                                                                      |
| <b>Introduction</b>       |         |                                                                                                                                                                                                                                                                                                                                                                                                                                                |
| Background/rationale      | ②       | Explain the scientific background and rationale for the investigation being reported <i>page 5</i>                                                                                                                                                                                                                                                                                                                                             |
| Objectives                | ③       | State specific objectives, including any prespecified hypotheses <i>page 6, para 1.</i>                                                                                                                                                                                                                                                                                                                                                        |
| <b>Methods</b>            |         |                                                                                                                                                                                                                                                                                                                                                                                                                                                |
| Study design              | ④       | Present key elements of study design early in the paper <i>Page 6, para 2</i>                                                                                                                                                                                                                                                                                                                                                                  |
| Setting                   | ⑤       | Describe the setting, locations, and relevant dates, including periods of recruitment, exposure, follow-up, and data collection <i>page 6-7.</i>                                                                                                                                                                                                                                                                                               |
| Participants              | ⑥       | (a) Give the eligibility criteria, and the sources and methods of selection of participants. Describe methods of follow-up <i>page 6, page 8</i><br>(b) For matched studies, give matching criteria and number of exposed and unexposed                                                                                                                                                                                                        |
| Variables                 | ⑦       | Clearly define all outcomes, exposures, predictors, potential confounders, and effect modifiers. Give diagnostic criteria, if applicable <i>page 7, para 3, page 8</i>                                                                                                                                                                                                                                                                         |
| Data sources/ measurement | ⑧*      | For each variable of interest, give sources of data and details of methods of assessment (measurement). Describe comparability of assessment methods if there is more than one group <i>page 6, page 7</i>                                                                                                                                                                                                                                     |
| Bias                      | ⑨       | Describe any efforts to address potential sources of bias <i>page 14.</i>                                                                                                                                                                                                                                                                                                                                                                      |
| Study size                | ⑩       | Explain how the study size was arrived at <i>page 7</i>                                                                                                                                                                                                                                                                                                                                                                                        |
| Quantitative variables    | ⑪       | Explain how quantitative variables were handled in the analyses. If applicable, describe which groupings were chosen and why <i>page 8</i>                                                                                                                                                                                                                                                                                                     |
| Statistical methods       | ⑫       | (a) Describe all statistical methods, including those used to control for confounding <i>page 9</i><br>(b) Describe any methods used to examine subgroups and interactions<br>(c) Explain how missing data were addressed<br>(d) If applicable, explain how loss to follow-up was addressed <i>page 8</i><br>(e) Describe any sensitivity analyses <i>page 9-10</i>                                                                            |
| <b>Results</b>            |         |                                                                                                                                                                                                                                                                                                                                                                                                                                                |
| Participants              | ⑬*      | (a) Report numbers of individuals at each stage of study—eg numbers potentially eligible, examined for eligibility, confirmed eligible, included in the study, completing follow-up, and analysed <i>page 10</i><br>(b) Give reasons for non-participation at each stage<br>(c) Consider use of a flow diagram <i>page 7. (Figure 1)</i>                                                                                                       |
| Descriptive data          | ⑭*      | (a) Give characteristics of study participants (eg demographic, clinical, social) and information on exposures and potential confounders <i>page 10</i><br>(b) Indicate number of participants with missing data for each variable of interest<br>(c) Summarise follow-up time (eg, average and total amount) <i>page 10 (23 years of follow-up)</i>                                                                                           |
| Outcome data              | ⑮*      | Report numbers of outcome events or summary measures over time <i>page 10.</i>                                                                                                                                                                                                                                                                                                                                                                 |
| Main results              | ⑯       | (a) Give unadjusted estimates and, if applicable, confounder-adjusted estimates and their precision (eg, 95% confidence interval). Make clear which confounders were adjusted for and why they were included <i>page 10, para 1 (Table 2)</i><br>(b) Report category boundaries when continuous variables were categorized<br>(c) If relevant, consider translating estimates of relative risk into absolute risk for a meaningful time period |

|   |                          |    |                                                                                                                                                                            |                    |
|---|--------------------------|----|----------------------------------------------------------------------------------------------------------------------------------------------------------------------------|--------------------|
| 1 | Other analyses           | 17 | Report other analyses done—eg analyses of subgroups and interactions, and sensitivity analyses                                                                             | page 11 (Figure 4) |
| 2 | <b>Discussion</b>        |    |                                                                                                                                                                            |                    |
| 3 | Key results              | 18 | Summarise key results with reference to study objectives                                                                                                                   | page 12 para 2     |
| 4 | Limitations              | 19 | Discuss limitations of the study, taking into account sources of potential bias or imprecision. Discuss both direction and magnitude of any potential bias                 | page 14, para 2.   |
| 5 | Interpretation           | 20 | Give a cautious overall interpretation of results considering objectives, limitations, multiplicity of analyses, results from similar studies, and other relevant evidence | page 14            |
| 6 | Generalisability         | 21 | Discuss the generalisability (external validity) of the study results                                                                                                      | page 14            |
| 7 | <b>Other information</b> |    |                                                                                                                                                                            |                    |
| 8 | Funding                  | 22 | Give the source of funding and the role of the funders for the present study and, if applicable, for the original study on which the present article is based              | page 15            |

\*Give information separately for exposed and unexposed groups.

**Note:** An Explanation and Elaboration article discusses each checklist item and gives methodological background and published examples of transparent reporting. The STROBE checklist is best used in conjunction with this article (freely available on the Web sites of PLoS Medicine at <http://www.plosmedicine.org/>, Annals of Internal Medicine at <http://www.annals.org/>, and Epidemiology at <http://www.epidem.com/>). Information on the STROBE Initiative is available at <http://www.strobe-statement.org>.

# BMJ Open

## Smoking and Atherosclerotic Cardiovascular Disease Risk in Young Men: The Korean Life Course Health Study

|                                 |                                                                                                                                                                                                                                                                                                                                                                                                                                                                                                        |
|---------------------------------|--------------------------------------------------------------------------------------------------------------------------------------------------------------------------------------------------------------------------------------------------------------------------------------------------------------------------------------------------------------------------------------------------------------------------------------------------------------------------------------------------------|
| Journal:                        | <i>BMJ Open</i>                                                                                                                                                                                                                                                                                                                                                                                                                                                                                        |
| Manuscript ID                   | bmjopen-2018-024453.R1                                                                                                                                                                                                                                                                                                                                                                                                                                                                                 |
| Article Type:                   | Research                                                                                                                                                                                                                                                                                                                                                                                                                                                                                               |
| Date Submitted by the Author:   | 02-Oct-2018                                                                                                                                                                                                                                                                                                                                                                                                                                                                                            |
| Complete List of Authors:       | Jee, Yongho; Seoul National University, Department of Public Health<br>Jung, Keum Ji; Yonsei University Graduate School Institute for Health Promotion, Dept. of Public Health<br>Lee, Sunmi; National Health Insurance Service, Health Insurance Policy Research Institute<br>Back, Joung Hwan; Health Insurance Policy Research Institute<br>Jee, Sun Ha; Graduate School of Public Health, Yonsei University, Epidemiology<br>Cho, Sung-il ; Seoul National University, Department of Public Health |
| <b>Primary Subject Heading</b>: | Epidemiology                                                                                                                                                                                                                                                                                                                                                                                                                                                                                           |
| Secondary Subject Heading:      | Smoking and tobacco, Public health, Cardiovascular medicine                                                                                                                                                                                                                                                                                                                                                                                                                                            |
| Keywords:                       | Smoking, Cardiovascular Disease, Young adults                                                                                                                                                                                                                                                                                                                                                                                                                                                          |
|                                 |                                                                                                                                                                                                                                                                                                                                                                                                                                                                                                        |

SCHOLARONE™  
Manuscripts

Smoking and Atherosclerotic Cardiovascular Disease Risk in Young Men: The Korean  
Life Course Health Study

Yongho Jee, MPH<sup>1,2</sup>, Keum Ji Jung, PhD<sup>2,4</sup>, Sunmi Lee, PhD<sup>3</sup>, Joung Hwan Back, PhD<sup>3</sup>,  
Sun Ha Jee, PhD<sup>2,4\*</sup>, Sung-il Cho, MD, PhD<sup>1\*</sup>

<sup>1</sup> Department of Public Health, Seoul National University, Seoul, Republic of Korea

<sup>2</sup> Institute for Health Promotion, Graduate School of Public Health, Yonsei University,  
Seoul, Republic of Korea

<sup>3</sup> Health Insurance Policy Research Institute, Wonju, Republic of Korea

<sup>4</sup> Department of Epidemiology and Health Promotion, Graduate School of Public Health,  
Yonsei University, Seoul, Republic of Korea

Running title: Smoking is the first leading cause of Cardiovascular Disease

\*These last authors contributed equally to this work

\*Corresponding authors. Department of Epidemiology and Health Promotion, Graduate  
School of Public Health, Yonsei University, Seoul, Republic of Korea.

E-mail address: [jsunha@yuhs.ac](mailto:jsunha@yuhs.ac) (S.H. Jee).

Department of Public Health, Seoul National University, Seoul, Republic of Korea

E-mail address: [scho@snu.ac.kr](mailto:scho@snu.ac.kr) (S.I. Cho).

1  
2  
3  
4 These two authors equally contributed as corresponding author.  
5  
6  
7

8 Word count: 3828  
9

10 Table 3, Figure 4  
11  
12  
13  
14  
15  
16  
17  
18  
19  
20  
21  
22  
23  
24  
25  
26  
27  
28  
29  
30  
31  
32  
33  
34  
35  
36  
37  
38  
39  
40  
41  
42  
43  
44  
45  
46  
47  
48  
49  
50  
51  
52  
53  
54

For peer review only

**Abstract**

**Objective:** To examine the effect of smoking on risk of atherosclerotic cardiovascular disease (ASCVD) in Korean young men and to examine whether serum total cholesterol levels could modify the effect of smoking on ASCVD.

**Design:** A prospective cohort study within a national insurance system.

**Setting:** Health screenings provided by national insurance in 1992 and 1994.

**Participants:** 118,531 young men between 20 and 29 years of age and were followed up for 23 years.

**Outcome measure:** To assess the independent effects of smoking on the risk of Ischemic Heart Disease (IHD), stroke, and ASCVD, Cox proportional hazards regression models were used, controlling for age, hypertension, diabetes, hypercholesterolemia, and alcohol drinking.

**Results:** The total number of current smokers was 78,455 (66.2%), and 94,113 (79.7%) of the sample recorded a total cholesterol level < 200 mg/dl measured at baseline. Between 1993 and 2015, 2,786 cases of IHD (53/100,000 person year), 2,368 cases of stroke (45.4/100,000 person year), and 6,368 ASCVD (122.7/100,000 person year) occurred. The risk of IHD, stroke, and total ASCVD events was found to increase for current smokers, with a hazard ratios (HR) with 95% Confidence Interval (CI) of 1.5 (95% CI: 1.3,1.6), 1.4 (95% CI: 1.2,1.6), and 1.4 (95% CI: 1.3,1.5), respectively. Further, the risks above were also found throughout the range of serum levels of cholesterol.

1  
2  
3  
4 **Conclusions:** Smoking among Korean young adult men was independently associated  
5  
6 with increased risk of IHD, stroke and ASCVD. The concentration of cholesterol in  
7  
8 Korean men did not modify the effect of smoking on ASCVD.  
9

10  
11 **Keywords:** Smoking, Cardiovascular Disease, Young adults  
12  
13  
14  
15  
16  
17  
18  
19  
20  
21

### 22 **Strengths and limitations of this study**

23

- 24  
25 • Novel result from Korean young adults is that smoking is the first leading cause of  
26  
27 Cardiovascular Disease (CVD) while smoking is the second leading cause of CVD in  
28  
29 middle aged adults.  
30
- 31  
32 • The large sample size of cohort with 118,531 young men between 20 and 29 years of  
33  
34 age and were followed up for 23 years.  
35
- 36  
37 • The limitations of this study include possible measurement errors and the non-random  
38  
39 sample used.  
40  
41  
42  
43  
44  
45  
46  
47  
48  
49  
50  
51  
52  
53  
54



## INTRODUCTION

Atherosclerotic cardiovascular diseases (ASCVD) are the leading cause of death globally, with more people dying from ASCVD than any other causes of death annually. A total of 17.7 million people died as a result of ASCVDs in 2015 globally, comprising 31% of all deaths. Of these deaths, 7.4 million are estimated to have been the result of coronary heart disease, whilst 6.7 million were due to stroke<sup>1</sup>. According to previous studies published in the western countries, tobacco use has been reported to be a major risk factor for ASCVD following hypertension.<sup>1</sup>

A growing concern is that for young adults, cigarette smoking may be the first leading cause of ASCVD, owing to the high prevalence of cigarette smoking in comparison to lower levels of alternate risk factors, including hypertension, diabetes, and high cholesterol levels. However, despite these observations, there remain only a small number of studies considering the relationship between smoking and ASCVD in Korea and other countries in East Asia.<sup>2-5</sup>

Further, comparisons with Western populations may be less informative owing to the relatively lower levels of cholesterol commonly present in Asian countries. Biological studies have explored the interaction between smoking and serum cholesterol levels.<sup>6-9</sup> Nevertheless, very few studies have analyzed the interaction effects of smoking and serum cholesterol on ASCVD in young adults

‘World No Tobacco Day 2018’ is a campaign, with the primary objective of raising awareness of the link between tobacco use and negative health outcomes, predominantly heart and other cardiovascular diseases (CVD) including stroke. It will

1  
2  
3  
4 also seek to expand the range of potential strategies key public actors such as  
5  
6 governmental and public bodies can take to reduce the health risks of tobacco use. If  
7  
8 there is an established link between tobacco smoking in young adults and CVD, the  
9  
10 campaign will further increase awareness on smoking in young adults. The government  
11  
12 and the public can then subsequently take actions to reduce risks of smoking at earlier  
13  
14 stage. Unfortunately, however, the association between smoking and CVD in young  
15  
16 adults has not received much attention because at least a long term (over 20 years)  
17  
18 follow-up study is needed. This serves as motivation for this study, in which we aimed  
19  
20 to examine the effect of smoking on risk of ASCVD in Korean young adults with  
21  
22 relatively low serum cholesterol levels. We also investigated whether the effect of  
23  
24 smoking can be modified by serum levels of cholesterol.  
25  
26  
27  
28  
29  
30

## 31 **METHOD**

### 32 **Study participants**

33  
34  
35  
36 In Korea, the Korean Medical Insurance Corporation (KMIC) provided health insurance  
37  
38 for private school staff and civil servants prior to the current insurance system, under  
39  
40 which it was integrated as National Health Insurance.<sup>2</sup> A total of 4,862,438 (10.7%) of  
41  
42 the Korean population were covered by KMIC insurance, of which 1,297,833 were  
43  
44 employees, and 3,364,605 were dependents. All insured participants are required to  
45  
46 participate in a biennial health checkup.<sup>2</sup> Approximately 94% of the insured participants  
47  
48 in 1992 and 1994 were examined biennially. We established a prospective cohort for  
49  
50 participants (aged 20-29) who routinely responded to the questionnaire on disease risk  
51  
52  
53  
54

1  
2  
3  
4 factors and chronic diseases, naming this study the Korean Life Course Health Study  
5 (KLCHS). The KLCHS cohort included 307,041 Koreans (142,461 males, 164,580  
6 females) who were screened by KMIC in 1992 and 1994. Of these participants, 205,840  
7 (67.0%) were registered in 1992 and 101,201 (33.0%) were registered in 1994.  
8  
9

10  
11  
12  
13 Of these 307,041 participants, 71,760 (23.4%) who had incomplete data height, blood  
14 pressure, fasting glucose, total cholesterol, or body mass index were excluded. We also  
15 excluded 6,170 people from our analysis who reported a past history of cancer and  
16 ASCVD, as well as 2,091 people who had missing information on smoking, exercise, or  
17 alcohol drinking, and 65 people who died before start of follow-up. Female participants  
18 were excluded, because of the low prevalence of smoking for females in Korea,  
19 resulting in a total of 118,531 eligible participants for the analysis. The study proposal  
20 obtained an approval by the Institutional Review Board of Human Research, Yonsei  
21 University (4-2001-0029). This study was a retrospective cohort using past routine  
22 laboratory data and did not receive consent.  
23  
24  
25  
26  
27  
28  
29  
30  
31  
32  
33  
34  
35  
36  
37

### 38 **Data collection**

39  
40  
41 The biennial KMIC screening was provided at local hospitals by medical practitioners  
42 according to standard protocols. During the two-year interval examination from 1992 to  
43 2008, we examined the variables related to the lifestyle of participants, such as daily  
44 smoking amount, duration of smoking, and variables related to drinking. From data  
45 collected at baseline, participants were defined as 'current smokers' if they were  
46 smoking currently, 'never smokers' if they had no prior history of smoking, and 'ex-  
47  
48  
49  
50  
51  
52  
53  
54

1  
2  
3  
4 smokers' if they had previously smoked but at the time of measurement did not smoke.  
5  
6 Current smokers were further categorized by amount of cigarettes consumed on average  
7  
8 per day (1–9, 10–19, and 20 or greater) as well as duration of smoking (1–9, 10–19, and  
9  
10 20 or more years) following the example of previous studies.<sup>2,10,11</sup>  
11

12  
13 The definition of hypertension was a systolic BP  $\geq$  140 mmHg or diastolic BP  $\geq$  90  
14  
15 mmHg.<sup>12</sup> Body mass index (BMI) was measured as weight (kg) / height (m)<sup>2</sup>. Serum  
16  
17 total cholesterol was grouped as desirable (<200 mg/dl), borderline-high (200-239  
18  
19 mg/dl), and high ( $\geq$ 240 mg/dl).<sup>13</sup> Definition of diabetes was fasting blood glucose  $\geq$   
20  
21 126 mg / dl.<sup>14</sup>  
22  
23  
24  
25  
26  
27  
28

### 29 **Follow-up and outcomes**

30  
31  
32 The main outcome variables used in the analysis were morbidity and mortality  
33  
34 categorized by IHD, stroke, and ASCVD. For IHD, alone (ICD 10 codes, I20–I25),  
35  
36 acute myocardial infarction (AMI) alone (I21), and angina pectoris (AP) alone (ICD 10  
37  
38 codes, I20) are used. For stroke, stroke alone (I60-I69) was used. Finally, with regard to  
39  
40 ASCVD, we used total ASCVD, including disease of hypertensive (I10–I15), ischemic  
41  
42 heart disease (I20–I25), all stroke (I60–I69), other heart disease (I44–I51), sudden death  
43  
44 (R96), and other vascular disease (I70–I74).  
45  
46

47  
48 The study outcomes were identified through diagnosis information recorded in hospital  
49  
50 admission, and from causes of death using death certificates. The study follow-up was  
51  
52 nearly 100% complete, as we were able to search ASCVD event data electronically by  
53  
54

1  
2  
3  
4 KMIC registrants regarding the morbidity information of ASCVD. The period of  
5  
6 follow-up was 23 years from January 1st, 1993 to December 31st, 2015. Data on causes  
7  
8 of death were available during years 1993–2015, and incidence could be tracked during  
9  
10 years 1995–2015. The time frames over which these outcomes could be assessed varied  
11  
12 with data availability (Figure 1).  
13

14  
15 A validation study was conducted by 20 internists from the Korean Society of  
16  
17 Cardiology in 2009.<sup>15</sup> For the participants who provided written permission for the use  
18  
19 of their personal information, 673 CHD events between 1994 and 2007 were confirmed  
20  
21 with individual hospital medical records, showing that 73% of designated myocardial  
22  
23 infarctions were valid. The validation study was updated in 2013 with a value of 93%.<sup>16</sup>  
24  
25  
26 The validation study on mortality data has not been conducted.  
27  
28  
29  
30  
31

### 32 **Statistical analysis**

33  
34  
35 First, we examined relationships between smoking status and established ASCVD risk  
36  
37 factors at baseline. In considering continuous ASCVD risk factors, we used ordinary  
38  
39 least squares regression and coded smoking quantity as an ordinal variable. In this study,  
40  
41 the Mantel Haenszel method was applied for dichotomous variables.<sup>17</sup>  
42  
43

44  
45 To assess the independent effects of smoking on the risk of IHD, stroke, and ASCVD,  
46  
47 Cox proportional hazards models were used, controlling for age and the confounding  
48  
49 variables such as hypertension, diabetes, high cholesterol, and alcohol drinking. The  
50  
51 proportional assumption was also tested utilizing Schoenfeld residuals, and the survival  
52  
53 curve according to smoking status was plotted using the life-table method. We used  
54

1  
2  
3  
4 Levins formula for calculating population attributable risk (PAR).<sup>18</sup> In additional  
5  
6 analyses, we excluded all events that had occurred in the first 4 years of follow-up.  
7  
8 These analyses ensured sensitivity in our results. In all analyses, a two-sided  
9  
10 significance level of 0.05 was used.  
11  
12  
13  
14  
15

### 16 **Patient and Public Involvement**

17  
18  
19 Patients and or public were not involved.  
20  
21  
22  
23  
24  
25

### 26 **RESULTS**

27  
28 The average age of the study participants was  $26.7 \pm 2.0$  (SD) years. Among the  
29  
30 118,531 men, 78,455 (66.2%) were current smokers, 15,126 (12.8%) were ex-smokers,  
31  
32 and 92,403 (78%) had hypertension. For total cholesterol, 94,413 (79.7%) had a total  
33  
34 serum cholesterol level  $< 200$  mg/dL, 19,764 (16.6%) had a borderline level of 200-240  
35  
36 mg/dL, and 4,444 (3.8%) had a level of 240 mg/dL or higher. In terms of amount of  
37  
38 smoking, 28.9% smoked more than 20 cigarettes per day while 45.5% and 25.6% of  
39  
40 current smokers smoked 1 to 9 and 10 to 19 cigarettes per day, respectively. Among  
41  
42 current smokers, 92.0% smoked for less than 10 years while 7.6% and 0.4% of current  
43  
44 smokers smoked for 10 to 19 years and more than 20 years, respectively.  
45  
46  
47

48  
49 Population characteristics by smoking status are presented in Table 1. After adjusting  
50  
51 for age, current smokers had a significantly higher body mass index (P for trend =  
52  
53 0.0056), higher consumption of alcohol drinking (P for trend  $< .0001$ ), and higher  
54

1  
2  
3  
4 prevalence of diabetes (P for trend = 0.0060) than nonsmokers.  
5

6  
7 During 23 years of follow up (5,191,823 person-years), 2,786 (90 fatal) IHD cases  
8  
9 (53/100,000 person year), stroke cases 2,368 (126 fatal) (45.4/100,000 person year),  
10  
11 and 6,368 ASCVD cases (306 fatal) (122.7/100,000 person year) occurred  
12

13  
14 The independent effects of smoking on IHD, stroke, and ASCVD were analyzed  
15  
16 controlling for confounding factors through Cox proportional hazards models, as shown  
17  
18 in Table 2. The hazard ratios (HR) relating to IHD for current smokers were 1.5 (P  
19  
20 <.0001), and those of ex-smokers were 1.0 (P=0.8567). The HR of stroke was 1.4 (P  
21  
22 <.0001) for current smokers and 1.1 (P = 0.5008) on ex-smokers.  
23

24  
25 Compared to nonsmokers, the HR for any ASCVD event was 1.4 (P < 0.0001) in  
26  
27 current smokers and 1.1 in ex-smokers (P = 0.1406). Figure 2 shows the survival  
28  
29 probability by smoking history (never, former, 1-9, 10-19, ≥20 cigarette per day among  
30  
31 current smokers) and the corresponding unadjusted association with ASCVD. The  
32  
33 overall results demonstrated that smoking among young men increased the risk for  
34  
35 ASCVD relative to nonsmokers. After adjusting for age and traditional ASCVD risk  
36  
37 factors, the HRs for IHD and stroke were estimated for groups classified by amount of  
38  
39 smoking (A and B in Figure 3) and duration of smoking (C and D in Figure 3). For IHD  
40  
41 and stroke, the risk of events increased linearly with higher amount of cigarette per day  
42  
43 (P for trend, <.0001 and <.0001, respectively) and longer duration of smoking (P for  
44  
45 trend, <.0001 and <.0001, respectively) and longer duration of smoking (P for  
46  
47 trend, <.0001 and <.0001, respectively).  
48  
49

50  
51 To examine whether serum total cholesterol levels could modify the effect of smoking  
52  
53 on ASCVD, we divided the cohort participants into quartile of total cholesterol. The  
54

1  
2  
3  
4 risks above were also found throughout the range of serum levels of cholesterol  
5  
6 demonstrating that serum total cholesterol levels did not modify the effect of smoking  
7  
8 on ASCVD (Figure 4).  
9

10  
11 Estimated risk factor prevalence in current studies of smoking and other additional risk  
12  
13 factors were used to estimate the PARs for IHD alone, stroke alone and total ASCVD  
14  
15 (Table 3). For IHD, current smoking accounts for about 24.9% of events, and  
16  
17 hypertension accounts for 8.1% of events. In the case of stroke, smoking was estimated  
18  
19 to account for 20.9%, whilst hypertension was estimated to be responsible for 13.3% of  
20  
21 stroke cases.  
22  
23  
24  
25  
26

## 27 **DISCUSSION**

28  
29 Our study investigated the association between smoking and risk of ASCVD among  
30  
31 Korean young men within a cohort study with a 23 year of follow-up. To our  
32  
33 knowledge, this is the first study focusing on Korean young adults. In our study,  
34  
35 smoking was the most crucial risk factor attributing to 20% of ASCVD mortality in  
36  
37 middle age.  
38  
39  
40

41 Diabetes, hypertension, and hyperlipidemia are well known risk factors for ASCVD<sup>10</sup>.  
42  
43 However, for young adults with relatively low incidence of diabetes, hypertension and  
44  
45 hyperlipidemia, smoking is the most important and an independent risk factor for  
46  
47 predicting ASCVD in the present study. Furthermore, the high smoking rate among  
48  
49 young people is important with respect to the development of middle-aged hypertension  
50  
51 and transition to ASCVD.<sup>19-20</sup> Thus, middle-aged ASCVD morbidity is likely  
52  
53  
54



1  
2  
3  
4 predominantly predicted by smoking in young adulthood.  
5

6  
7 The body of research centered upon the health effects of smoking is steadily increasing,  
8  
9 with findings reported from many countries around the world. However, few studies  
10  
11 have examined the effect of smoking on ASCVD in young adults.<sup>21</sup> Here, we present  
12  
13 evidence that current smoking is an independent risk factor affecting the incidence of  
14  
15 IHD, stroke and ASCVD.  
16

17  
18 These risk associations have been estimated across total serum cholesterol groups. A  
19  
20 cohort study in Hasayama Japan found that smoking showed positive association with  
21  
22 coronary heart disease in people with high levels of serum cholesterol above 180 mg /  
23  
24 dl, but not with people with low level of cholesterol less than 180 mg / dl.<sup>22-23</sup>  
25  
26 Afterward, six epidemiological studies were conducted. Among them, one study from  
27  
28 Puerto Rico Heart Health Program<sup>24</sup> showed similar results, but not all.<sup>7-11</sup> Of course,  
29  
30 all studies were conducted among adult populations. To the best of our knowledge, no  
31  
32 study has been done on young adults with much lower levels of serum cholesterol. In  
33  
34 addition, the high smoking rate among young adults is likely to be, even directly, linked  
35  
36 to high blood pressure among the adult population who developed ASCVD as a major  
37  
38 health problem.  
39  
40  
41

42  
43 In our analysis, there was no observed increase in risk of IHD or stroke among ex-  
44  
45 smokers. That is, the risk of ASCVD in ex-smokers was similar with that of never  
46  
47 smokers. These findings suggest that the risk of IHD lasts for an unknown period, while  
48  
49 the high risk for ASCVD decreases after smoking cessation. In this study, the risk of  
50  
51 ASCVD in ex-smokers was not significant. These findings can be interpreted in two  
52  
53

1  
2  
3  
4 ways. First, it can be an effect on quitting smoking. Second, even if young people aged  
5  
6 20-29 quit smoking, they did not have a long period of life-time cigarette smoking,  
7  
8 which obviously did not have to do with the increased risk of heart disease. It is the part  
9  
10 that needs to be studied further. Previous studies shown that reducing adult smoking  
11  
12 pays more immediate dividends, both in terms of health improvements and cost  
13  
14 savings.<sup>25</sup> In particular, most of the excess risk of vascular mortality due to smoking in  
15  
16 women may be eliminated rapidly upon cessation and within 20 years for lung  
17  
18 diseases.<sup>26</sup> Although it is too late smoking cessation, cancer diagnosis itself may cause  
19  
20 smoking cessation.<sup>27</sup>

21  
22  
23  
24 There are several studies regarding cardiovascular risk among young people. According  
25  
26 to a study conducted by Bernaards et al.,<sup>28</sup> blood pressure and waist circumference were  
27  
28 decreased by lowering weekly tobacco consumption in younger participants. However,  
29  
30 they did not report the risk of developing cardiovascular disease events due to changes  
31  
32 in smoking. This seems to be another significant topic relating to the health of young  
33  
34 adults. Another study conducted by Morotti et al.<sup>21</sup> on young women with polycystic  
35  
36 ovary syndrome (PCOS) reported an association between smoking habitude in lean  
37  
38 PCOS patients, and the increase of soft markers of cardiovascular risk. For young adult  
39  
40 African Americans, the association between cigarette smoking and carotid intima  
41  
42 assuming the genetic variation of smokers was reported and the -930<sup>A/G</sup> polymorphism  
43  
44 modified the association among young healthy adults.<sup>29</sup> The study on association  
45  
46 between second hand smoking among childhood and cardiovascular event in adulthood  
47  
48 was conducted and found that the carotid plaque risk in adulthood is increased in  
49  
50 children whose parents had smoked.<sup>30-31</sup>

1  
2  
3  
4 This LCHS study has several strengths, such as high follow-up rates and a large,  
5  
6 national sample. The large sample size of cohort allowed us to investigate the  
7  
8 association of smoking with various levels of serum cholesterol. The civil servants and  
9  
10 private school teachers who participated in this study accounted for about 11% of the  
11  
12 total population in 1992. We did not compare the characteristics of the 89% population  
13  
14 not included in the study. Therefore, this study will not represent the whole population.  
15  
16 Moreover, selection bias may be a potential issue, since the final sample contains a  
17  
18 subset of over 118,531 young male adults (38.6%) out of 307,041 subjects initially  
19  
20 selected for our study. We therefore urge conservative interpretations of our study  
21  
22 results with regard to the general population.  
23  
24

25  
26 In conclusion, smoking is a leading cause of ASCVD among young adults in Korea, a  
27  
28 country with a low total cholesterol level and a high smoking rate. Moreover, the  
29  
30 association was not modified by total cholesterol level. Smoking among Korean young  
31  
32 adult men was independently associated with increased risk of IHD, stroke and ASCVD.  
33  
34 The concentration of cholesterol in Korean men did not modify the effect of smoking  
35  
36 on ASCVD. Therefore, smoking cessation on young adult smokers is essential to  
37  
38 prevent CVD later in adult life. Moreover, clinical practice guidelines and policies  
39  
40 should emphasize to treat nicotine addiction in young smokers.  
41  
42  
43  
44  
45  
46

47 **Acknowledgments:** We appreciate the assistance of the Korean National Health  
48  
49 Insurance Service, which provided the data for this study.  
50  
51  
52  
53  
54

1  
2  
3  
4 **Contributors:** Data analysis was undertaken by YJ and KJJ. The article was drafted by  
5  
6 YJ. SL, JHB, SHJ, and SC substantially contributed to the conception or design of the  
7  
8 work, revising the work, approved the final version to be published, and agreed to be  
9  
10 accountable for all aspects of the work in ensuring that questions related to the accuracy  
11  
12 or integrity of any part of the work are appropriately investigated and resolved.  
13  
14

15  
16  
17  
18 **Funding Sources:** This study was funded with a grant from the Korean Health  
19  
20 Technology R&D Project, Ministry of Health & Welfare, Republic of Korea  
21  
22 (HI14C2686). The funder had no role in the study design and data collection, in  
23  
24 analyzing and interpreting data, or in the decision to submit this work for publication  
25  
26  
27  
28  
29

30 **Conflict of interests:** None to declare.  
31  
32  
33  
34  
35

36 **Ethics approval:** The study proposal obtained an approval by the Institutional Review  
37  
38 Board of Human Research, Yonsei University (4-2001-0029).  
39  
40

41 **Provenance and peer review:** Not commissioned; externally peer reviewed.  
42  
43  
44

45 **Data sharing statement:** No additional data are available.  
46  
47  
48  
49  
50  
51  
52  
53

**REFERENCES**

1. World Health Organization. Cardiovascular diseases (CVDs). Fact sheet. Updated May 2017. <http://www.who.int/mediacentre/factsheets/fs317/en/>. Visited at 3 March, 2018.
2. Jee SH, Samet JM, Ohrr H, Kim JH, Kim IS. Smoking and cancer risk in Korean men and women. *Cancer Causes Control*. 2004;15(4):341-8.
3. Yuan JM, Ross RK, Wang XL, Gao YT, Henderson BE, Yu MC. Morbidity and mortality in relation to cigarette smoking in Shanghai, China. *JAMA* 1996: 1646–50.
4. Liu B-Q, Peto R, Chen Z-M, et al. Emerging tobacco hazards in China: 1. Retrospective proportional mortality study of one million deaths. *Br Med J* 1998;317: 1411–22.
5. Niu S-R, Yang G-H, Chen Z-M, et al. Emerging tobacco hazards in China: 2. Early mortality results from a prospective study. *Br Med J* 1998;317: 1423–24.
6. Robertson TL, Kato H, Gordon T, Kagan A, Rhoads GG, Land CE, Worth RM, Belsky JL, Dock DS, Miyanishi M, Kawamoto S. Epidemiologic studies of coronary heart disease and stroke in Japanese men living in Japan, Hawaii and California. Coronary heart disease risk factors in Japan and Hawaii. *Am J Cardiol*. 1977;39(2):244-9. PubMed PMID: 835483.
7. Lawlor DA, Song YM, Sung J, Ebrahim S, Smith GD. The association of smoking and cardiovascular disease in a population with low cholesterol levels: a study of 648,346 men from the Korean national health system prospective cohort study. *Stroke*.

1  
2  
3  
4 2008;39(3):760-7. doi: 10.1161/STROKEAHA.107.494823. Epub 2008 Jan 31.  
5  
6 PubMed PMID: 18239177.

7  
8  
9 8. Hozawa A, Okamura T, Kadowaki T, Murakami Y, Nakamura K, Hayakawa T, Kita Y,  
10 Nakamura Y, Okayama A; Hirotsugu Ueshima for NIPPON DATA80 Research group.  
11  
12 Is weak association between cigarette smoking and cardiovascular disease mortality  
13 observed in Japan explained by low total cholesterol? NIPPON DATA80. *Int J*  
14  
15  
16  
17 *Epidemiol.* 2007 Oct;36(5):1060-7. Epub 2007 Sep 10. PubMed PMID: 17846054.  
18

19  
20  
21 9. Nakamura K, Barzi F, Huxley R, Lam TH, Suh I, Woo J, Kim HC, Feigin VL, Gu D,  
22  
23  
24  
25  
26  
27  
28  
29  
30  
31  
32  
33  
34  
35  
36  
37  
38  
39  
40  
41  
42  
43  
44  
45  
46  
47  
48  
49  
50  
51  
52  
53  
54  
55  
56  
57  
58  
59  
60  
Woodward M; Asia Pacific Cohort Studies Collaboration. Does cigarette smoking  
exacerbate the effect of total cholesterol and high-density lipoprotein cholesterol on the  
risk of cardiovascular diseases? *Heart.* 2009;95(11):909-16. doi:  
10.1136/hrt.2008.147066. Epub 2009 Feb 5. PubMed PMID: 19196734.

10. Jee SH, Suh I, Kim IS, Appel LJ. Smoking and atherosclerotic cardiovascular  
disease in men with low levels of serum cholesterol: the Korea Medical Insurance  
Corporation Study. *JAMA.* 1999;282(22):2149-55.

11. Jee SH, Park J, Jo I, Lee J, Yun S, Yun JE, Jang Y. Smoking and atherosclerotic  
cardiovascular disease in women with lower levels of serum cholesterol.  
*Atherosclerosis.* 2007;190(2):306-12. Epub 2006 May 4.

12. Chobanian AV, Bakris GL, Black HR, Cushman WC, Green LA, Izzo JL Jr, Jones  
DW, Materson BJ, Oparil S, Wright JT Jr, Roccella EJ; National Heart, Lung, and  
Blood Institute Joint National Committee on Prevention, Detection, Evaluation, and  
Treatment of High Blood Pressure; National High Blood Pressure Education Program

1  
2  
3  
4 Coordinating Committee. The Seventh Report of the Joint National Committee on  
5  
6 Prevention, Detection, Evaluation, and Treatment of High Blood Pressure: the JNC 7  
7  
8 report. *JAMA*. 2003;289(19):2560-72. Epub 2003 May 14. Erratum in: *JAMA*. 2003 Jul  
9  
10 9;290(2):197. PubMed PMID: 12748199.

11  
12  
13 13. The National Cholesterol Education Program. Report of the Expert Panel on Blood  
14  
15 Cholesterol Levels in Children and Adolescents. NIH Publication No. 91-2732.  
16  
17 Bethesda, MD; 1994.

18  
19  
20 14. National Diabetes Data Group. Report of the Expert Committee on the Diagnostic  
21  
22 Classification of Diabetes. *Diabetes Care*. 1997;20(7):1183–97.

23  
24  
25 15. Kimm H, Yun JE, Lee SH, et al. Validity of the diagnosis of acute myocardial  
26  
27 infarction in Korean national medical health insurance claims data: the Korean Heart  
28  
29 Study (1). *Korean Circ J* 2012;42:10–15.

30  
31  
32 16. Kim HY. Validity of the diagnosis of acute myocardial infarction in Korean national  
33  
34 medical health insurance claims data: the Korean Heart Study [Master thesis]. Yonsei  
35  
36 University, Seoul, Korea, June 2013.

37  
38  
39 17. Breslow NE, Day NE. Statistical methods in cancer research. Vol. 1: The analysis of  
40  
41 case-control studies. Lyon, France: IARC Scientific Publication No. 32, pp. 146–50.

42  
43  
44 18. Levin ML. The occurrence of lung cancer in man. *Acta Intern Cancer* 1953;19:531.

45  
46  
47 19. Thut AB, Blizzard L, Schmidt MD, Luc PH, Granger RH, Dwyer T. The association  
48  
49 between smoking and hypertension in a population-based sample of Vietnamese men. *J*  
50  
51 *Hypertens*. 2010; 28: 245 – 50.

- 1  
2  
3  
4 20. Kim BJ, Seo DC, Kim BS, Kang JH. Relationship between cotinine-verified  
5 smoking status and incidence of hypertension in 74,743 Korean adults. *Circ J*. 2018 Feb  
6 28. doi: 10.1253/circj.CJ-17-1188. [Epub ahead of print].  
7  
8  
9  
10  
11 21. Morotti E, Battaglia B, Fabbri R, Paradisi R, Venturoli S, Battaglia C. Cigarette  
12 smoking and cardiovascular risk in young women with polycystic ovary syndrome. *Int*  
13 *J Fertil Steril*. 2014;7(4):301-12. Epub 2013 Dec 22.  
14  
15  
16  
17  
18 22. Kiyohara Y, Ueda K, Fujishima M. Smoking and cardiovascular disease in the  
19 general population in Japan. *J Hypertens* 1990;8(Suppl 5):S9–S15.  
20  
21  
22  
23 23. Fujishima M, Kiyohara Y, Ueda K, Hasuo Y, Kato I, Iwamoto H. Smoking as  
24 cardiovascular risk factor in low cholesterol population: the Hisayama Study. *Clin Exp*  
25 *Hypertens A*. 1992;14(1-2):99-108.  
26  
27  
28  
29  
30  
31 24. Gordon T, Garcia-Palmier MR, Kagan A, Kannel WB, Schiffman J. Differences in  
32 coronary heart disease in Framingham, Honolulu and Puerto Rico. *J Chronic Dis*.  
33 1974;27:329–44.  
34  
35  
36  
37  
38 25. Lightwood JM, Glantz SA. Short-term economic and health benefits of smoking  
39 cessation: myocardial infarction and stroke. *Circulation*. 1997;96(4):1089-96.  
40  
41  
42  
43 26. Kenfield SA, Stampfer MJ, Rosner BA, Colditz GA. Smoking and smoking  
44 cessation in relation to mortality in women. *JAMA*. 2008;299(17):2037-47.  
45  
46  
47  
48 27. Westmaas JL, Newton CC, Stevens VL, Flanders WD, Gapstur SM, Jacobs EJ.  
49 Does a Recent Cancer Diagnosis Predict Smoking Cessation? An Analysis From a  
50 Large Prospective US Cohort. *J Clin Oncol*. 2015;33(15):1647-52.  
51  
52  
53  
54



1  
2  
3  
4 28. Bornaards CM1, Twisk JW, Snel J, van Mechelen W, Kemper HC. In a prospective  
5 study in young people, associations between changes in smoking behavior and risk  
6 factors for cardiovascular disease were complex. *J Clin Epidemiol*. 2005  
7 Nov;58(11):1165-71.

8  
9  
10  
11  
12  
13 29. Murtaugh KH, Borde-Perry WC, Campbell KL, Gidding SS, Falkner B. Obesity,  
14 smoking, and multiple cardiovascular risk factors in young adult African Americans.  
15 *Ethn Dis*. 2002 Summer;12(3):331-5.

16  
17  
18  
19  
20 30. West HW, Juonala M, Gall SL, Kähönen M, Laitinen T, Taittonen L, Viikari JS,  
21 aitakari OT, Magnussen CG. Exposure to parental smoking in childhood is associated  
22 with increased risk of carotid atherosclerotic plaque in adulthood: the Cardiovascular  
23 Risk in Young Finns Study. *Circulation*. 2015 Apr 7;131(14):1239-46. doi:  
24 10.1161/CIRCULATIONAHA.114.013485. Epub 2015 Mar 23.

25  
26  
27  
28  
29  
30  
31  
32 31. Roy MP, Steptoe A, Kirschbaum C. Association between smoking status and  
33 cardiovascular and cortisol stress responsivity in healthy young men. *Int J Behav Med*.  
34 1994;1(3):264-83.  
35  
36  
37  
38  
39  
40  
41  
42  
43  
44  
45  
46  
47  
48  
49  
50  
51  
52  
53  
54

## Figure legends

Figure 1. Timeline for data collection in the Korean Life Course Health Study

Figure 2. Survival of atherosclerotic cardiovascular disease event by smoking history in Korean young adult men, 1992-2015

Figure 3. Hazard ratios with 95% confidence intervals for from ischemic heart disease, and stroke by cigarette per day and duration of smoking

Figure 4. Hazard ratios with 95% confidence intervals for ischemic heart disease and stroke by total cholesterol groups of smokers compared with nonsmokers: Each group of total cholesterol levels are as follows: first, 149 mg/dl; second, 150-169 mg/dL; third, 170-194 mg/dL; fourth,  $\geq 195$  mg/dL. The reference group is non-smokers in each quartile of total cholesterol.

Table 1. Baseline Characteristics of the Korean Life Course Health Study, 1992-1994, According to Smoking Status\*

| Characteristic                     | Nonsmokers<br>(n=24,950) | Ex-smokers<br>(n=15,126) | No. of cigarettes per day among current smokers |                     |                   | P for<br>Trend <sup>¶</sup> |
|------------------------------------|--------------------------|--------------------------|-------------------------------------------------|---------------------|-------------------|-----------------------------|
|                                    |                          |                          | 1-9<br>(n=22,642)                               | 10-19<br>(n=35,690) | ≥20<br>(n=20,123) |                             |
| Age, year                          | 26.6 (2.1)               | 26.9 (1.9)               | 26.6 (2.0)                                      | 26.8 (1.9)          | 26.8 (1.9)        | 0.1622                      |
| Systolic Blood Pressure, mmHg      | 120.4 (11.6)             | 120.0 (11.8)             | 119.8 (11.6)                                    | 120.1 (11.6)        | 120.3 (11.6)      | 0.2558                      |
| Diastolic Blood Pressure mmHg      | 78.0 (9.0)               | 77.7 (9.1)               | 77.5 (9.0)                                      | 77.8 (9.0)          | 78.0 (9.0)        | 0.1122                      |
| Total cholesterol, mg/dL           | 173.4 (32.9)             | 173.4 (32.6)             | 172.9 (33.1)                                    | 174.5 (33.4)        | 177.2 (34.4)      | 0.9543                      |
| Body mass index, kg/m <sup>2</sup> | 22.3 (2.4)               | 22.4 (2.4)               | 22.3 (2.4)                                      | 22.5 (2.5)          | 22.9 (2.6)        | 0.0056                      |
| Fasting serum glucose, mg/dL       | 86.7 (13.3)              | 86.6 (13.5)              | 86.2 (14.1)                                     | 86.4 (14.1)         | 86.6 (15.3)       | 0.4821                      |
| Alcohol consumption, g per day     | 7.3 (17.7)               | 9.7 (19.7)               | 12.2 (22.6)                                     | 14.5 (25.1)         | 20.4 (36.1)       | <.0001                      |
| Conditions, %                      |                          |                          |                                                 |                     |                   |                             |
| Hypertension <sup>†</sup>          | 15.7                     | 15.1                     | 14.5                                            | 15.6                | 15.7              | 0.7987                      |
| Hypercholesterolemia <sup>‡</sup>  | 3.4                      | 3.3                      | 3.3                                             | 3.9                 | 4.7               | 0.0743                      |
| Diabetes <sup>§</sup>              | 0.7                      | 0.8                      | 0.9                                             | 0.9                 | 1.0               | 0.0060                      |
| Alcohol use <sup>  </sup>          | 61.2                     | 81.3                     | 88.2                                            | 88.3                | 86.9              | 0.1035                      |
| Physical activity                  | 24.9                     | 26.8                     | 22.9                                            | 17.5                | 13.0              | <.0001                      |

\*Data are expressed as means (SD) unless otherwise indicated; †Systolic blood pressure of at least 140 mmHg and/or diastolic blood pressure of at least

1  
2  
3  
4  
5 90 mmHg; ‡Total cholesterol level of at least 6.21 mmol/L (240 mg/dL); § Fasting serum glucose value of at least 6.99 mmol/L (126 mg/L); || Consumption  
6  
7 of Soju which is a colorless distilled beverage of Korean origin; ¶Testing for trend across nonsmokers and current smokers; ex-smokers were excluded.  
8  
9  
10  
11  
12  
13  
14  
15  
16  
17  
18  
19  
20  
21  
22  
23  
24  
25  
26  
27  
28  
29  
30  
31  
32  
33  
34  
35  
36  
37  
38  
39  
40  
41  
42  
43  
44  
45  
46  
47

For peer review only

Table 2. Risk of Morbidity from Ischemic Heart Disease, Cerebrovascular Disease, and Atherosclerotic Cardiovascular Disease in Korean Men in the Korean Life Course Health Study, 1992-2015\*

| Variables and Categories    | Ischemic Heart Disease |        | Cerebrovascular Disease |        | Atherosclerotic Cardiovascular Disease |        |
|-----------------------------|------------------------|--------|-------------------------|--------|----------------------------------------|--------|
|                             | HR (95% CI)            | P      | HR (95% CI)             | P      | HR (95% CI)                            | P      |
| Age (5-year age group)      | 1.4 (1.2 – 1.6)        | <.0001 | 1.4 (1.3 – 1.6)         | <.0001 | 1.3 (1.2 – 1.4)                        | <.0001 |
| Cigarette smoking           |                        |        |                         |        |                                        |        |
| Ex-smoker                   | 1.0 (0.9 – 1.2)        | 0.8567 | 1.1 (0.9 – 1.3)         | 0.5008 | 1.1 (1.0 – 1.2)                        | 0.1406 |
| Current smoker              | 1.5 (1.3 – 1.6)        | <.0001 | 1.4 (1.2 – 1.6)         | <.0001 | 1.4 (1.3 – 1.5)                        | <.0001 |
| Blood Pressure†             |                        |        |                         |        |                                        |        |
| High normal                 | 1.2 (1.1 – 1.4)        | <.0001 | 1.2 (1.0 – 1.3)         | 0.0152 | 1.2 (1.1 – 1.3)                        | <.0001 |
| Stage 1 hypertension        | 1.6 (1.4 – 1.8)        | <.0001 | 1.7 (1.5 – 2.0)         | <.0001 | 1.7 (1.5 – 1.8)                        | <.0001 |
| Stage 2 hypertension        | 2.0 (1.6 – 2.5)        | <.0001 | 3.2 (2.5 – 4.0)         | <.0001 | 2.9 (2.5 – 3.3)                        | <.0001 |
| Total cholesterol‡          |                        |        |                         |        |                                        |        |
| Borderline-high cholesterol | 1.4 (1.3 – 1.6)        | <.0001 | 1.4 (1.3 – 1.6)         | <.0001 | 1.4 (1.3 – 1.5)                        | <.0001 |
| High cholesterol            | 2.5 (2.1 – 2.8)        | <.0001 | 1.7 (1.4 – 2.1)         | <.0001 | 2.1 (1.8 – 2.3)                        | <.0001 |
| Fasting blood sugar§        |                        |        |                         |        |                                        |        |
| Diabetes                    | 1.3 (0.9 – 1.9)        | 0.1375 | 1.6 (1.1 – 2.3)         | 0.0222 | 1.5 (1.2 – 1.9)                        | 0.0008 |
| Physical activity           |                        |        |                         |        |                                        |        |
| No exercise                 | 1.1 (1.0 – 1.3)        | 0.0122 | 1.1 (1.0 – 1.3)         | 0.2156 | 1.1 (1.0 – 1.3)                        | 0.0075 |

\*Hazard ratio (HRs) and 95% confidence intervals (CIs) from multivariable Cox proportional hazards models. †The reference category is normal (systolic

1  
2  
3  
4  
5 blood pressure<140 mmHg and diastolic blood pressure<90mm Hg). ‡ The reference category is desirable (serum cholesterol level, < 5.17 mmol/L [200  
6 mg/dL]). §The reference category is a fasting serum glucose level of less than 6.99 mmol/L (126 mg/dL).  
7  
8  
9  
10  
11  
12  
13  
14  
15  
16  
17  
18  
19  
20  
21  
22  
23  
24  
25  
26  
27  
28  
29  
30  
31  
32  
33  
34  
35  
36  
37  
38  
39  
40  
41  
42  
43  
44  
45  
46  
47

For peer review only

Table 3. Population Attributable Risks (PARs) and 95% Confidence Intervals (CIs) From Smoking and Other Risk Factors of Ischemic Heart Disease, Cerebrovascular Disease, and Atherosclerotic Cardiovascular Disease in Korean Men: The Korean Life Course Health Study

| Variables and Categories    | Prevalence<br>% | Ischemic Heart Disease<br>PAR (95% CI) | Cerebrovascular Disease<br>PAR (95% CI) | Atherosclerotic Cardiovascular Disease<br>PAR (95% CI) |
|-----------------------------|-----------------|----------------------------------------|-----------------------------------------|--------------------------------------------------------|
| <b>Smoking</b>              |                 |                                        |                                         |                                                        |
| Current smoker              | 66.2            | 24.9 (16.6 – 28.4)                     | 20.9 (11.7 – 28.4)                      | 20.9 (16.5 – 24.9)                                     |
| <b>Blood Pressure*</b>      |                 |                                        |                                         |                                                        |
| Hypertension                | 22.0            | 8.1 (6.2 – 9.9)                        | 13.3 (9.9 – 14.9)                       | 9.9 (9.9 – 11.7)                                       |
| <b>Total cholesterol†</b>   |                 |                                        |                                         |                                                        |
| Borderline                  | 16.6            | 6.2 (4.7 – 9.1)                        | 6.2 (4.7 – 7.7)                         | 6.2 (4.7 – 7.6)                                        |
| High                        | 3.8             | 5.4 (4.0 – 6.4)                        | 4.0 (2.9 – 4.7)                         | 4.0 (2.9 – 4.7)                                        |
| <b>Fasting blood sugar‡</b> |                 |                                        |                                         |                                                        |
| Diabetes                    | 0.9             | 0.3 (-0.9 – 0.8)                       | 0.5 (0.08 – 1.1)                        | 0.4 (0.2 – 0.8)                                        |
| <b>Physical activity</b>    |                 |                                        |                                         |                                                        |
| No exercise                 | 0.8             | 7.4 (0 – 19.3)                         | 7.4 (0 – 19.3)                          | 7.4 (0 – 19.3)                                         |

\*The reference category is normal (systolic blood pressure < 140 mmHg and diastolic blood pressure < 90mm Hg). †The reference category is desirable (serum cholesterol level < 5.17 mmol/L [200 mg/dL]). ‡ The reference category is a fasting serum glucose level of less than 6.99 mmol/L (126 mg/dL).

Figure 1

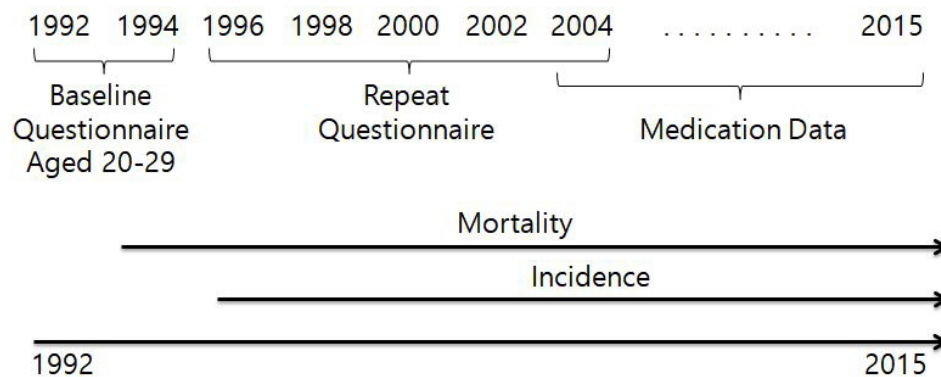

69x33mm (300 x 300 DPI)



1  
2  
3  
4  
5  
6  
7  
8  
9  
10  
11  
12  
13  
14  
15  
16  
17  
18  
19  
20  
21  
22  
23  
24  
25  
26  
27  
28  
29  
30  
31  
32  
33  
34  
35  
36  
37  
38  
39  
40  
41  
42  
43  
44  
45  
46  
47  
48  
49  
50  
51  
52  
53  
54  
55  
56  
57  
58  
59  
60



Figure 2

254x190mm (300 x 300 DPI)

Figure 3.

A. Ischemic Heart Disease

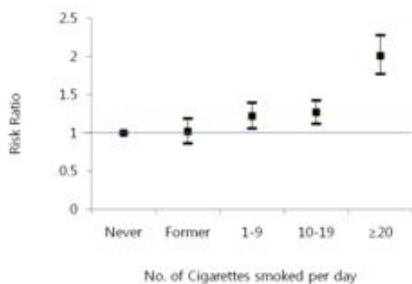

B. Ischemic Heart Disease

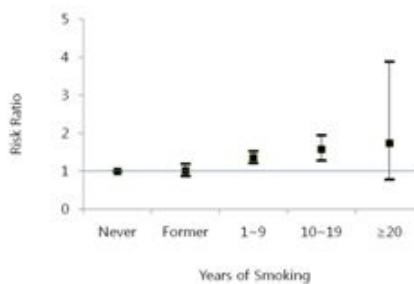

C. Stroke

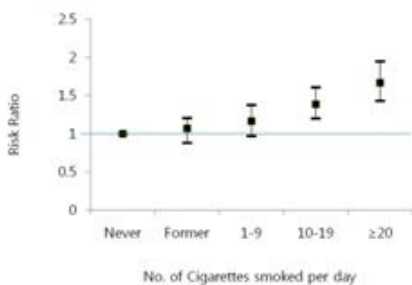

D. Stroke

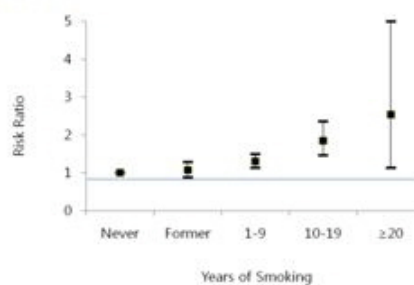

E. ASCVD

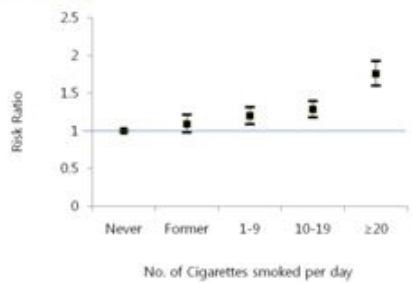

F. ASCVD

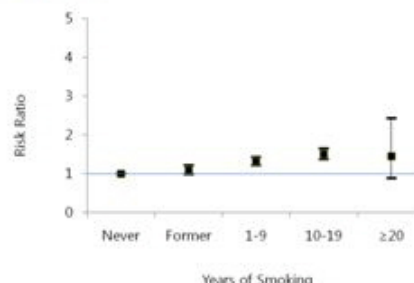

46x53mm (300 x 300 DPI)

1  
2  
3  
4  
5  
6  
7  
8  
9  
10  
11  
12  
13  
14  
15  
16  
17  
18  
19  
20  
21  
22  
23  
24  
25  
26  
27  
28  
29  
30  
31  
32  
33  
34  
35  
36  
37  
38  
39  
40  
41  
42  
43  
44  
45  
46  
47  
48  
49  
50  
51  
52  
53  
54  
55  
56  
57  
58  
59  
60

Figure 4.

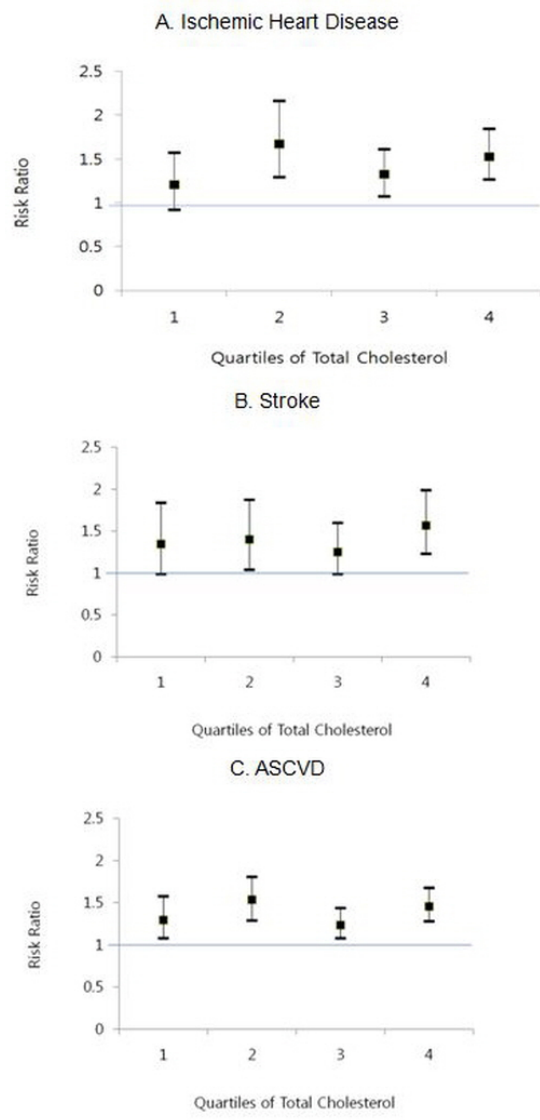

46x94mm (300 x 300 DPI)

Title: *smoking is the first leading cause of cardiovascular disease in Young Men.*

STROBE Statement—Checklist of items that should be included in reports of *cohort studies*

|                           | Item No | Recommendation                                                                                                                                                                                                                                                                                                                                                                                                                                 |
|---------------------------|---------|------------------------------------------------------------------------------------------------------------------------------------------------------------------------------------------------------------------------------------------------------------------------------------------------------------------------------------------------------------------------------------------------------------------------------------------------|
| <b>Title and abstract</b> | ①       | (a) Indicate the study's design with a commonly used term in the title or the abstract <i>Page 3</i><br>(b) Provide in the abstract an informative and balanced summary of what was done and what was found <i>page 3</i>                                                                                                                                                                                                                      |
| <b>Introduction</b>       |         |                                                                                                                                                                                                                                                                                                                                                                                                                                                |
| Background/rationale      | ②       | Explain the scientific background and rationale for the investigation being reported <i>page 5</i>                                                                                                                                                                                                                                                                                                                                             |
| Objectives                | ③       | State specific objectives, including any prespecified hypotheses <i>page 6, para 1.</i>                                                                                                                                                                                                                                                                                                                                                        |
| <b>Methods</b>            |         |                                                                                                                                                                                                                                                                                                                                                                                                                                                |
| Study design              | ④       | Present key elements of study design early in the paper <i>Page 6, para 2</i>                                                                                                                                                                                                                                                                                                                                                                  |
| Setting                   | ⑤       | Describe the setting, locations, and relevant dates, including periods of recruitment, exposure, follow-up, and data collection <i>page 6-7.</i>                                                                                                                                                                                                                                                                                               |
| Participants              | ⑥       | (a) Give the eligibility criteria, and the sources and methods of selection of participants. Describe methods of follow-up <i>page 6, page 8</i><br>(b) For matched studies, give matching criteria and number of exposed and unexposed                                                                                                                                                                                                        |
| Variables                 | ⑦       | Clearly define all outcomes, exposures, predictors, potential confounders, and effect modifiers. Give diagnostic criteria, if applicable <i>page 7, para 3, page 8</i>                                                                                                                                                                                                                                                                         |
| Data sources/ measurement | ⑧*      | For each variable of interest, give sources of data and details of methods of assessment (measurement). Describe comparability of assessment methods if there is more than one group <i>page 6, page 7</i>                                                                                                                                                                                                                                     |
| Bias                      | ⑨       | Describe any efforts to address potential sources of bias <i>page 14.</i>                                                                                                                                                                                                                                                                                                                                                                      |
| Study size                | ⑩       | Explain how the study size was arrived at <i>page 7</i>                                                                                                                                                                                                                                                                                                                                                                                        |
| Quantitative variables    | ⑪       | Explain how quantitative variables were handled in the analyses. If applicable, describe which groupings were chosen and why <i>page 8</i>                                                                                                                                                                                                                                                                                                     |
| Statistical methods       | ⑫       | (a) Describe all statistical methods, including those used to control for confounding <i>page 9</i><br>(b) Describe any methods used to examine subgroups and interactions<br>(c) Explain how missing data were addressed<br>(d) If applicable, explain how loss to follow-up was addressed <i>page 8</i><br>(e) Describe any sensitivity analyses <i>page 9-10</i>                                                                            |
| <b>Results</b>            |         |                                                                                                                                                                                                                                                                                                                                                                                                                                                |
| Participants              | ⑬*      | (a) Report numbers of individuals at each stage of study—eg numbers potentially eligible, examined for eligibility, confirmed eligible, included in the study, completing follow-up, and analysed <i>page 10</i><br>(b) Give reasons for non-participation at each stage<br>(c) Consider use of a flow diagram <i>page 7. (Figure 1)</i>                                                                                                       |
| Descriptive data          | ⑭*      | (a) Give characteristics of study participants (eg demographic, clinical, social) and information on exposures and potential confounders <i>page 10</i><br>(b) Indicate number of participants with missing data for each variable of interest<br>(c) Summarise follow-up time (eg, average and total amount) <i>page 10 (23 years of follow-up)</i>                                                                                           |
| Outcome data              | ⑮*      | Report numbers of outcome events or summary measures over time <i>page 10.</i>                                                                                                                                                                                                                                                                                                                                                                 |
| Main results              | ⑯       | (a) Give unadjusted estimates and, if applicable, confounder-adjusted estimates and their precision (eg, 95% confidence interval). Make clear which confounders were adjusted for and why they were included <i>page 10, para 1 (Table 2)</i><br>(b) Report category boundaries when continuous variables were categorized<br>(c) If relevant, consider translating estimates of relative risk into absolute risk for a meaningful time period |

|   |                          |    |                                                                                                                                                                            |                    |
|---|--------------------------|----|----------------------------------------------------------------------------------------------------------------------------------------------------------------------------|--------------------|
| 1 | Other analyses           | 17 | Report other analyses done—eg analyses of subgroups and interactions, and sensitivity analyses                                                                             | page 11 (Figure 4) |
| 2 | <b>Discussion</b>        |    |                                                                                                                                                                            |                    |
| 3 | Key results              | 18 | Summarise key results with reference to study objectives                                                                                                                   | page 12 para 2     |
| 4 | Limitations              | 19 | Discuss limitations of the study, taking into account sources of potential bias or imprecision. Discuss both direction and magnitude of any potential bias                 | page 14, para 2.   |
| 5 | Interpretation           | 20 | Give a cautious overall interpretation of results considering objectives, limitations, multiplicity of analyses, results from similar studies, and other relevant evidence | page 14            |
| 6 | Generalisability         | 21 | Discuss the generalisability (external validity) of the study results                                                                                                      | page 14            |
| 7 | <b>Other information</b> |    |                                                                                                                                                                            |                    |
| 8 | Funding                  | 22 | Give the source of funding and the role of the funders for the present study and, if applicable, for the original study on which the present article is based              | page 15            |

\*Give information separately for exposed and unexposed groups.

**Note:** An Explanation and Elaboration article discusses each checklist item and gives methodological background and published examples of transparent reporting. The STROBE checklist is best used in conjunction with this article (freely available on the Web sites of PLoS Medicine at <http://www.plosmedicine.org/>, Annals of Internal Medicine at <http://www.annals.org/>, and Epidemiology at <http://www.epidem.com/>). Information on the STROBE Initiative is available at <http://www.strobe-statement.org>.

# BMJ Open

## Smoking and Atherosclerotic Cardiovascular Disease Risk in Young Men: The Korean Life Course Health Study

|                                 |                                                                                                                                                                                                                                                                                                                                                                                                                                                                                                        |
|---------------------------------|--------------------------------------------------------------------------------------------------------------------------------------------------------------------------------------------------------------------------------------------------------------------------------------------------------------------------------------------------------------------------------------------------------------------------------------------------------------------------------------------------------|
| Journal:                        | <i>BMJ Open</i>                                                                                                                                                                                                                                                                                                                                                                                                                                                                                        |
| Manuscript ID                   | bmjopen-2018-024453.R2                                                                                                                                                                                                                                                                                                                                                                                                                                                                                 |
| Article Type:                   | Research                                                                                                                                                                                                                                                                                                                                                                                                                                                                                               |
| Date Submitted by the Author:   | 24-Nov-2018                                                                                                                                                                                                                                                                                                                                                                                                                                                                                            |
| Complete List of Authors:       | Jee, Yongho; Seoul National University, Department of Public Health<br>Jung, Keum Ji; Yonsei University Graduate School Institute for Health Promotion, Dept. of Public Health<br>Lee, Sunmi; National Health Insurance Service, Health Insurance Policy Research Institute<br>Back, Joung Hwan; Health Insurance Policy Research Institute<br>Jee, Sun Ha; Graduate School of Public Health, Yonsei University, Epidemiology<br>Cho, Sung-il ; Seoul National University, Department of Public Health |
| <b>Primary Subject Heading</b>: | Epidemiology                                                                                                                                                                                                                                                                                                                                                                                                                                                                                           |
| Secondary Subject Heading:      | Smoking and tobacco, Public health, Cardiovascular medicine                                                                                                                                                                                                                                                                                                                                                                                                                                            |
| Keywords:                       | Smoking, Cardiovascular Disease, Young adults                                                                                                                                                                                                                                                                                                                                                                                                                                                          |
|                                 |                                                                                                                                                                                                                                                                                                                                                                                                                                                                                                        |

SCHOLARONE™  
Manuscripts

1  
2  
3  
4 Smoking and Atherosclerotic Cardiovascular Disease Risk in Young Men: The Korean  
5  
6 Life Course Health Study  
7  
8  
9

10  
11 Yongho Jee, MPH<sup>1,2</sup>, Keum Ji Jung, PhD<sup>2,4</sup>, Sunmi Lee, PhD<sup>3</sup>, Joung Hwan Back, PhD<sup>3</sup>,  
12  
13 Sun Ha Jee, PhD<sup>2,4\*</sup>, Sung-il Cho, MD, PhD<sup>1\*</sup>  
14  
15

16  
17  
18 <sup>1</sup> Department of Public Health, Seoul National University, Seoul, Republic of Korea  
19

20  
21 <sup>2</sup> Institute for Health Promotion, Graduate School of Public Health, Yonsei University,  
22  
23 Seoul, Republic of Korea  
24

25  
26 <sup>3</sup> Health Insurance Policy Research Institute, Wonju, Republic of Korea  
27

28  
29 <sup>4</sup> Department of Epidemiology and Health Promotion, Graduate School of Public  
30  
31 Health, Yonsei University, Seoul, Republic of Korea  
32  
33

34  
35  
36  
37  
38 Running title: Smoking is the first leading cause of Cardiovascular Disease  
39

40  
41  
42  
43 \*These last authors contributed equally to this work  
44

45  
46  
47 \*Corresponding authors. Department of Epidemiology and Health Promotion, Graduate  
48  
49 School of Public Health, Yonsei University, Seoul, Republic of Korea.  
50

51  
52 E-mail address: [jsunha@yuhs.ac](mailto:jsunha@yuhs.ac) (S.H. Jee).

53  
54 Department of Public Health, Seoul National University, Seoul, Republic of Korea  
55

56  
57 E-mail address: [scho@snu.ac.kr](mailto:scho@snu.ac.kr) (S.I. Cho).  
58

1  
2  
3  
4 These two authors equally contributed as corresponding author.  
5  
6  
7

8  
9 Word count: 3828  
10

11 Table 3, Figure 4  
12  
13  
14  
15  
16  
17  
18  
19  
20  
21  
22  
23  
24  
25  
26  
27  
28  
29  
30  
31  
32  
33  
34  
35  
36  
37  
38  
39  
40  
41  
42  
43  
44  
45  
46  
47  
48  
49  
50  
51  
52  
53  
54  
55  
56  
57  
58  
59  
60

For peer review only



## Abstract

**Objective:** To examine the effect of smoking on risk of atherosclerotic cardiovascular disease (ASCVD) in Korean young men and to examine whether serum total cholesterol levels could modify the effect of smoking on ASCVD.

**Design:** A prospective cohort study within a national insurance system.

**Setting:** Health screenings provided by national insurance in 1992 and 1994.

**Participants:** 118,531 young men between 20 and 29 years of age and were followed up for 23 years.

**Outcome measure:** To assess the independent effects of smoking on the risk of Ischemic Heart Disease (IHD), stroke, and ASCVD, Cox proportional hazards regression models were used, controlling for age, hypertension, diabetes, hypercholesterolemia, and alcohol drinking.

**Results:** The total number of current smokers was 78,455 (66.2%), and 94,113 (79.7%) of the sample recorded a total cholesterol level < 200 mg/dl measured at baseline. Between 1993 and 2015, 2,786 cases of IHD (53/100,000 person year), 2,368 cases of stroke (45.4/100,000 person year), and 6,368 ASCVD (122.7/100,000 person year) occurred. The risk of IHD, stroke, and total ASCVD events was found to increase for current smokers, with a hazard ratios (HR) with 95% Confidence Interval (CI) of 1.5 (95% CI: 1.3,1.6), 1.4 (95% CI: 1.2,1.6), and 1.4 (95% CI: 1.3,1.5), respectively. Further, the risks above were also found throughout the range of serum levels of cholesterol.

1  
2  
3  
4 **Conclusions:** Smoking among Korean young adult men was independently associated  
5  
6 with increased risk of IHD, stroke and ASCVD. The concentration of cholesterol in  
7  
8 Korean men did not modify the effect of smoking on ASCVD.  
9  
10

11 **Keywords:** Smoking, Cardiovascular Disease, Young adults  
12  
13  
14  
15  
16  
17  
18  
19  
20  
21  
22  
23

#### 24 **Strengths and limitations of this study**

- 25  
26  
27 ▪ Novel result from Korean young adults is that smoking is the first leading cause of  
28  
29 Cardiovascular Disease (CVD) while smoking is the second leading cause of CVD in  
30  
31 middle aged adults.  
32
- 33  
34  
35 ▪ The large sample size of cohort with 118,531 young men between 20 and 29 years of  
36  
37 age and were followed up for 23 years.  
38
- 39  
40  
41 ▪ The limitations of this study include possible measurement errors and the non-random  
42  
43 sample used.  
44  
45  
46  
47  
48  
49  
50  
51  
52  
53  
54  
55  
56  
57  
58  
59  
60

## INTRODUCTION

Atherosclerotic cardiovascular diseases (ASCVD) are the leading cause of death globally, with more people dying from ASCVD than any other causes of death annually. A total of 17.7 million people died as a result of ASCVDs in 2015 globally, comprising 31% of all deaths. Of these deaths, 7.4 million are estimated to have been the result of coronary heart disease, whilst 6.7 million were due to stroke<sup>1</sup>. According to previous studies published in the western countries, tobacco use has been reported to be a major risk factor for ASCVD following hypertension.<sup>1</sup>

A growing concern is that for young adults, cigarette smoking may be the first leading cause of ASCVD, owing to the high prevalence of cigarette smoking in comparison to lower levels of alternate risk factors, including hypertension, diabetes, and high cholesterol levels. However, despite these observations, there remain only a small number of studies considering the relationship between smoking and ASCVD in Korea and other countries in East Asia.<sup>2-5</sup>

Further, comparisons with Western populations may be less informative owing to the relatively lower levels of cholesterol commonly present in Asian countries. Biological studies have explored the interaction between smoking and serum cholesterol levels.<sup>6-9</sup> Nevertheless, very few studies have analyzed the interaction effects of smoking and serum cholesterol on ASCVD in young adults

‘World No Tobacco Day 2018’ is a campaign, with the primary objective of raising awareness of the link between tobacco use and negative health outcomes, predominantly heart and other cardiovascular diseases (CVD) including stroke. It will

1  
2  
3  
4 also seek to expand the range of potential strategies key public actors such as  
5  
6 governmental and public bodies can take to reduce the health risks of tobacco use. If  
7  
8 there is an established link between tobacco smoking in young adults and CVD, the  
9  
10 campaign will further increase awareness on smoking in young adults. The government  
11  
12 and the public can then subsequently take actions to reduce risks of smoking at earlier  
13  
14 stage. Unfortunately, however, the association between smoking and CVD in young  
15  
16 adults has not received much attention because at least a long term (over 20 years)  
17  
18 follow-up study is needed. This serves as motivation for this study, in which we aimed  
19  
20 to examine the effect of smoking on risk of ASCVD in Korean young adults with  
21  
22 relatively low serum cholesterol levels. We also investigated whether the effect of  
23  
24 smoking can be modified by serum levels of cholesterol.  
25  
26  
27  
28  
29  
30  
31  
32

## 33 **METHOD**

### 34 **Study participants**

35  
36  
37  
38 In Korea, the Korean Medical Insurance Corporation (KMIC) provided health insurance  
39  
40 for private school staff and civil servants prior to the current insurance system, under  
41  
42 which it was integrated as National Health Insurance.<sup>2</sup> A total of 4,862,438 (10.7%) of  
43  
44 the Korean population were covered by KMIC insurance, of which 1,297,833 were  
45  
46 employees, and 3,364,605 were dependents. All insured participants are required to  
47  
48 participate in a biennial health checkup.<sup>2</sup> Approximately 94% of the insured participants  
49  
50 in 1992 and 1994 were examined biennially. We established a prospective cohort for  
51  
52 participants (aged 20-29) who routinely responded to the questionnaire on disease risk  
53  
54  
55  
56  
57  
58  
59  
60

1  
2  
3  
4 factors and chronic diseases, naming this study the Korean Life Course Health Study  
5 (KLCHS). The KLCHS cohort included 307,041 Koreans (142,461 males, 164,580  
6  
7 females) who were screened by KMIC in 1992 and 1994. Of these participants, 205,840  
8  
9 (67.0%) were registered in 1992 and 101,201 (33.0%) were registered in 1994.  
10  
11  
12

13  
14 Of these 307,041 participants, 71,760 (23.4%) who had incomplete data height, blood  
15  
16 pressure, fasting glucose, total cholesterol, or body mass index were excluded. We also  
17  
18 excluded 6,170 people from our analysis who reported a past history of cancer and  
19  
20 ASCVD, as well as 2,091 people who had missing information on smoking, exercise, or  
21  
22 alcohol drinking, and 65 people who died before start of follow-up. Female participants  
23  
24 were excluded, because of the low prevalence of smoking for females in Korea,  
25  
26 resulting in a total of 118,531 eligible participants for the analysis. The study proposal  
27  
28 obtained an approval by the Institutional Review Board of Human Research, Yonsei  
29  
30 University (4-2001-0029). This study was a retrospective cohort using past routine  
31  
32 laboratory data and did not receive consent.  
33  
34  
35  
36  
37  
38  
39  
40

#### 41 **Data collection**

42  
43  
44 The biennial KMIC screening was provided at local hospitals by medical practitioners  
45  
46 according to standard protocols. During the two-year interval examination from 1992 to  
47  
48 2008, we examined the variables related to the lifestyle of participants, such as daily  
49  
50 smoking amount, duration of smoking, and variables related to drinking. From data  
51  
52 collected at baseline, participants were defined as ‘current smokers’ if they were  
53  
54 smoking currently, ‘never smokers’ if they had no prior history of smoking, and ‘ex-  
55  
56  
57  
58  
59  
60

1  
2  
3  
4 smokers' if they had previously smoked but at the time of measurement did not smoke.  
5  
6 Current smokers were further categorized by amount of cigarettes consumed on average  
7  
8 per day (1–9, 10–19, and 20 or greater) as well as duration of smoking (1–9, 10–19, and  
9  
10 20 or more years) following the example of previous studies.<sup>2,10,11</sup>  
11  
12

13  
14 The definition of hypertension was a systolic BP  $\geq$  140 mmHg or diastolic BP  $\geq$  90  
15  
16 mmHg.<sup>12</sup> Body mass index (BMI) was measured as weight (kg) / height (m)<sup>2</sup>. Serum  
17  
18 total cholesterol was grouped as desirable ( $<$ 200 mg/dl), borderline-high (200-239  
19  
20 mg/dl), and high ( $\geq$  240 mg/dl).<sup>13</sup> Definition of diabetes was fasting blood glucose  $\geq$   
21  
22 126 mg / dl.<sup>14</sup>  
23  
24  
25  
26  
27  
28  
29  
30

### 31 **Follow-up and outcomes**

32  
33 The main outcome variables used in the analysis were morbidity and mortality  
34  
35 categorized by IHD, stroke, and ASCVD. For IHD, alone (ICD 10 codes, I20–I25),  
36  
37 acute myocardial infarction (AMI) alone (I21), and angina pectoris (AP) alone (ICD 10  
38  
39 codes, I20) are used. For stroke, stroke alone (I60–I69) was used. Finally, with regard to  
40  
41 ASCVD, we used total ASCVD, including disease of hypertensive (I10–I15), ischemic  
42  
43 heart disease (I20–I25), all stroke (I60–I69), other heart disease (I44–I51), sudden death  
44  
45 (R96), and other vascular disease (I70–I74).  
46  
47  
48  
49  
50

51 The study outcomes were identified through diagnosis information recorded in hospital  
52  
53 admission, and from causes of death using death certificates. The study follow-up was  
54  
55 nearly 100% complete, as we were able to search ASCVD event data electronically by  
56  
57  
58  
59  
60

1  
2  
3  
4 KMIC registrants regarding the morbidity information of ASCVD. The period of  
5  
6 follow-up was 23 years from January 1st, 1993 to December 31st, 2015. Data on causes  
7  
8 of death were available during years 1993–2015, and incidence could be tracked during  
9  
10 years 1995–2015. The time frames over which these outcomes could be assessed varied  
11  
12 with data availability (Figure 1).  
13  
14

15  
16 A validation study was conducted by 20 internists from the Korean Society of  
17  
18 Cardiology in 2009.<sup>15</sup> For the participants who provided written permission for the use  
19  
20 of their personal information, 673 CHD events between 1994 and 2007 were confirmed  
21  
22 with individual hospital medical records, showing that 73% of designated myocardial  
23  
24 infarctions were valid. The validation study was updated in 2013 with a value of 93%.<sup>16</sup>  
25  
26 The validation study on mortality data has not been conducted.  
27  
28  
29  
30  
31  
32  
33

### 34 **Statistical analysis**

35  
36  
37 First, we examined relationships between smoking status and established ASCVD risk  
38  
39 factors at baseline. In considering continuous ASCVD risk factors, we used ordinary  
40  
41 least squares regression and coded smoking quantity as an ordinal variable. In this  
42  
43 study, the Mantel Haenszel method was applied for dichotomous variables.<sup>17</sup>  
44  
45  
46

47  
48 To assess the independent effects of smoking on the risk of IHD, stroke, and ASCVD,  
49  
50 Cox proportional hazards models were used, controlling for age and the confounding  
51  
52 variables such as hypertension, diabetes, high cholesterol, and alcohol drinking. The  
53  
54 proportional assumption was also tested utilizing Schoenfeld residuals, and the survival  
55  
56 curve according to smoking status was plotted using the life-table method. We used  
57  
58  
59  
60

1  
2  
3  
4 Levins formula for calculating population attributable risk (PAR).<sup>18</sup> In additional  
5  
6 analyses, we excluded all events that had occurred in the first 4 years of follow-up.  
7  
8 These analyses ensured sensitivity in our results. In all analyses, a two-sided  
9  
10 significance level of 0.05 was used.  
11  
12  
13  
14  
15  
16

### 17 **Patient and Public Involvement**

18  
19  
20 Patients and or public were not involved.  
21  
22  
23  
24  
25

### 26 **RESULTS**

27  
28 The average age of the study participants was  $26.7 \pm 2.0$  (SD) years. Among the  
29  
30 118,531 men, 78,455 (66.2%) were current smokers, 15,126 (12.8%) were ex-smokers,  
31  
32 and 92,403 (15.4%) had hypertension. For total cholesterol, 94,413 (79.7%) had a total  
33  
34 serum cholesterol level  $< 200$  mg/dL, 19,764 (16.6%) had a borderline level of 200-240  
35  
36 mg/dL, and 4,444 (3.8%) had a level of 240 mg/dL or higher. In terms of amount of  
37  
38 smoking, 28.9% smoked more than 20 cigarettes per day while 45.5% and 25.6% of  
39  
40 current smokers smoked 1 to 9 and 10 to 19 cigarettes per day, respectively. Among  
41  
42 current smokers, 92.0% smoked for less than 10 years while 7.6% and 0.4% of current  
43  
44 smokers smoked for 10 to 19 years and more than 20 years, respectively.  
45  
46  
47  
48

49  
50 Population characteristics by smoking status are presented in Table 1. After adjusting  
51  
52 for age, current smokers had a significantly higher body mass index (P for trend =  
53  
54 0.0056), higher consumption of alcohol drinking (P for trend  $< .0001$ ), and higher  
55  
56 prevalence of diabetes (P for trend = 0.0060) than nonsmokers.  
57  
58



1  
2  
3  
4 During 23 years of follow up (5,191,823 person-years), 2,786 (90 fatal) IHD cases  
5  
6 (53/100,000 person year), stroke cases 2,368 (126 fatal) (45.4/100,000 person year),  
7  
8 and 6,368 ASCVD cases (306 fatal) (122.7/100,000 person year) occurred  
9

10  
11  
12 The independent effects of smoking on IHD, stroke, and ASCVD were analyzed  
13  
14 controlling for confounding factors through Cox proportional hazards models, as shown  
15  
16 in Table 2. The hazard ratios (HR) relating to IHD for current smokers were 1.5 (P  
17  
18 <.0001), and those of ex-smokers were 1.0 (P=0.8567). The HR of stroke was 1.4 (P  
19  
20 <.0001) for current smokers and 1.1 (P = 0.5008) on ex-smokers.  
21  
22

23  
24 Compared to nonsmokers, the HR for any ASCVD event was 1.4 (P < 0.0001) in  
25  
26 current smokers and 1.1 in ex-smokers (P = 0.1406). Figure 2 shows the survival  
27  
28 probability by smoking history (never, former, 1-9, 10-19,  $\geq$  20 cigarette per day  
29  
30 among current smokers) and the corresponding unadjusted association with ASCVD.  
31  
32 The overall results demonstrated that smoking among young men increased the risk for  
33  
34 ASCVD relative to nonsmokers. After adjusting for age and traditional ASCVD risk  
35  
36 factors, the HRs for IHD and stroke were estimated for groups classified by amount of  
37  
38 smoking (A and B in Figure 3) and duration of smoking (C and D in Figure 3). For IHD  
39  
40 and stroke, the risk of events increased linearly with higher amount of cigarette per day  
41  
42 (P for trend, <.0001 and <.0001, respectively) and longer duration of smoking (P for  
43  
44 trend, <.0001 and <.0001, respectively).  
45  
46  
47  
48  
49

50  
51 To examine whether serum total cholesterol levels could modify the effect of smoking  
52  
53 on ASCVD, we divided the cohort participants into quartile of total cholesterol. The  
54  
55 risks above were also found throughout the range of serum levels of cholesterol  
56  
57

1  
2  
3  
4 demonstrating that serum total cholesterol levels did not modify the effect of smoking  
5  
6 on ASCVD (Figure 4).  
7  
8

9  
10 Estimated risk factor prevalence in current studies of smoking and other additional risk  
11  
12 factors were used to estimate the PARs for IHD alone, stroke alone and total ASCVD  
13  
14 (Table 3). For IHD, current smoking accounts for about 24.9% of events, and  
15  
16 hypertension accounts for 8.1% of events. In the case of stroke, smoking was estimated  
17  
18 to account for 20.9%, whilst hypertension was estimated to be responsible for 13.3% of  
19  
20 stroke cases.  
21  
22

## 23 24 25 26 27 **DISCUSSION**

28  
29 Our study investigated the association between smoking and risk of ASCVD among  
30  
31 Korean young men within a cohort study with a 23 year of follow-up. To our  
32  
33 knowledge, this is the first study focusing on Korean young adults. In our study,  
34  
35 smoking was the most crucial risk factor attributing to 20% of ASCVD mortality in  
36  
37 middle age.  
38  
39

40  
41  
42 Diabetes, hypertension, and hyperlipidemia are well known risk factors for ASCVD<sup>10</sup>.  
43  
44 However, for young adults with relatively low incidence of diabetes, hypertension and  
45  
46 hyperlipidemia, smoking is the most important and an independent risk factor for  
47  
48 predicting ASCVD in the present study. Furthermore, the high smoking rate among  
49  
50 young people is important with respect to the development of middle-aged hypertension  
51  
52 and transition to ASCVD.<sup>19-20</sup> Thus, middle-aged ASCVD morbidity is likely  
53  
54 predominantly predicted by smoking in young adulthood.  
55  
56  
57

1  
2  
3  
4 The body of research centered upon the health effects of smoking is steadily increasing,  
5  
6 with findings reported from many countries around the world. However, few studies  
7  
8 have examined the effect of smoking on ASCVD in young adults.<sup>21</sup> Here, we present  
9  
10 evidence that current smoking is an independent risk factor affecting the incidence of  
11  
12 IHD, stroke and ASCVD.  
13  
14

15  
16 These risk associations have been estimated across total serum cholesterol groups. A  
17  
18 cohort study in Hasayama Japan found that smoking showed positive association with  
19  
20 coronary heart disease in people with high levels of serum cholesterol above 180 mg /  
21  
22 dl, but not with people with low level of cholesterol less than 180 mg / dl.<sup>22-23</sup>  
23  
24 Afterward, six epidemiological studies were conducted. Among them, one study from  
25  
26 Puerto Rico Heart Health Program<sup>24</sup> showed similar results, but not all.<sup>7-11</sup> Of course,  
27  
28 all studies were conducted among adult populations. To the best of our knowledge, no  
29  
30 study has been done on young adults with much lower levels of serum cholesterol. In  
31  
32 addition, the high smoking rate among young adults is likely to be, even directly, linked  
33  
34 to high blood pressure among the adult population who developed ASCVD as a major  
35  
36 health problem.  
37  
38  
39  
40  
41

42  
43 In this study, the non-significant risk of ASCVD among ex-smokers can be interpreted  
44  
45 in two ways. First, this result may simply reflect the effect of smoking cessation. Most  
46  
47 previous studies have shown that the effects of smoking cessation are immediate in  
48  
49 CVD (most of the excess risk of vascular mortality due to smoking may be eliminated  
50  
51 rapidly upon cessation), while lung cancer occurs within 20 years<sup>25, 26</sup>. In particular,  
52  
53 most of the excess risk of vascular mortality due to smoking in women may be  
54  
55 eliminated rapidly upon cessation and within 20 years for lung diseases.<sup>26</sup> Second,  
56  
57 even if a number of young adult ex-smokers, aged 20-29 years, may have smoked  
58  
59 continuously from adolescence, it is still a short term of smoking, compared to adults.  
60  
Previous study shown that reducing adult smoking pays more immediate dividends,  
both in terms of health improvements and cost savings.<sup>27</sup> While present study lacks

1  
2  
3  
4 information on smoking duration of ex-smokers, current smokers who continued to  
5 smoke seem to have increased risk of CVD by 40%. Therefore, while the smoking  
6 duration of ex-smokers is unknown, it may be reasonable to consider the results were  
7 mainly affected by the smoking cessation. Further research on the effects of smoking  
8 cessation among young adults is necessary.  
9  
10

11 There are several studies regarding cardiovascular risk among young people. According  
12 to a study conducted by Bernaards et al.,<sup>28</sup> blood pressure and waist circumference were  
13 decreased by lowering weekly tobacco consumption in younger participants. However,  
14 they did not report the risk of developing cardiovascular disease events due to changes  
15 in smoking. This seems to be another significant topic relating to the health of young  
16 adults. Another study conducted by Morotti et al.<sup>21</sup> on young women with polycystic  
17 ovary syndrome (PCOS) reported an association between smoking habitude in lean  
18 PCOS patients, and the increase of soft markers of cardiovascular risk. For young adult  
19 African Americans, the association between cigarette smoking and carotid intima  
20 assuming the genetic variation of smokers was reported and the -930<sup>A/G</sup> polymorphism  
21 modified the association among young healthy adults.<sup>29</sup> The study on association  
22 between second hand smoking among childhood and cardiovascular event in adulthood  
23 was conducted and found that the carotid plaque risk in adulthood is increased in  
24 children whose parents had smoked.<sup>30-31</sup>  
25  
26  
27  
28  
29  
30  
31  
32  
33  
34  
35  
36  
37  
38  
39  
40  
41  
42  
43  
44

45 This LCHS study has several strengths, such as high follow-up rates and a large,  
46 national sample. The large sample size of cohort allowed us to investigate the  
47 association of smoking with various levels of serum cholesterol. The civil servants and  
48 private school teachers who participated in this study accounted for about 11% of the  
49 total population in 1992. We did not compare the characteristics of the 89% population  
50 not included in the study. Therefore, this study will not represent the whole population.  
51  
52  
53  
54  
55  
56  
57  
58  
59  
60

1  
2  
3  
4 Moreover, selection bias may be a potential issue, since the final sample contains a  
5 subset of over 118,531 young male adults (38.6%) out of 307,041 subjects initially  
6 selected for our study. We therefore urge conservative interpretations of our study  
7 results with regard to the general population.  
8  
9  
10  
11  
12  
13

14 In conclusion, smoking is a leading cause of ASCVD among young adults in Korea, a  
15 country with a low total cholesterol level and a high smoking rate. Moreover, the  
16 association was not modified by total cholesterol level. Smoking among Korean young  
17 adult men was independently associated with increased risk of IHD, stroke and  
18 ASCVD. The concentration of cholesterol in Korean men did not modify the effect of  
19 smoking on ASCVD. Therefore, smoking cessation on young adult smokers is essential  
20 to prevent CVD later in adult life. Moreover, clinical practice guidelines and policies  
21 should emphasize to treat nicotine addiction in young smokers.  
22  
23  
24  
25  
26  
27  
28  
29  
30  
31  
32  
33  
34  
35  
36  
37  
38  
39

40 **Acknowledgments:** We appreciate the assistance of the Korean National Health  
41 Insurance Service, which provided the data for this study.  
42  
43  
44  
45  
46  
47

48 **Contributors:** Data analysis was undertaken by YJ and KJJ. The article was drafted by  
49 YJ. SL, JHB, SHJ, and SC substantially contributed to the conception or design of the  
50 work, revising the work, approved the final version to be published, and agreed to be  
51 accountable for all aspects of the work in ensuring that questions related to the accuracy  
52  
53  
54  
55  
56  
57  
58  
59  
60

1  
2  
3  
4 or integrity of any part of the work are appropriately investigated and resolved.  
5  
6  
7  
8  
9

10 **Funding Sources:** This study was funded with a grant from the Korean Health  
11 Technology R&D Project, Ministry of Health & Welfare, Republic of Korea  
12 (HI14C2686). The funder had no role in the study design and data collection, in  
13 analyzing and interpreting data, or in the decision to submit this work for publication  
14  
15  
16  
17  
18  
19

20  
21  
22  
23 **Conflict of interests:** None declared  
24  
25  
26  
27  
28

29 **Ethics approval:** The study proposal obtained an approval by the Institutional Review  
30 Board of Human Research, Yonsei University (4-2001-0029).  
31  
32  
33

34 **Provenance and peer review:** Not commissioned; externally peer reviewed.  
35  
36  
37  
38

39 **Data sharing statement:** No additional data are available.  
40

## 41 REFERENCES

- 42  
43 1. World Health Organization. Cardiovascular diseases (CVDs). Fact sheet. Updated  
44 May 2017. <http://www.who.int/mediacentre/factsheets/fs317/en/>. Visited at 3 March,  
45 2018.  
46  
47  
48  
49  
50  
51 2. Jee SH, Samet JM, Ohrr H, Kim JH, Kim IS. Smoking and cancer risk in Korean  
52 men and women. *Cancer Causes Control*. 2004;15(4):341-8.  
53  
54  
55  
56  
57 3. Yuan JM, Ross RK, Wang XL, Gao YT, Henderson BE, Yu MC. Morbidity and  
58  
59  
60

1  
2  
3  
4 mortality in relation to cigarette smoking in Shanghai, China. *JAMA* 1996: 1646–50.

5  
6  
7 4. Liu B-Q, Peto R, Chen Z-M, et al. Emerging tobacco hazards in China: 1.  
8 Retrospective proportional mortality study of one million deaths. *Br Med J* 1998;317:  
9 1411–22.

10  
11  
12  
13  
14  
15 5. Niu S-R, Yang G-H, Chen Z-M, et al. Emerging tobacco hazards in China: 2. Early  
16 mortality results from a prospective study. *Br Med J* 1998;317: 1423–24.

17  
18  
19  
20  
21 6. Robertson TL, Kato H, Gordon T, Kagan A, Rhoads GG, Land CE, Worth RM,  
22 Belsky JL, Dock DS, Miyanishi M, Kawamoto S. Epidemiologic studies of coronary  
23 heart disease and stroke in Japanese men living in Japan, Hawaii and California.  
24 Coronary heart disease risk factors in Japan and Hawaii. *Am J Cardiol.* 1977;39(2):244-

25  
26  
27  
28  
29 9. PubMed PMID: 835483.

30  
31  
32  
33 7. Lawlor DA, Song YM, Sung J, Ebrahim S, Smith GD. The association of smoking  
34 and cardiovascular disease in a population with low cholesterol levels: a study of  
35 648,346 men from the Korean national health system prospective cohort study. *Stroke.*  
36  
37  
38 2008;39(3):760-7. doi: 10.1161/STROKEAHA.107.494823. Epub 2008 Jan 31.  
39 PubMed PMID: 18239177.

40  
41  
42  
43  
44  
45 8. Hozawa A, Okamura T, Kadowaki T, Murakami Y, Nakamura K, Hayakawa T, Kita  
46 Y, Nakamura Y, Okayama A; Hirotsugu Ueshima for NIPPON DATA80 Research  
47 group. Is weak association between cigarette smoking and cardiovascular disease  
48 mortality observed in Japan explained by low total cholesterol? NIPPON DATA80. *Int*  
49  
50  
51  
52  
53  
54  
55  
56  
57  
58  
59  
60  
*J Epidemiol.* 2007 Oct;36(5):1060-7. Epub 2007 Sep 10. PubMed PMID: 17846054.

- 1  
2  
3  
4 9. Nakamura K, Barzi F, Huxley R, Lam TH, Suh I, Woo J, Kim HC, Feigin VL, Gu D,  
5  
6 Woodward M; Asia Pacific Cohort Studies Collaboration. Does cigarette smoking  
7  
8 exacerbate the effect of total cholesterol and high-density lipoprotein cholesterol on the  
9  
10 risk of cardiovascular diseases? *Heart*. 2009;95(11):909-16. doi:  
11  
12 10.1136/hrt.2008.147066. Epub 2009 Feb 5. PubMed PMID: 19196734.  
13  
14  
15  
16 10. Jee SH, Suh I, Kim IS, Appel LJ. Smoking and atherosclerotic cardiovascular  
17  
18 disease in men with low levels of serum cholesterol: the Korea Medical Insurance  
19  
20 Corporation Study. *JAMA*. 1999;282(22):2149-55.  
21  
22  
23  
24 11. Jee SH, Park J, Jo I, Lee J, Yun S, Yun JE, Jang Y. Smoking and atherosclerotic  
25  
26 cardiovascular disease in women with lower levels of serum cholesterol.  
27  
28 *Atherosclerosis*. 2007;190(2):306-12. Epub 2006 May 4.  
29  
30  
31  
32 12. Chobanian AV, Bakris GL, Black HR, Cushman WC, Green LA, Izzo JL Jr, Jones  
33  
34 DW, Materson BJ, Oparil S, Wright JT Jr, Roccella EJ; National Heart, Lung, and  
35  
36 Blood Institute Joint National Committee on Prevention, Detection, Evaluation, and  
37  
38 Treatment of High Blood Pressure; National High Blood Pressure Education Program  
39  
40 Coordinating Committee. The Seventh Report of the Joint National Committee on  
41  
42 Prevention, Detection, Evaluation, and Treatment of High Blood Pressure: the JNC 7  
43  
44 report. *JAMA*. 2003;289(19):2560-72. Epub 2003 May 14. Erratum in: *JAMA*. 2003 Jul  
45  
46 9;290(2):197. PubMed PMID: 12748199.  
47  
48  
49  
50  
51 13. The National Cholesterol Education Program. Report of the Expert Panel on Blood  
52  
53 Cholesterol Levels in Children and Adolescents. NIH Publication No. 91-2732.  
54  
55  
56 Bethesda, MD; 1994.  
57  
58  
59  
60



- 1  
2  
3  
4 14. National Diabetes Data Group. Report of the Expert Committee on the Diagnostic  
5 Classification of Diabetes. *Diabetes Care*. 1997;20(7):1183–97.  
6  
7  
8  
9  
10 15. Kimm H, Yun JE, Lee SH, et al. Validity of the diagnosis of acute myocardial  
11 infarction in Korean national medical health insurance claims data: the Korean Heart  
12 Study (1). *Korean Circ J* 2012;42:10–15.  
13  
14  
15  
16  
17 16. Kim HY. Validity of the diagnosis of acute myocardial infarction in Korean  
18 national medical health insurance claims data: the Korean Heart Study [Master thesis].  
19 Yonsei University, Seoul, Korea, June 2013.  
20  
21  
22  
23  
24  
25 17. Breslow NE, Day NE. Statistical methods in cancer research. Vol. 1: The analysis  
26 of case-control studies. Lyon, France: IARC Scientific Publication No. 32, pp. 146–50.  
27  
28  
29  
30 18. Levin ML. The occurrence of lung cancer in man. *Acta Intern Cancer* 1953;19:531.  
31  
32  
33  
34 19. Thut AB, Blizzard L, Schmidt MD, Luc PH, Granger RH, Dwyer T. The association  
35 between smoking and hypertension in a population-based sample of Vietnamese men. *J*  
36 *Hypertens*. 2010; 28: 245 – 50.  
37  
38  
39  
40  
41 20. Kim BJ, Seo DC, Kim BS, Kang JH. Relationship between cotinine-verified  
42 smoking status and incidence of hypertension in 74,743 Korean adults. *Circ J*. 2018 Feb  
43 28. doi: 10.1253/circj.CJ-17-1188. [Epub ahead of print].  
44  
45  
46  
47  
48  
49 21. Morotti E, Battaglia B, Fabbri R, Paradisi R, Venturoli S, Battaglia C. Cigarette  
50 smoking and cardiovascular risk in young women with polycystic ovary syndrome. *Int*  
51 *J Fertil Steril*. 2014;7(4):301-12. Epub 2013 Dec 22.  
52  
53  
54  
55  
56  
57 22. Kiyohara Y, Ueda K, Fujishima M. Smoking and cardiovascular disease in the

1  
2  
3  
4 general population in Japan. *J Hypertens* 1990;8(Suppl 5):S9–S15.

5  
6  
7 23. Fujishima M, Kiyohara Y, Ueda K, Hasuo Y, Kato I, Iwamoto H. Smoking as  
8 cardiovascular risk factor in low cholesterol population: the Hisayama Study. *Clin Exp*  
9  
10  
11  
12 *Hypertens A*. 1992;14(1-2):99-108.

13  
14  
15 24. Gordon T, Garcia-Palmier MR, Kagan A, Kannel WB, Schiffman J. Differences in  
16 coronary heart disease in Framingham, Honolulu and Puerto Rico. *J Chronic Dis*.  
17  
18  
19  
20  
21 1974;27:329–44.

22  
23 25. Thun, M. J., Day-Lally, C., Myers, D. G., Calle, E. E., Flanders, W., Zhu, B., ... &  
24 Heath, C. W. (1982). Trends in tobacco smoking and mortality from cigarette use in  
25  
26  
27  
28  
29  
30  
31  
32  
33  
34  
35  
36  
37  
38  
39  
40  
41  
42  
43  
44  
45  
46  
47  
48  
49  
50  
51  
52  
53  
54  
55  
56  
57  
58  
59  
60  
Cancer Prevention Studies I (1959 through 1965) and II (1982 through 1988). National  
Cancer institute, smoking and tobacco control, monograph, 8.

26. Kenfield SA, Stampfer MJ, Rosner BA, Colditz GA. Smoking and smoking  
cessation in relation to mortality in women. *JAMA*. 2008;299(17):2037-47.

27. Lightwood JM, Glantz SA. Short-term economic and health benefits of smoking  
cessation: myocardial infarction and stroke. *Circulation*. 1997;96(4):1089-96.

28. Bernaards CM1, Twisk JW, Snel J, van Mechelen W, Kemper HC. In a prospective  
study in young people, associations between changes in smoking behavior and risk  
factors for cardiovascular disease were complex. *J Clin Epidemiol*. 2005  
Nov;58(11):1165-71.

29. Murtaugh KH, Borde-Perry WC, Campbell KL, Gidding SS, Falkner B. Obesity,  
smoking, and multiple cardiovascular risk factors in young adult African Americans.

1  
2  
3  
4 *Ethn Dis.* 2002 Summer;12(3):331-5.  
5  
6

7 30. West HW, Juonala M, Gall SL, Kähönen M, Laitinen T, Taittonen L, Viikari JS,  
8 aitakari OT, Magnussen CG. Exposure to parental smoking in childhood is associated  
9 with increased risk of carotid atherosclerotic plaque in adulthood: the Cardiovascular  
10 Risk in Young Finns Study. *Circulation.* 2015 Apr 7;131(14):1239-46. doi:  
11 10.1161/CIRCULATIONAHA.114.013485. Epub 2015 Mar 23.  
12  
13

14 31. Roy MP, Steptoe A, Kirschbaum C. Association between smoking status and  
15 cardiovascular and cortisol stress responsivity in healthy young men. *Int J Behav Med.*  
16 1994;1(3):264-83.  
17  
18  
19  
20  
21  
22  
23  
24  
25  
26  
27  
28  
29  
30  
31  
32  
33  
34  
35  
36  
37  
38  
39

#### 40 **Figure legends**

41  
42  
43 Figure 1. Timeline for data collection in the Korean Life Course Health Study  
44  
45  
46  
47

48  
49 Figure 2. Survival of atherosclerotic cardiovascular disease event by smoking history in  
50 Korean young adult men, 1992-2015  
51  
52  
53  
54  
55

56  
57 Figure 3. Hazard ratios with 95% confidence intervals for from ischemic heart disease,  
58  
59  
60

1  
2  
3  
4 and stroke by cigarette per day and duration of smoking  
5  
6  
7  
8  
9

10 Figure 4. Hazard ratios with 95% confidence intervals for ischemic heart disease and  
11 stroke by total cholesterol groups of smokers compared with nonsmokers: Each group  
12 of total cholesterol levels are as follows: first, 149 mg/dl; second, 150-169 mg/dL; third,  
13 170-194 mg/dL; fourth,  $\geq 195$  mg/dL. The reference group is non-smokers in each  
14 quartile of total cholesterol.  
15  
16  
17  
18  
19  
20  
21  
22  
23  
24  
25  
26  
27  
28  
29  
30  
31  
32  
33  
34  
35  
36  
37  
38  
39  
40  
41  
42  
43  
44  
45  
46  
47  
48  
49  
50  
51  
52  
53  
54  
55  
56  
57  
58  
59  
60

Table 1. Baseline Characteristics of the Korean Life Course Health Study, 1992-1994, According to Smoking Status\*

| Characteristic                     | Nonsmokers<br>(n=24,950) | Ex-smokers<br>(n=15,126) | No. of cigarettes per day among current smokers |                     |                   | P for<br>Trend†‡ |
|------------------------------------|--------------------------|--------------------------|-------------------------------------------------|---------------------|-------------------|------------------|
|                                    |                          |                          | 1-9<br>(n=22,642)                               | 10-19<br>(n=35,690) | ≥20<br>(n=20,123) |                  |
| Age, year                          | 26.6 (2.1)               | 26.9 (1.9)               | 26.6 (2.0)                                      | 26.8 (1.9)          | 26.8 (1.9)        | 0.1622           |
| Systolic Blood Pressure, mmHg      | 120.4 (11.6)             | 120.0 (11.8)             | 119.8 (11.6)                                    | 120.1 (11.6)        | 120.3 (11.6)      | 0.2558           |
| Diastolic Blood Pressure mmHg      | 78.0 (9.0)               | 77.7 (9.1)               | 77.5 (9.0)                                      | 77.8 (9.0)          | 78.0 (9.0)        | 0.1122           |
| Total cholesterol, mg/dL           | 173.4 (32.9)             | 173.4 (32.6)             | 172.9 (33.1)                                    | 174.5 (33.4)        | 177.2 (34.4)      | 0.9543           |
| Body mass index, kg/m <sup>2</sup> | 22.3 (2.4)               | 22.4 (2.4)               | 22.3 (2.4)                                      | 22.5 (2.5)          | 22.9 (2.6)        | 0.0056           |
| Fasting serum glucose, mg/dL       | 86.7 (13.3)              | 86.6 (13.5)              | 86.2 (14.1)                                     | 86.4 (14.1)         | 86.6 (15.3)       | 0.4821           |
| Alcohol consumption, g per day     | 7.3 (17.7)               | 9.7 (19.7)               | 12.2 (22.6)                                     | 14.5 (25.1)         | 20.4 (36.1)       | <.0001           |
| Conditions, %                      |                          |                          |                                                 |                     |                   |                  |
| Hypertension†                      | 15.7                     | 15.1                     | 14.5                                            | 15.6                | 15.7              | 0.7987           |
| Hypercholesterolemia‡              | 3.4                      | 3.3                      | 3.3                                             | 3.9                 | 4.7               | 0.0743           |
| Diabetes§                          | 0.7                      | 0.8                      | 0.9                                             | 0.9                 | 1.0               | 0.0060           |
| Alcohol use                        | 61.2                     | 81.3                     | 88.2                                            | 88.3                | 86.9              | 0.1035           |
| Physical activity                  | 24.9                     | 26.8                     | 22.9                                            | 17.5                | 13.0              | <.0001           |

\*Data are expressed as means (SD) unless otherwise indicated; †Systolic blood pressure of at least 140 mmHg and/or diastolic blood pressure of at least

1  
2  
3 90 mmHg; ‡Total cholesterol level of at least 6.21 mmol/L (240 mg/dL); § Fasting serum glucose value of at least 6.99 mmol/L (126 mg/L); || Consumption  
4 of Soju which is a colorless distilled beverage of Korean origin; ¶¶Testing for trend across nonsmokers and current smokers; ex-smokers were excluded.  
5  
6  
7  
8  
9  
10  
11  
12  
13  
14  
15  
16  
17  
18  
19  
20  
21  
22  
23  
24  
25  
26  
27  
28  
29  
30  
31  
32  
33  
34  
35  
36  
37  
38  
39  
40  
41  
42  
43  
44  
45  
46

For peer review only

Table 2. Risk of Morbidity from Ischemic Heart Disease, Cerebrovascular Disease, and Atherosclerotic Cardiovascular Disease in Korean Men in the Korean Life Course Health Study, 1992-2015\*

| Variables and Categories    | Ischemic Heart Disease |        | Cerebrovascular Disease |        | Atherosclerotic Cardiovascular Disease |        |
|-----------------------------|------------------------|--------|-------------------------|--------|----------------------------------------|--------|
|                             | HR (95% CI)            | P      | HR (95% CI)             | P      | HR (95% CI)                            | P      |
| Age (5-year age group)      | 1.4 (1.2 – 1.6)        | <.0001 | 1.4 (1.3 – 1.6)         | <.0001 | 1.3 (1.2 – 1.4)                        | <.0001 |
| Cigarette smoking           |                        |        |                         |        |                                        |        |
| Ex-smoker                   | 1.0 (0.9 – 1.2)        | 0.8567 | 1.1 (0.9 – 1.3)         | 0.5008 | 1.1 (1.0 – 1.2)                        | 0.1406 |
| Current smoker              | 1.5 (1.3 – 1.6)        | <.0001 | 1.4 (1.2 – 1.6)         | <.0001 | 1.4 (1.3 – 1.5)                        | <.0001 |
| Blood Pressure†             |                        |        |                         |        |                                        |        |
| High normal                 | 1.2 (1.1 – 1.4)        | <.0001 | 1.2 (1.0 – 1.3)         | 0.0152 | 1.2 (1.1 – 1.3)                        | <.0001 |
| Stage 1 hypertension        | 1.6 (1.4 – 1.8)        | <.0001 | 1.7 (1.5 – 2.0)         | <.0001 | 1.7 (1.5 – 1.8)                        | <.0001 |
| Stage 2 hypertension        | 2.0 (1.6 – 2.5)        | <.0001 | 3.2 (2.5 – 4.0)         | <.0001 | 2.9 (2.5 – 3.3)                        | <.0001 |
| Total cholesterol‡          |                        |        |                         |        |                                        |        |
| Borderline-high cholesterol | 1.4 (1.3 – 1.6)        | <.0001 | 1.4 (1.3 – 1.6)         | <.0001 | 1.4 (1.3 – 1.5)                        | <.0001 |
| High cholesterol            | 2.5 (2.1 – 2.8)        | <.0001 | 1.7 (1.4 – 2.1)         | <.0001 | 2.1 (1.8 – 2.3)                        | <.0001 |
| Fasting blood sugar§        |                        |        |                         |        |                                        |        |
| Diabetes                    | 1.3 (0.9 – 1.9)        | 0.1375 | 1.6 (1.1 – 2.3)         | 0.0222 | 1.5 (1.2 – 1.9)                        | 0.0008 |
| Physical activity           |                        |        |                         |        |                                        |        |
| No exercise                 | 1.1 (1.0 – 1.3)        | 0.0122 | 1.1 (1.0 – 1.3)         | 0.2156 | 1.1 (1.0 – 1.3)                        | 0.0075 |

\*Hazard ratio (HRs) and 95% confidence intervals (CIs) from multivariable Cox proportional hazards models. †The reference category is normal (systolic

1  
2  
3 blood pressure<140 mmHg and diastolic blood pressure<90mm Hg). ‡ The reference category is desirable (serum cholesterol level, < 5.17 mmol/L [200  
4 mg/dL]). §The reference category is a fasting serum glucose level of less than 6.99 mmol/L (126 mg/dL).  
5  
6  
7  
8  
9  
10  
11  
12  
13  
14  
15  
16  
17  
18  
19  
20  
21  
22  
23  
24  
25  
26  
27  
28  
29  
30  
31  
32  
33  
34  
35  
36  
37  
38  
39  
40  
41  
42  
43  
44  
45  
46

For peer review only



Table 3. Population Attributable Risks (PARs) and 95% Confidence Intervals (CIs) From Smoking and Other Risk Factors of Ischemic Heart Disease, Cerebrovascular Disease, and Atherosclerotic Cardiovascular Disease in Korean Men: The Korean Life Course Health Study

| Variables and Categories    | Prevalence<br>% | Ischemic Heart Disease<br>PAR (95% CI) | Cerebrovascular Disease<br>PAR (95% CI) | Atherosclerotic Cardiovascular Disease<br>PAR (95% CI) |
|-----------------------------|-----------------|----------------------------------------|-----------------------------------------|--------------------------------------------------------|
| <b>Smoking</b>              |                 |                                        |                                         |                                                        |
| Current smoker              | 66.2            | 24.9 (16.6 – 28.4)                     | 20.9 (11.7 -28.4)                       | 20.9 (16.5 – 24.9)                                     |
| <b>Blood Pressure*</b>      |                 |                                        |                                         |                                                        |
| Hypertension                | 22.0            | 8.1 (6.2 – 9.9)                        | 13.3 (9.9 – 14.9 )                      | 9.9 (9.9 – 11.7)                                       |
| <b>Total cholesterol†</b>   |                 |                                        |                                         |                                                        |
| Borderline                  | 16.6            | 6.2 (4.7 – 9.1)                        | 6.2 (4.7 – 7.7)                         | 6.2 (4.7 – 7.6)                                        |
| High                        | 3.8             | 5.4 (4.0 – 6.4)                        | 4.0 (2.9 – 4.7)                         | 4.0 (2.9 – 4.7)                                        |
| <b>Fasting blood sugar‡</b> |                 |                                        |                                         |                                                        |
| Diabetes                    | 0.9             | 0.3 (-0.9 – 0.8)                       | 0.5 (0.08 – 1.1)                        | 0.4 (0.2 – 0.8)                                        |
| <b>Physical activity</b>    |                 |                                        |                                         |                                                        |
| No exercise                 | 0.8             | 7.4 (0 – 19.3)                         | 7.4 (0 – 19.3)                          | 7.4 (0 – 19.3)                                         |

\*The reference category is normal (systolic blood pressure < 140 mmHg and diastolic blood pressure < 90mm Hg). †The reference category is desirable (serum cholesterol level < 5.17 mmol/L [200 mg/dL]). ‡ The reference category is a fasting serum glucose level of less than 6.99 mmol/L (126 mg/dL).

1  
2  
3  
4  
5  
6  
7  
8  
9  
10  
11  
12  
13  
14  
15  
16  
17  
18  
19  
20  
21  
22  
23  
24  
25  
26  
27  
28  
29  
30  
31  
32  
33  
34  
35  
36  
37  
38  
39  
40  
41  
42  
43  
44  
45  
46  
47  
48  
49  
50  
51  
52  
53  
54  
55  
56  
57  
58  
59  
60

Figure 1

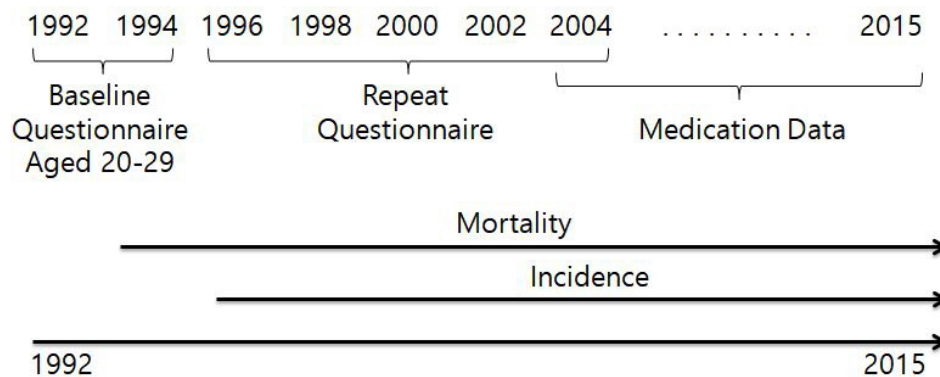

69x33mm (300 x 300 DPI)

1  
2  
3  
4  
5  
6  
7  
8  
9  
10  
11  
12  
13  
14  
15  
16  
17  
18  
19  
20  
21  
22  
23  
24  
25  
26  
27  
28  
29  
30  
31  
32  
33  
34  
35  
36  
37  
38  
39  
40  
41  
42  
43  
44  
45  
46  
47  
48  
49  
50  
51  
52  
53  
54  
55  
56  
57  
58  
59  
60



Figure 2

254x190mm (300 x 300 DPI)

Figure 3.

A. Ischemic Heart Disease



B. Ischemic Heart Disease



C. Stroke



D. Stroke



E. ASCVD



F. ASCVD



46x53mm (300 x 300 DPI)

1  
2  
3  
4  
5  
6  
7  
8  
9  
10  
11  
12  
13  
14  
15  
16  
17  
18  
19  
20  
21  
22  
23  
24  
25  
26  
27  
28  
29  
30  
31  
32  
33  
34  
35  
36  
37  
38  
39  
40  
41  
42  
43  
44  
45  
46  
47  
48  
49  
50  
51  
52  
53  
54  
55  
56  
57  
58  
59  
60

Figure 4.



46x94mm (300 x 300 DPI)

Title: smoking is the first leading cause of cardiovascular disease in Young Men.

STROBE Statement—Checklist of items that should be included in reports of cohort studies

|                           | Item No | Recommendation                                                                                                                                                                                                                                                                                                                                                                                                                                 |
|---------------------------|---------|------------------------------------------------------------------------------------------------------------------------------------------------------------------------------------------------------------------------------------------------------------------------------------------------------------------------------------------------------------------------------------------------------------------------------------------------|
| <b>Title and abstract</b> | ①       | (a) Indicate the study's design with a commonly used term in the title or the abstract <i>Page 3</i><br>(b) Provide in the abstract an informative and balanced summary of what was done and what was found <i>page 3</i>                                                                                                                                                                                                                      |
| <b>Introduction</b>       |         |                                                                                                                                                                                                                                                                                                                                                                                                                                                |
| Background/rationale      | ②       | Explain the scientific background and rationale for the investigation being reported <i>page 5</i>                                                                                                                                                                                                                                                                                                                                             |
| Objectives                | ③       | State specific objectives, including any prespecified hypotheses <i>page 6, para 1.</i>                                                                                                                                                                                                                                                                                                                                                        |
| <b>Methods</b>            |         |                                                                                                                                                                                                                                                                                                                                                                                                                                                |
| Study design              | ④       | Present key elements of study design early in the paper <i>Page 6, para 2</i>                                                                                                                                                                                                                                                                                                                                                                  |
| Setting                   | ⑤       | Describe the setting, locations, and relevant dates, including periods of recruitment, exposure, follow-up, and data collection <i>page 6-7.</i>                                                                                                                                                                                                                                                                                               |
| Participants              | ⑥       | (a) Give the eligibility criteria, and the sources and methods of selection of participants. Describe methods of follow-up <i>page 6, page 8</i><br>(b) For matched studies, give matching criteria and number of exposed and unexposed                                                                                                                                                                                                        |
| Variables                 | ⑦       | Clearly define all outcomes, exposures, predictors, potential confounders, and effect modifiers. Give diagnostic criteria, if applicable <i>page 7, para 3, page 8</i>                                                                                                                                                                                                                                                                         |
| Data sources/ measurement | ⑧*      | For each variable of interest, give sources of data and details of methods of assessment (measurement). Describe comparability of assessment methods if there is more than one group <i>page 6, page 7</i>                                                                                                                                                                                                                                     |
| Bias                      | ⑨       | Describe any efforts to address potential sources of bias <i>page 14.</i>                                                                                                                                                                                                                                                                                                                                                                      |
| Study size                | ⑩       | Explain how the study size was arrived at <i>page 7</i>                                                                                                                                                                                                                                                                                                                                                                                        |
| Quantitative variables    | ⑪       | Explain how quantitative variables were handled in the analyses. If applicable, describe which groupings were chosen and why <i>page 8</i>                                                                                                                                                                                                                                                                                                     |
| Statistical methods       | ⑫       | (a) Describe all statistical methods, including those used to control for confounding <i>page 9</i><br>(b) Describe any methods used to examine subgroups and interactions<br>(c) Explain how missing data were addressed<br>(d) If applicable, explain how loss to follow-up was addressed <i>page 8</i><br>(e) Describe any sensitivity analyses <i>page 9-10</i>                                                                            |
| <b>Results</b>            |         |                                                                                                                                                                                                                                                                                                                                                                                                                                                |
| Participants              | ⑬*      | (a) Report numbers of individuals at each stage of study—eg numbers potentially eligible, examined for eligibility, confirmed eligible, included in the study, completing follow-up, and analysed <i>page 10</i><br>(b) Give reasons for non-participation at each stage<br>(c) Consider use of a flow diagram <i>page 7. (Figure 1)</i>                                                                                                       |
| Descriptive data          | ⑭*      | (a) Give characteristics of study participants (eg demographic, clinical, social) and information on exposures and potential confounders <i>page 10</i><br>(b) Indicate number of participants with missing data for each variable of interest<br>(c) Summarise follow-up time (eg, average and total amount) <i>page 10 (23 years of follow-up)</i>                                                                                           |
| Outcome data              | ⑮*      | Report numbers of outcome events or summary measures over time <i>page 10.</i>                                                                                                                                                                                                                                                                                                                                                                 |
| Main results              | ⑯       | (a) Give unadjusted estimates and, if applicable, confounder-adjusted estimates and their precision (eg, 95% confidence interval). Make clear which confounders were adjusted for and why they were included <i>page 10, para 1 (Table 2)</i><br>(b) Report category boundaries when continuous variables were categorized<br>(c) If relevant, consider translating estimates of relative risk into absolute risk for a meaningful time period |

|   |                          |    |                                                                                                                                                                            |                    |
|---|--------------------------|----|----------------------------------------------------------------------------------------------------------------------------------------------------------------------------|--------------------|
| 1 | Other analyses           | 17 | Report other analyses done—eg analyses of subgroups and interactions, and sensitivity analyses                                                                             | page 11 (Figure 4) |
| 2 | <b>Discussion</b>        |    |                                                                                                                                                                            |                    |
| 3 | Key results              | 18 | Summarise key results with reference to study objectives                                                                                                                   | page 12 para 2     |
| 4 | Limitations              | 19 | Discuss limitations of the study, taking into account sources of potential bias or imprecision. Discuss both direction and magnitude of any potential bias                 | page 14, para 2.   |
| 5 | Interpretation           | 20 | Give a cautious overall interpretation of results considering objectives, limitations, multiplicity of analyses, results from similar studies, and other relevant evidence | page 14            |
| 6 | Generalisability         | 21 | Discuss the generalisability (external validity) of the study results                                                                                                      | page 14            |
| 7 | <b>Other information</b> |    |                                                                                                                                                                            |                    |
| 8 | Funding                  | 22 | Give the source of funding and the role of the funders for the present study and, if applicable, for the original study on which the present article is based              | page 15            |

\*Give information separately for exposed and unexposed groups.

**Note:** An Explanation and Elaboration article discusses each checklist item and gives methodological background and published examples of transparent reporting. The STROBE checklist is best used in conjunction with this article (freely available on the Web sites of PLoS Medicine at <http://www.plosmedicine.org/>, Annals of Internal Medicine at <http://www.annals.org/>, and Epidemiology at <http://www.epidem.com/>). Information on the STROBE Initiative is available at <http://www.strobe-statement.org>.

# BMJ Open

## Smoking and Atherosclerotic Cardiovascular Disease Risk in Young Men: The Korean Life Course Health Study

|                                 |                                                                                                                                                                                                                                                                                                                                                                                                                                                                                                        |
|---------------------------------|--------------------------------------------------------------------------------------------------------------------------------------------------------------------------------------------------------------------------------------------------------------------------------------------------------------------------------------------------------------------------------------------------------------------------------------------------------------------------------------------------------|
| Journal:                        | <i>BMJ Open</i>                                                                                                                                                                                                                                                                                                                                                                                                                                                                                        |
| Manuscript ID                   | bmjopen-2018-024453.R3                                                                                                                                                                                                                                                                                                                                                                                                                                                                                 |
| Article Type:                   | Research                                                                                                                                                                                                                                                                                                                                                                                                                                                                                               |
| Date Submitted by the Author:   | 16-Feb-2019                                                                                                                                                                                                                                                                                                                                                                                                                                                                                            |
| Complete List of Authors:       | Jee, Yongho; Seoul National University, Department of Public Health<br>Jung, Keum Ji; Yonsei University Graduate School Institute for Health Promotion, Dept. of Public Health<br>Lee, Sunmi; National Health Insurance Service, Health Insurance Policy Research Institute<br>Back, Joung Hwan; Health Insurance Policy Research Institute<br>Jee, Sun Ha; Graduate School of Public Health, Yonsei University, Epidemiology<br>Cho, Sung-il ; Seoul National University, Department of Public Health |
| <b>Primary Subject Heading</b>: | Epidemiology                                                                                                                                                                                                                                                                                                                                                                                                                                                                                           |
| Secondary Subject Heading:      | Smoking and tobacco, Public health, Cardiovascular medicine                                                                                                                                                                                                                                                                                                                                                                                                                                            |
| Keywords:                       | Smoking, Cardiovascular Disease, Young adults                                                                                                                                                                                                                                                                                                                                                                                                                                                          |
|                                 |                                                                                                                                                                                                                                                                                                                                                                                                                                                                                                        |

SCHOLARONE™  
Manuscripts



1  
2  
3  
4 Smoking and Atherosclerotic Cardiovascular Disease Risk in Young Men: The Korean  
5  
6 Life Course Health Study  
7  
8  
9

10  
11 Yongho Jee, MPH<sup>1,2</sup>, Keum Ji Jung, PhD<sup>2,4</sup>, Sunmi Lee, PhD<sup>3</sup>, Joung Hwan Back, PhD<sup>3</sup>,  
12  
13 Sun Ha Jee, PhD<sup>2,4\*</sup>, Sung-il Cho, MD, PhD<sup>1\*</sup>  
14  
15

16  
17  
18 <sup>1</sup> Department of Public Health Science, Graduate School of Public Health, Seoul  
19  
20 National University, Seoul, Republic of Korea  
21  
22

23 <sup>2</sup> Institute for Health Promotion, Graduate School of Public Health, Yonsei University,  
24  
25 Seoul, Republic of Korea  
26  
27

28  
29 <sup>3</sup> Health Insurance Policy Research Institute, Wonju, Republic of Korea  
30  
31

32 <sup>4</sup> Department of Epidemiology and Health Promotion, Graduate School of Public Health,  
33  
34 Yonsei University, Seoul, Republic of Korea  
35  
36

37  
38  
39  
40 Running title: Smoking and Atherosclerotic Cardiovascular Disease  
41  
42  
43  
44  
45

46 \*These last authors contributed equally to this work  
47  
48

49 \*Corresponding authors.  
50

51 Department of Public Health Science, Graduate School of Public Health, Seoul  
52  
53 National University, Seoul, Republic of Korea  
54  
55

56  
57 E-mail address: [scho@snu.ac.kr](mailto:scho@snu.ac.kr) (S.I. Cho).  
58

1  
2  
3  
4 Department of Epidemiology and Health Promotion, Graduate School of Public Health,  
5  
6 Yonsei University, Seoul, Republic of Korea.  
7

8  
9 E-mail address: [jsunha@yuhs.ac](mailto:jsunha@yuhs.ac) (S.H. Jee).  
10

11 These two authors equally contributed as corresponding author.  
12  
13  
14

15  
16 Word count: 3,048  
17

18 Table 3, Figure 4  
19  
20  
21  
22  
23  
24  
25  
26  
27  
28  
29  
30  
31  
32  
33  
34  
35  
36  
37  
38  
39  
40  
41  
42  
43  
44  
45  
46  
47  
48  
49  
50  
51  
52  
53  
54  
55  
56  
57  
58  
59  
60

For peer review only

## Abstract

**Objective:** To examine the effect of smoking on risk of atherosclerotic cardiovascular disease (ASCVD) in Korean young men and to examine whether serum total cholesterol levels could modify the effect of smoking on ASCVD.

**Design:** A prospective cohort study within a national insurance system.

**Setting:** Health screenings provided by national insurance in 1992 and 1994.

**Participants:** 118,531 young men between 20 and 29 years of age and were followed up for an average of 23 years.

**Outcome measure:** To assess the independent effects of smoking on the risk of Ischemic Heart Disease (IHD), stroke, and ASCVD, Cox proportional hazards regression models were used, controlling for age, hypertension, diabetes, hypercholesterolemia, and alcohol drinking.

**Results:** The total number of current smokers was 78,455 (66.2%), and 94,113 (79.7%) of the sample recorded a total cholesterol level < 200 mg/dl measured at baseline. Between 1993 and 2015, 2,786 cases of IHD (53/100,000 person year), 2,368 cases of stroke (45.4/100,000 person year), and 6,368 ASCVD (122.7/100,000 person year) occurred. The risk of IHD, stroke, and total ASCVD events was found to increase for current smokers, with a hazard ratios (HR) with 95% Confidence Interval (CI) of 1.5 (95% CI: 1.3,1.6), 1.4 (95% CI: 1.2,1.6), and 1.4 (95% CI: 1.3,1.5), respectively. Further, the risks above were also found throughout the range of serum levels of cholesterol.

1  
2  
3  
4 **Conclusions:** Smoking among Korean young adult men was independently associated  
5  
6 with increased risk of IHD, stroke and ASCVD. The concentration of cholesterol in  
7  
8 Korean men did not modify the effect of smoking on ASCVD.  
9

10  
11  
12 **Keywords:** Smoking, Cardiovascular Disease, Young adults  
13  
14  
15  
16  
17  
18  
19  
20  
21  
22  
23

#### 24 **Strengths and limitations of this study**

- 25  
26  
27 ▪ Novel result from Korean young adults is that smoking is the first leading cause of  
28  
29 Cardiovascular Disease (CVD) while smoking is the second leading cause of CVD in  
30  
31 middle aged adults.  
32
- 33  
34  
35 ▪ The large sample size of cohort with 118,531 young men between 20 and 29 years of  
36  
37 age and were followed up for an average of 23 years.  
38
- 39  
40  
41 ▪ The limitations of this study include possible measurement errors and the non-random  
42  
43 sample used.  
44  
45  
46  
47  
48  
49  
50  
51  
52  
53  
54  
55  
56  
57  
58  
59  
60

## INTRODUCTION

Atherosclerotic cardiovascular diseases (ASCVD) are the leading cause of death globally, with more people dying from ASCVD than any other causes of death annually. A total of 17.7 million people died as a result of ASCVDs in 2015 globally, comprising 31% of all deaths. Of these deaths, 7.4 million are estimated to have been the result of coronary heart disease, whilst 6.7 million were due to stroke<sup>1</sup>. According to previous studies published in the western countries, tobacco use has been reported to be a major risk factor for ASCVD following hypertension.<sup>1</sup>

A growing concern is that for young adults, cigarette smoking may be the first leading cause of ASCVD, owing to the high prevalence of cigarette smoking in comparison to lower levels of alternate risk factors, including hypertension, diabetes, and high cholesterol levels. However, despite these observations, there remain only a small number of studies considering the relationship between smoking and ASCVD in Korea and other countries in East Asia.<sup>2-5</sup>

Further, comparisons with Western populations may be less informative owing to the relatively lower levels of cholesterol commonly present in Asian countries. Biological studies have explored the interaction between smoking and serum cholesterol levels.<sup>6-9</sup> Nevertheless, very few studies have analyzed the interaction effects of smoking and serum cholesterol on ASCVD in young adults

‘World No Tobacco Day 2018’ is a campaign, with the primary objective of raising awareness of the link between tobacco use and negative health outcomes, predominantly heart and other cardiovascular diseases (CVD) including stroke. It will

1  
2  
3  
4 also seek to expand the range of potential strategies key public actors such as  
5  
6 governmental and public bodies can take to reduce the health risks of tobacco use. If  
7  
8 there is an established link between tobacco smoking in young adults and CVD, the  
9  
10 campaign will further increase awareness on smoking in young adults. The government  
11  
12 and the public can then subsequently take actions to reduce risks of smoking at earlier  
13  
14 stage. Unfortunately, however, the association between smoking and CVD in young  
15  
16 adults has not received much attention because at least a long term (over 20 years)  
17  
18 follow-up study is needed. This serves as motivation for this study, in which we aimed  
19  
20 to examine the effect of smoking on risk of ASCVD in Korean young adults with  
21  
22 relatively low serum cholesterol levels. We also investigated whether the effect of  
23  
24 smoking can be modified by serum levels of cholesterol.  
25  
26  
27  
28  
29  
30  
31  
32

## 33 **METHOD**

### 34 **Study participants**

35  
36  
37  
38 In Korea, the Korean Medical Insurance Corporation (KMIC) provided health insurance  
39  
40 for private school staff and civil servants prior to the current insurance system, under  
41  
42 which it was integrated as National Health Insurance.<sup>2</sup> A total of 4,862,438 (10.7%) of  
43  
44 the Korean population were covered by KMIC insurance, of which 1,297,833 were  
45  
46 employees, and 3,364,605 were dependents. All insured participants are required to  
47  
48 participate in a biennial health checkup.<sup>2</sup> Approximately 94% of the insured participants  
49  
50 in 1992 and 1994 were examined biennially. We established a prospective cohort for  
51  
52 participants (aged 20-29) who routinely responded to the questionnaire on disease risk  
53  
54  
55  
56  
57  
58  
59  
60

1  
2  
3  
4 factors and chronic diseases, naming this study the Korean Life Course Health Study  
5 (KLCHS). The KLCHS cohort included 307,041 Koreans (142,461 males, 164,580  
6  
7 females) who were screened by KMIC in 1992 and 1994. Of these participants, 205,840  
8  
9 (67.0%) were registered in 1992 and 101,201 (33.0%) were registered in 1994.  
10  
11  
12

13  
14 Of these 307,041 participants, 71,760 (23.4%) who had incomplete data height, blood  
15  
16 pressure, fasting glucose, total cholesterol, or body mass index were excluded. We also  
17  
18 excluded 6,170 people from our analysis who reported a past history of cancer and  
19  
20 ASCVD, as well as 2,091 people who had missing information on smoking, exercise, or  
21  
22 alcohol drinking, and 65 people who died before start of follow-up. Female participants  
23  
24 were excluded, because of the low prevalence of smoking for females in Korea,  
25  
26 resulting in a total of 118,531 eligible participants for the analysis. The study proposal  
27  
28 obtained an approval by the Institutional Review Board of Human Research, Yonsei  
29  
30 University (4-2001-0029) and the Seoul National University (E1812/001-010). This  
31  
32 study was a retrospective cohort using past routine laboratory data and did not receive  
33  
34 consent.  
35  
36  
37  
38  
39  
40  
41  
42  
43

#### 44 **Data collection**

45  
46 The biennial KMIC screening was provided at local hospitals by medical practitioners  
47  
48 according to standard protocols. During the two-year interval examination from 1992 to  
49  
50 2008, we examined the variables related to the lifestyle of participants, such as daily  
51  
52 smoking amount, duration of smoking, and variables related to drinking. From data  
53  
54 collected at baseline, participants were defined as 'current smokers' if they were  
55  
56  
57  
58  
59  
60

1  
2  
3  
4 smoking currently, 'never smokers' if they had no prior history of smoking, and 'ex-  
5 smokers' if they had previously smoked but at the time of measurement did not smoke.  
6  
7  
8  
9 Current smokers were further categorized by amount of cigarettes consumed on average  
10  
11 per day (1–9, 10–19, and 20 or greater) as well as duration of smoking (1–9, 10–19, and  
12  
13 20 or more years) following the example of previous studies.<sup>2,10,11</sup>  
14

15  
16 The definition of hypertension was a systolic BP  $\geq$  140 mmHg or diastolic BP  $\geq$  90  
17  
18 mmHg.<sup>12</sup> Body mass index (BMI) was measured as weight (kg) / height (m)<sup>2</sup>. Serum  
19  
20 total cholesterol was grouped as desirable (<200 mg/dl), borderline-high (200-239  
21  
22 mg/dl), and high ( $\geq$  240 mg/dl).<sup>13</sup> Definition of diabetes was fasting blood glucose  $\geq$   
23  
24  
25  
26  
27 126 mg / dl.<sup>14</sup>  
28  
29  
30  
31  
32

### 33 **Follow-up and outcomes**

34  
35  
36 The main outcome variables used in the analysis were morbidity and mortality  
37  
38 categorized by IHD, stroke, and ASCVD. For IHD, alone (ICD 10 codes, I20–I25),  
39  
40 acute myocardial infarction (AMI) alone (I21), and angina pectoris (AP) alone (ICD 10  
41  
42 codes, I20) are used. For stroke, stroke alone (I60–I69) was used. Finally, with regard to  
43  
44 ASCVD, we used total ASCVD, including disease of hypertensive (I10–I15), ischemic  
45  
46 heart disease (I20–I25), all stroke (I60–I69), other heart disease (I44–I51), sudden death  
47  
48 (R96), and other vascular disease (I70–I74).  
49  
50  
51  
52

53 The study outcomes were identified through diagnosis information recorded in hospital  
54  
55 admission, and from causes of death using death certificates. The study follow-up was  
56  
57  
58  
59  
60



1  
2  
3  
4 nearly 100% complete, as we were able to search ASCVD event data electronically by  
5  
6 KMIC registrants regarding the morbidity information of ASCVD. The period of  
7  
8 follow-up was 23 years from January 1st, 1993 to December 31st, 2015. Data on causes  
9  
10 of death were available during years 1993–2015, and incidence could be tracked during  
11  
12 years 1995–2015. The time frames over which these outcomes could be assessed varied  
13  
14 with data availability (Figure 1).  
15  
16

17  
18 A validation study was conducted by 20 internists from the Korean Society of  
19  
20 Cardiology in 2009.<sup>15</sup> For the participants who provided written permission for the use  
21  
22 of their personal information, 673 CHD events between 1994 and 2007 were confirmed  
23  
24 with individual hospital medical records, showing that 73% of designated myocardial  
25  
26 infarctions were valid. The validation study was updated in 2013 with a value of 93%.<sup>16</sup>  
27  
28 The validation study on mortality data has not been conducted.  
29  
30  
31  
32  
33  
34  
35  
36

### 37 **Statistical analysis**

38  
39 First, we examined relationships between smoking status and established ASCVD risk  
40  
41 factors at baseline. In considering continuous ASCVD risk factors, we used ordinary  
42  
43 least squares regression and coded smoking quantity as an ordinal variable. In this study,  
44  
45 the Mantel Haenszel method was applied for dichotomous variables.<sup>17</sup>  
46  
47  
48

49 To assess the independent effects of smoking on the risk of IHD, stroke, and ASCVD,  
50  
51 Cox proportional hazards models were used, controlling for age and the confounding  
52  
53 variables such as hypertension, diabetes, high cholesterol, and alcohol drinking. The  
54  
55 proportional assumption was also tested utilizing Schoenfeld residuals, and the survival  
56  
57  
58

1  
2  
3  
4 curve according to smoking status was plotted using the life-table method. We used  
5  
6 Levins formula for calculating population attributable risk (PAR).<sup>18</sup> In additional  
7  
8 analyses, we excluded all events that had occurred in the first 4 years of follow-up.  
9  
10 These analyses ensured sensitivity in our results. In all analyses, a two-sided  
11  
12 significance level of 0.05 was used.  
13  
14  
15  
16  
17  
18  
19

### 20 **Patient and Public Involvement**

21  
22 Patients and or public were not involved.  
23  
24  
25  
26  
27  
28  
29

### 30 **RESULTS**

31  
32 The average age of the study participants was  $26.7 \pm 2.0$  (SD) years. Among the  
33  
34 118,531 men, 78,455 (66.2%) were current smokers, 15,126 (12.8%) were ex-smokers,  
35  
36 and 92,403 (15.4) had hypertension. For total cholesterol, 94,413 (79.7%) had a total  
37  
38 serum cholesterol level < 200 mg/dL, 19,764 (16.6%) had a borderline level of 200-240  
39  
40 mg/dL, and 4,444 (3.8%) had a level of 240 mg/dL or higher. In terms of amount of  
41  
42 smoking, 28.9% smoked more than 20 cigarettes per day while 45.5% and 25.6% of  
43  
44 current smokers smoked 1 to 9 and 10 to 19 cigarettes per day, respectively. Among  
45  
46 current smokers, 92.0% smoked for less than 10 years while 7.6% and 0.4% of current  
47  
48 smokers smoked for 10 to 19 years and more than 20 years, respectively.  
49  
50  
51  
52  
53

54 Population characteristics by smoking status are presented in Table 1. After adjusting  
55  
56 for age, current smokers had a significantly higher body mass index (P for trend =  
57  
58  
59  
60

0.0056), higher consumption of alcohol drinking (P for trend <.0001), and higher prevalence of diabetes (P for trend = 0.0060) than nonsmokers.

The mean length of follow-up was 23 years, for a total of 5,191,823 person-years. During this period, 2,786 (90 fatal) IHD cases (53/100,000 person year), stroke cases 2,368 (126 fatal) (45.4/100,000 person year), and 6,368 ASCVD cases (306 fatal) (122.7/100,000 person year) occurred

The independent effects of smoking on IHD, stroke, and ASCVD were analyzed controlling for confounding factors through Cox proportional hazards models, as shown in Table 2. The hazard ratios (HR) relating to IHD for current smokers were 1.5 (P <.0001), and those of ex-smokers were 1.0 (P=0.8567). The HR of stroke was 1.4 (P <.0001) for current smokers and 1.1 (P = 0.5008) on ex-smokers.

Compared to nonsmokers, the HR for any ASCVD event was 1.4 (P < 0.0001) in current smokers and 1.1 in ex-smokers (P = 0.1406). Figure 2 shows the survival probability by smoking history (never, former, 1-9, 10-19, ≥ 20 cigarette per day among current smokers) and the corresponding unadjusted association with ASCVD. The overall results demonstrated that smoking among young men increased the risk for ASCVD relative to nonsmokers. After adjusting for age and traditional ASCVD risk factors, the HRs for IHD and stroke were estimated for groups classified by amount of smoking (A and B in Figure 3) and duration of smoking (C and D in Figure 3). For IHD and stroke, the risk of events increased linearly with higher amount of cigarette per day (P for trend, <.0001 and <.0001, respectively) and longer duration of smoking (P for trend, <.0001 and <.0001, respectively).

1  
2  
3  
4 To examine whether serum total cholesterol levels could modify the effect of smoking  
5 on ASCVD, we divided the cohort participants into quartile of total cholesterol. The  
6 risks above were also found throughout the range of serum levels of cholesterol  
7 demonstrating that serum total cholesterol levels did not modify the effect of smoking  
8 on ASCVD (Figure 4).  
9  
10  
11  
12  
13  
14

15  
16 Estimated risk factor prevalence in current studies of smoking and other additional risk  
17 factors were used to estimate the PARs for IHD alone, stroke alone and total ASCVD  
18 (Table 3). For IHD, current smoking accounts for about 24.9% of events, and  
19 hypertension accounts for 8.1% of events. In the case of stroke, smoking was estimated  
20 to account for 20.9%, whilst hypertension was estimated to be responsible for 13.3% of  
21 stroke cases.  
22  
23  
24  
25  
26  
27  
28  
29  
30  
31  
32  
33

## 34 **DISCUSSION**

35  
36 Our study investigated the association between smoking and risk of ASCVD among  
37 Korean young men within a cohort study with a 23 year of follow-up. To our  
38 knowledge, this is the first study focusing on Korean young adults. In our study,  
39 smoking was the most crucial risk factor attributing to 20% of ASCVD mortality in  
40 middle age.  
41  
42  
43  
44  
45  
46  
47  
48

49 Diabetes, hypertension, and hyperlipidemia are well known risk factors for ASCVD<sup>10</sup>.  
50 However, for young adults with relatively low incidence of diabetes, hypertension and  
51 hyperlipidemia, smoking is the most important and an independent risk factor for  
52 predicting ASCVD in the present study. Furthermore, the high smoking rate among  
53  
54  
55  
56  
57  
58  
59  
60

1  
2  
3  
4 young people is important with respect to the development of middle-aged hypertension  
5  
6 and transition to ASCVD.<sup>19-20</sup> Thus, middle-aged ASCVD morbidity is likely  
7  
8 predominantly predicted by smoking in young adulthood.  
9

10  
11  
12 The body of research centered upon the health effects of smoking is steadily increasing,  
13  
14 with findings reported from many countries around the world. However, few studies  
15  
16 have examined the effect of smoking on ASCVD in young adults.<sup>21</sup> Here, we present  
17  
18 evidence that current smoking is an independent risk factor affecting the incidence of  
19  
20 IHD, stroke and ASCVD.  
21  
22

23  
24 These risk associations have been estimated across total serum cholesterol groups. A  
25  
26 cohort study in Hasayama Japan found that smoking showed positive association with  
27  
28 coronary heart disease in people with high levels of serum cholesterol above 180 mg /  
29  
30 dl, but not with people with low level of cholesterol less than 180 mg / dl.<sup>22-23</sup>  
31  
32 Afterward, six epidemiological studies were conducted. Among them, one study from  
33  
34 Puerto Rico Heart Health Program<sup>24</sup> showed similar results, but not all.<sup>7-11</sup> Of course,  
35  
36 all studies were conducted among adult populations. To the best of our knowledge, no  
37  
38 study has been done on young adults with much lower levels of serum cholesterol. In  
39  
40 addition, the high smoking rate among young adults is likely to be, even directly, linked  
41  
42 to high blood pressure among the adult population who developed ASCVD as a major  
43  
44 health problem.  
45  
46  
47  
48  
49

50  
51 In this study, the non-significant risk of ASCVD among ex-smokers can be interpreted  
52  
53 in two ways. First, this result may simply reflect the effect of smoking cessation. Most  
54  
55 previous studies have shown that the effects of smoking cessation are immediate in  
56  
57 CVD (most of the excess risk of vascular mortality due to smoking may be eliminated  
58  
59 rapidly upon cessation), while lung cancer occurs within 20 years<sup>25, 26</sup>. In particular,  
60  
most of the excess risk of vascular mortality due to smoking in women may be

1  
2  
3  
4 eliminated rapidly upon cessation and within 20 years for lung diseases.<sup>26</sup> Second,  
5 even if a number of young adult ex-smokers, aged 20-29 years, may have smoked  
6 continuously from adolescence, it is still a short term of smoking, compared to adults.  
7 Previous study shown that reducing adult smoking pays more immediate dividends,  
8 both in terms of health improvements and cost savings.<sup>27</sup> While present study lacks  
9 information on smoking duration of ex-smokers, current smokers who continued to  
10 smoke seem to have increased risk of CVD by 40%. Therefore, while the smoking  
11 duration of ex-smokers is unknown, it may be reasonable to consider the results were  
12 mainly affected by the smoking cessation. Further research on the effects of smoking  
13 cessation among young adults is necessary.  
14  
15  
16  
17

18 There are several studies regarding cardiovascular risk among young people. According  
19 to a study conducted by Bernaards et al.,<sup>28</sup> blood pressure and waist circumference were  
20 decreased by lowering weekly tobacco consumption in younger participants. However,  
21 they did not report the risk of developing cardiovascular disease events due to changes  
22 in smoking. This seems to be another significant topic relating to the health of young  
23 adults. Another study conducted by Morotti et al.<sup>21</sup> on young women with polycystic  
24 ovary syndrome (PCOS) reported an association between smoking habitude in lean  
25 PCOS patients, and the increase of soft markers of cardiovascular risk. For young adult  
26 African Americans, the association between cigarette smoking and carotid intima  
27 assuming the genetic variation of smokers was reported and the -930<sup>A/G</sup> polymorphism  
28 modified the association among young healthy adults.<sup>29</sup> The study on association  
29 between second hand smoking among childhood and cardiovascular event in adulthood  
30 was conducted and found that the carotid plaque risk in adulthood is increased in  
31 children whose parents had smoked.<sup>30-31</sup>  
32  
33  
34  
35  
36  
37  
38  
39  
40  
41  
42  
43  
44  
45  
46  
47  
48  
49

50  
51 This LCHS study has several strengths, such as high follow-up rates and a large,  
52 national sample. The large sample size of cohort allowed us to investigate the  
53 association of smoking with various levels of serum cholesterol. The civil servants and  
54  
55  
56  
57

1  
2  
3  
4 private school teachers who participated in this study accounted for about 11% of the  
5 total population in 1992. We did not compare the characteristics of the 89% population  
6 not included in the study. Therefore, this study will not represent the whole population.  
7  
8 Moreover, selection bias may be a potential issue, since the final sample contains a  
9 subset of over 118,531 young male adults (38.6%) out of 307,041 subjects initially  
10 selected for our study. We therefore urge conservative interpretations of our study  
11 results with regard to the general population.  
12  
13  
14  
15  
16  
17  
18  
19  
20

21 In conclusion, smoking is a leading cause of ASCVD among young adults in Korea, a  
22 country with a low total cholesterol level and a high smoking rate. Moreover, the  
23 association was not modified by total cholesterol level. Smoking among Korean young  
24 adult men was independently associated with increased risk of IHD, stroke and ASCVD.  
25  
26 The concentration of cholesterol in Korean men did not modify the effect of smoking  
27 on ASCVD. Therefore, smoking cessation on young adult smokers is essential to  
28 prevent CVD later in adult life. Moreover, clinical practice guidelines and policies  
29 should emphasize to treat nicotine addiction in young smokers.  
30  
31  
32  
33  
34  
35  
36  
37  
38  
39  
40  
41  
42  
43  
44  
45  
46  
47  
48  
49  
50  
51

52 **Acknowledgments:** We appreciate the assistance of the Korean National Health  
53 Insurance Service, which provided the data for this study.  
54  
55  
56  
57  
58  
59  
60

52 **Contributors:** Data analysis was undertaken by YJ and KJJ. The article was drafted by  
53 YJ. SL, JHB, SHJ, and SC substantially contributed to the conception or design of the  
54 work, revising the work, approved the final version to be published, and agreed to be  
55  
56  
57  
58  
59  
60

1  
2  
3  
4 accountable for all aspects of the work in ensuring that questions related to the accuracy  
5  
6 or integrity of any part of the work are appropriately investigated and resolved.  
7  
8  
9  
10  
11

12  
13 **Funding Sources:** This study was funded with a grant from the Korean Health  
14  
15 Technology R&D Project, Ministry of Health & Welfare, Republic of Korea  
16  
17 (HI14C2686). The funder had no role in the study design and data collection, in  
18  
19 analyzing and interpreting data, or in the decision to submit this work for publication  
20  
21  
22  
23  
24

25 **Conflict of interests:** None declared  
26  
27  
28  
29  
30

31 **Ethics approval:** The study proposal obtained an approval by the Institutional Review  
32  
33 Board of Human Research, Yonsei University (4-2001-0029).  
34  
35  
36

37 **Provenance and peer review:** Not commissioned; externally peer reviewed.  
38  
39  
40

41 **Data sharing statement:** No additional data are available.  
42  
43  
44  
45  
46  
47  
48  
49  
50  
51  
52  
53  
54  
55  
56  
57  
58  
59  
60



## REFERENCES

1. World Health Organization. Cardiovascular diseases (CVDs). Fact sheet. Updated May 2017. <http://www.who.int/mediacentre/factsheets/fs317/en/>. Visited at 3 March, 2018.
2. Jee SH, Samet JM, Ohrr H, Kim JH, Kim IS. Smoking and cancer risk in Korean men and women. *Cancer Causes Control*. 2004;15(4):341-8.
3. Yuan JM, Ross RK, Wang XL, Gao YT, Henderson BE, Yu MC. Morbidity and mortality in relation to cigarette smoking in Shanghai, China. *JAMA* 1996: 1646–50.
4. Liu B-Q, Peto R, Chen Z-M, et al. Emerging tobacco hazards in China: 1. Retrospective proportional mortality study of one million deaths. *Br Med J* 1998;317: 1411–22.
5. Niu S-R, Yang G-H, Chen Z-M, et al. Emerging tobacco hazards in China: 2. Early mortality results from a prospective study. *Br Med J* 1998;317: 1423–24.
6. Robertson TL, Kato H, Gordon T, Kagan A, Rhoads GG, Land CE, Worth RM, Belsky JL, Dock DS, Miyanishi M, Kawamoto S. Epidemiologic studies of coronary heart disease and stroke in Japanese men living in Japan, Hawaii and California. Coronary heart disease risk factors in Japan and Hawaii. *Am J Cardiol*. 1977;39(2):244-9. PubMed PMID: 835483.
7. Lawlor DA, Song YM, Sung J, Ebrahim S, Smith GD. The association of smoking and cardiovascular disease in a population with low cholesterol levels: a study of 648,346 men from the Korean national health system prospective cohort study. *Stroke*.

1  
2  
3  
4 2008;39(3):760-7. doi: 10.1161/STROKEAHA.107.494823. Epub 2008 Jan 31.

5  
6 PubMed PMID: 18239177.

7  
8  
9  
10 8. Hozawa A, Okamura T, Kadowaki T, Murakami Y, Nakamura K, Hayakawa T, Kita  
11 Y, Nakamura Y, Okayama A; Hirotsugu Ueshima for NIPPON DATA80 Research  
12 group. Is weak association between cigarette smoking and cardiovascular disease  
13 mortality observed in Japan explained by low total cholesterol? NIPPON DATA80. *Int*  
14 *J Epidemiol.* 2007 Oct;36(5):1060-7. Epub 2007 Sep 10. PubMed PMID: 17846054.  
15  
16  
17  
18

19  
20  
21  
22 9. Nakamura K, Barzi F, Huxley R, Lam TH, Suh I, Woo J, Kim HC, Feigin VL, Gu D,  
23 Woodward M; Asia Pacific Cohort Studies Collaboration. Does cigarette smoking  
24 exacerbate the effect of total cholesterol and high-density lipoprotein cholesterol on the  
25 risk of cardiovascular diseases? *Heart.* 2009;95(11):909-16. doi:  
26 10.1136/hrt.2008.147066. Epub 2009 Feb 5. PubMed PMID: 19196734.  
27  
28  
29  
30  
31  
32

33  
34 10. Jee SH, Suh I, Kim IS, Appel LJ. Smoking and atherosclerotic cardiovascular  
35 disease in men with low levels of serum cholesterol: the Korea Medical Insurance  
36 Corporation Study. *JAMA.* 1999;282(22):2149-55.  
37  
38  
39  
40

41  
42 11. Jee SH, Park J, Jo I, Lee J, Yun S, Yun JE, Jang Y. Smoking and atherosclerotic  
43 cardiovascular disease in women with lower levels of serum cholesterol.  
44 *Atherosclerosis.* 2007;190(2):306-12. Epub 2006 May 4.  
45  
46  
47  
48

49  
50 12. Chobanian AV, Bakris GL, Black HR, Cushman WC, Green LA, Izzo JL Jr, Jones  
51 DW, Materson BJ, Oparil S, Wright JT Jr, Roccella EJ; National Heart, Lung, and  
52 Blood Institute Joint National Committee on Prevention, Detection, Evaluation, and  
53 Treatment of High Blood Pressure; National High Blood Pressure Education Program  
54  
55  
56  
57  
58

1  
2  
3  
4 Coordinating Committee. The Seventh Report of the Joint National Committee on  
5 Prevention, Detection, Evaluation, and Treatment of High Blood Pressure: the JNC 7  
6 report. *JAMA*. 2003;289(19):2560-72. Epub 2003 May 14. Erratum in: *JAMA*. 2003 Jul  
7 9;290(2):197. PubMed PMID: 12748199.  
8  
9  
10  
11  
12

13  
14 13. The National Cholesterol Education Program. Report of the Expert Panel on Blood  
15 Cholesterol Levels in Children and Adolescents. NIH Publication No. 91-2732.  
16 Bethesda, MD; 1994.  
17  
18  
19  
20  
21

22  
23 14. National Diabetes Data Group. Report of the Expert Committee on the Diagnostic  
24 Classification of Diabetes. *Diabetes Care*. 1997;20(7):1183-97.  
25  
26

27  
28 15. Kimm H, Yun JE, Lee SH, et al. Validity of the diagnosis of acute myocardial  
29 infarction in Korean national medical health insurance claims data: the Korean Heart  
30 Study (1). *Korean Circ J* 2012;42:10-15.  
31  
32  
33

34  
35 16. Kim HY. Validity of the diagnosis of acute myocardial infarction in Korean  
36 national medical health insurance claims data: the Korean Heart Study [Master thesis].  
37 Yonsei University, Seoul, Korea, June 2013.  
38  
39  
40  
41

42  
43 17. Breslow NE, Day NE. Statistical methods in cancer research. Vol. 1: The analysis  
44 of case-control studies. Lyon, France: IARC Scientific Publication No. 32, pp. 146-50.  
45  
46  
47

48  
49 18. Levin ML. The occurrence of lung cancer in man. *Acta Intern Cancer* 1953;19:531.  
50

51  
52 19. Thut AB, Blizzard L, Schmidt MD, Luc PH, Granger RH, Dwyer T. The association  
53 between smoking and hypertension in a population-based sample of Vietnamese men. *J*  
54 *Hypertens*. 2010; 28: 245 - 50.  
55  
56  
57

- 1  
2  
3  
4 20. Kim BJ, Seo DC, Kim BS, Kang JH. Relationship between cotinine-verified  
5 smoking status and incidence of hypertension in 74,743 Korean adults. *Circ J*. 2018 Feb  
6  
7 28. doi: 10.1253/circj.CJ-17-1188. [Epub ahead of print].  
8  
9  
10  
11 21. Morotti E, Battaglia B, Fabbri R, Paradisi R, Venturoli S, Battaglia C. Cigarette  
12 smoking and cardiovascular risk in young women with polycystic ovary syndrome. *Int*  
13 *J Fertil Steril*. 2014;7(4):301-12. Epub 2013 Dec 22.  
14  
15  
16  
17 22. Kiyohara Y, Ueda K, Fujishima M. Smoking and cardiovascular disease in the  
18 general population in Japan. *J Hypertens* 1990;8(Suppl 5):S9–S15.  
19  
20  
21 23. Fujishima M, Kiyohara Y, Ueda K, Hasuo Y, Kato I, Iwamoto H. Smoking as  
22 cardiovascular risk factor in low cholesterol population: the Hisayama Study. *Clin Exp*  
23 *Hypertens A*. 1992;14(1-2):99-108.  
24  
25  
26 24. Gordon T, Garcia-Palmier MR, Kagan A, Kannel WB, Schiffman J. Differences in  
27 coronary heart disease in Framingham, Honolulu and Puerto Rico. *J Chronic Dis*.  
28 1974;27:329–44.  
29  
30  
31 25. Thun, M. J., Day-Lally, C., Myers, D. G., Calle, E. E., Flanders, W., Zhu, B., ... &  
32 Heath, C. W. (1982). Trends in tobacco smoking and mortality from cigarette use in  
33 Cancer Prevention Studies I (1959 through 1965) and II (1982 through 1988). National  
34 Cancer institute, smoking and tobacco control, monograph, 8.  
35  
36  
37 26. Kenfield SA, Stampfer MJ, Rosner BA, Colditz GA. Smoking and smoking  
38 cessation in relation to mortality in women. *JAMA*. 2008;299(17):2037-47.  
39  
40  
41  
42 27. Lightwood JM, Glantz SA. Short-term economic and health benefits of smoking  
43  
44  
45  
46  
47  
48  
49  
50  
51  
52  
53  
54  
55  
56  
57  
58  
59  
60

1  
2  
3  
4 cessation: myocardial infarction and stroke. *Circulation*. 1997;96(4):1089-96.  
5  
6

7 28. Bernaards CM1, Twisk JW, Snel J, van Mechelen W, Kemper HC. In a prospective  
8 study in young people, associations between changes in smoking behavior and risk  
9 factors for cardiovascular disease were complex. *J Clin Epidemiol*. 2005  
10 Nov;58(11):1165-71.  
11  
12  
13  
14  
15

16 29. Murtaugh KH, Borde-Perry WC, Campbell KL, Gidding SS, Falkner B. Obesity,  
17 smoking, and multiple cardiovascular risk factors in young adult African Americans.  
18  
19  
20  
21  
22  
23  
24  
25  
26  
27  
28  
29  
30  
31  
32  
33  
34  
35  
36  
37  
38  
39  
40  
41  
42  
43  
44  
45  
46  
47  
48  
49  
50  
51  
52  
53  
54  
55  
56  
57  
58  
59  
60

30. West HW, Juonala M, Gall SL, Kähönen M, Laitinen T, Taittonen L, Viikari JS,  
aitakari OT, Magnussen CG. Exposure to parental smoking in childhood is associated  
with increased risk of carotid atherosclerotic plaque in adulthood: the Cardiovascular  
Risk in Young Finns Study. *Circulation*. 2015 Apr 7;131(14):1239-46. doi:  
10.1161/CIRCULATIONAHA.114.013485. Epub 2015 Mar 23.

31. Roy MP, Steptoe A, Kirschbaum C. Association between smoking status and  
cardiovascular and cortisol stress responsivity in healthy young men. *Int J Behav Med*.  
1994;1(3):264-83.

## Figure legends

Figure 1. Timeline for data collection in the Korean Life Course Health Study

1  
2  
3  
4  
5  
6  
7 Figure 2. Survival of atherosclerotic cardiovascular disease event by smoking history in  
8 Korean young adult men, 1992-2015  
9  
10

11  
12  
13  
14  
15 Figure 3. Hazard ratios with 95% confidence intervals for from ischemic heart disease,  
16 and stroke by cigarette per day and duration of smoking  
17  
18  
19

20  
21  
22  
23 Figure 4. Hazard ratios with 95% confidence intervals for ischemic heart disease and  
24 stroke by total cholesterol groups of smokers compared with nonsmokers: Each group  
25 of total cholesterol levels are as follows: first, 149 mg/dl; second, 150-169 mg/dL; third,  
26 170-194 mg/dL; fourth,  $\geq 195$  mg/dL. The reference group is non-smokers in each  
27 quartile of total cholesterol.  
28  
29  
30  
31  
32  
33  
34  
35  
36  
37  
38  
39  
40  
41  
42  
43  
44  
45  
46  
47  
48  
49  
50  
51  
52  
53  
54  
55  
56  
57  
58  
59  
60

Table 1. Baseline Characteristics of the Korean Life Course Health Study, 1992-1994, According to Smoking Status\*

| Characteristic                     | Nonsmokers<br>(n=24,950) | Ex-smokers<br>(n=15,126) | No. of cigarettes per day among current smokers |                     |                   | P for<br>Trend†‡ |
|------------------------------------|--------------------------|--------------------------|-------------------------------------------------|---------------------|-------------------|------------------|
|                                    |                          |                          | 1-9<br>(n=22,642)                               | 10-19<br>(n=35,690) | ≥20<br>(n=20,123) |                  |
| Age, year                          | 26.6 (2.1)               | 26.9 (1.9)               | 26.6 (2.0)                                      | 26.8 (1.9)          | 26.8 (1.9)        | 0.1622           |
| Systolic Blood Pressure, mmHg      | 120.4 (11.6)             | 120.0 (11.8)             | 119.8 (11.6)                                    | 120.1 (11.6)        | 120.3 (11.6)      | 0.2558           |
| Diastolic Blood Pressure mmHg      | 78.0 (9.0)               | 77.7 (9.1)               | 77.5 (9.0)                                      | 77.8 (9.0)          | 78.0 (9.0)        | 0.1122           |
| Total cholesterol, mg/dL           | 173.4 (32.9)             | 173.4 (32.6)             | 172.9 (33.1)                                    | 174.5 (33.4)        | 177.2 (34.4)      | 0.9543           |
| Body mass index, kg/m <sup>2</sup> | 22.3 (2.4)               | 22.4 (2.4)               | 22.3 (2.4)                                      | 22.5 (2.5)          | 22.9 (2.6)        | 0.0056           |
| Fasting serum glucose, mg/dL       | 86.7 (13.3)              | 86.6 (13.5)              | 86.2 (14.1)                                     | 86.4 (14.1)         | 86.6 (15.3)       | 0.4821           |
| Alcohol consumption, g per day     | 7.3 (17.7)               | 9.7 (19.7)               | 12.2 (22.6)                                     | 14.5 (25.1)         | 20.4 (36.1)       | <.0001           |
| Conditions, %                      |                          |                          |                                                 |                     |                   |                  |
| Hypertension†                      | 15.7                     | 15.1                     | 14.5                                            | 15.6                | 15.7              | 0.7987           |
| Hypercholesterolemia‡              | 3.4                      | 3.3                      | 3.3                                             | 3.9                 | 4.7               | 0.0743           |
| Diabetes§                          | 0.7                      | 0.8                      | 0.9                                             | 0.9                 | 1.0               | 0.0060           |
| Alcohol use                        | 61.2                     | 81.3                     | 88.2                                            | 88.3                | 86.9              | 0.1035           |
| Physical activity                  | 24.9                     | 26.8                     | 22.9                                            | 17.5                | 13.0              | <.0001           |

\*Data are expressed as means (SD) unless otherwise indicated; †Systolic blood pressure of at least 140 mmHg and/or diastolic blood pressure of at least

1  
2  
3 90 mmHg; ‡Total cholesterol level of at least 6.21 mmol/L (240 mg/dL); § Fasting serum glucose value of at least 6.99 mmol/L (126 mg/L); || Consumption  
4 of Soju which is a colorless distilled beverage of Korean origin; ¶¶Testing for trend across nonsmokers and current smokers; ex-smokers were excluded.  
5  
6  
7  
8  
9  
10  
11  
12  
13  
14  
15  
16  
17  
18  
19  
20  
21  
22  
23  
24  
25  
26  
27  
28  
29  
30  
31  
32  
33  
34  
35  
36  
37  
38  
39  
40  
41  
42  
43  
44  
45  
46

For peer review only



Table 2. Risk of Morbidity from Ischemic Heart Disease, Cerebrovascular Disease, and Atherosclerotic Cardiovascular Disease in Korean Men in the Korean Life Course Health Study, 1992-2015\*

| Variables and Categories    | Ischemic Heart Disease |        | Cerebrovascular Disease |        | Atherosclerotic Cardiovascular Disease |        |
|-----------------------------|------------------------|--------|-------------------------|--------|----------------------------------------|--------|
|                             | HR (95% CI)            | P      | HR (95% CI)             | P      | HR (95% CI)                            | P      |
| Age (5-year age group)      | 1.4 (1.2 – 1.6)        | <.0001 | 1.4 (1.3 – 1.6)         | <.0001 | 1.3 (1.2 – 1.4)                        | <.0001 |
| Cigarette smoking           |                        |        |                         |        |                                        |        |
| Ex-smoker                   | 1.0 (0.9 – 1.2)        | 0.8567 | 1.1 (0.9 – 1.3)         | 0.5008 | 1.1 (1.0 – 1.2)                        | 0.1406 |
| Current smoker              | 1.5 (1.3 – 1.6)        | <.0001 | 1.4 (1.2 – 1.6)         | <.0001 | 1.4 (1.3 – 1.5)                        | <.0001 |
| Blood Pressure†             |                        |        |                         |        |                                        |        |
| High normal                 | 1.2 (1.1 – 1.4)        | <.0001 | 1.2 (1.0 – 1.3)         | 0.0152 | 1.2 (1.1 – 1.3)                        | <.0001 |
| Stage 1 hypertension        | 1.6 (1.4 – 1.8)        | <.0001 | 1.7 (1.5 – 2.0)         | <.0001 | 1.7 (1.5 – 1.8)                        | <.0001 |
| Stage 2 hypertension        | 2.0 (1.6 – 2.5)        | <.0001 | 3.2 (2.5 – 4.0)         | <.0001 | 2.9 (2.5 – 3.3)                        | <.0001 |
| Total cholesterol‡          |                        |        |                         |        |                                        |        |
| Borderline-high cholesterol | 1.4 (1.3 – 1.6)        | <.0001 | 1.4 (1.3 – 1.6)         | <.0001 | 1.4 (1.3 – 1.5)                        | <.0001 |
| High cholesterol            | 2.5 (2.1 – 2.8)        | <.0001 | 1.7 (1.4 – 2.1)         | <.0001 | 2.1 (1.8 – 2.3)                        | <.0001 |
| Fasting blood sugar§        |                        |        |                         |        |                                        |        |
| Diabetes                    | 1.3 (0.9 – 1.9)        | 0.1375 | 1.6 (1.1 – 2.3)         | 0.0222 | 1.5 (1.2 – 1.9)                        | 0.0008 |
| Physical activity           |                        |        |                         |        |                                        |        |
| No exercise                 | 1.1 (1.0 – 1.3)        | 0.0122 | 1.1 (1.0 – 1.3)         | 0.2156 | 1.1 (1.0 – 1.3)                        | 0.0075 |

\*Hazard ratio (HRs) and 95% confidence intervals (CIs) from multivariable Cox proportional hazards models. †The reference category is normal (systolic

1  
2  
3 blood pressure<140 mmHg and diastolic blood pressure<90mm Hg). ‡ The reference category is desirable (serum cholesterol level, < 5.17 mmol/L [200  
4 mg/dL]). §The reference category is a fasting serum glucose level of less than 6.99 mmol/L (126 mg/dL).  
5  
6  
7  
8  
9  
10  
11  
12  
13  
14  
15  
16  
17  
18  
19  
20  
21  
22  
23  
24  
25  
26  
27  
28  
29  
30  
31  
32  
33  
34  
35  
36  
37  
38  
39  
40  
41  
42  
43  
44  
45  
46

For peer review only

Table 3. Population Attributable Risks (PARs) and 95% Confidence Intervals (CIs) From Smoking and Other Risk Factors of Ischemic Heart Disease, Cerebrovascular Disease, and Atherosclerotic Cardiovascular Disease in Korean Men: The Korean Life Course Health Study

| Variables and Categories    | Prevalence<br>% | Ischemic Heart Disease<br>PAR (95% CI) | Cerebrovascular Disease<br>PAR (95% CI) | Atherosclerotic Cardiovascular Disease<br>PAR (95% CI) |
|-----------------------------|-----------------|----------------------------------------|-----------------------------------------|--------------------------------------------------------|
| <b>Smoking</b>              |                 |                                        |                                         |                                                        |
| Current smoker              | 66.2            | 24.9 (16.6 – 28.4)                     | 20.9 (11.7 -28.4)                       | 20.9 (16.5 – 24.9)                                     |
| <b>Blood Pressure*</b>      |                 |                                        |                                         |                                                        |
| Hypertension                | 22.0            | 8.1 (6.2 – 9.9)                        | 13.3 (9.9 – 14.9 )                      | 9.9 (9.9 – 11.7)                                       |
| <b>Total cholesterol†</b>   |                 |                                        |                                         |                                                        |
| Borderline                  | 16.6            | 6.2 (4.7 – 9.1)                        | 6.2 (4.7 – 7.7)                         | 6.2 (4.7 – 7.6)                                        |
| High                        | 3.8             | 5.4 (4.0 – 6.4)                        | 4.0 (2.9 – 4.7)                         | 4.0 (2.9 – 4.7)                                        |
| <b>Fasting blood sugar‡</b> |                 |                                        |                                         |                                                        |
| Diabetes                    | 0.9             | 0.3 (-0.9 – 0.8)                       | 0.5 (0.08 – 1.1)                        | 0.4 (0.2 – 0.8)                                        |
| <b>Physical activity</b>    |                 |                                        |                                         |                                                        |
| No exercise                 | 0.8             | 7.4 (0 – 19.3)                         | 7.4 (0 – 19.3)                          | 7.4 (0 – 19.3)                                         |

\*The reference category is normal (systolic blood pressure < 140 mmHg and diastolic blood pressure < 90mm Hg). †The reference category is desirable (serum cholesterol level < 5.17 mmol/L [200 mg/dL]). ‡ The reference category is a fasting serum glucose level of less than 6.99 mmol/L (126 mg/dL).

Figure 1



69x33mm (300 x 300 DPI)

1  
2  
3  
4  
5  
6  
7  
8  
9  
10  
11  
12  
13  
14  
15  
16  
17  
18  
19  
20  
21  
22  
23  
24  
25  
26  
27  
28  
29  
30  
31  
32  
33  
34  
35  
36  
37  
38  
39  
40  
41  
42  
43  
44  
45  
46  
47  
48  
49  
50  
51  
52  
53  
54  
55  
56  
57  
58  
59  
60



Figure 2

254x190mm (300 x 300 DPI)

Figure 3.

A. Ischemic Heart Disease



B. Ischemic Heart Disease



C. Stroke



D. Stroke



E. ASCVD

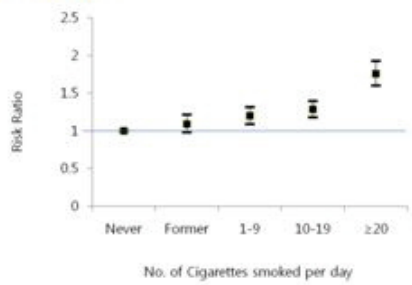

F. ASCVD

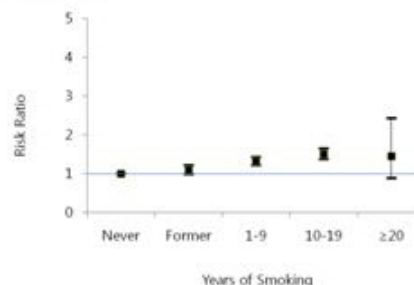

46x53mm (300 x 300 DPI)

1  
2  
3  
4  
5  
6  
7  
8  
9  
10  
11  
12  
13  
14  
15  
16  
17  
18  
19  
20  
21  
22  
23  
24  
25  
26  
27  
28  
29  
30  
31  
32  
33  
34  
35  
36  
37  
38  
39  
40  
41  
42  
43  
44  
45  
46  
47  
48  
49  
50  
51  
52  
53  
54  
55  
56  
57  
58  
59  
60

Figure 4.



46x94mm (300 x 300 DPI)

Title: *smoking is the first leading cause of cardiovascular disease in Young Men.*

STROBE Statement—Checklist of items that should be included in reports of *cohort studies*

|                              | Item No | Recommendation                                                                                                                                                                                                                                                                                                                                                                                                                                 |
|------------------------------|---------|------------------------------------------------------------------------------------------------------------------------------------------------------------------------------------------------------------------------------------------------------------------------------------------------------------------------------------------------------------------------------------------------------------------------------------------------|
| <b>Title and abstract</b>    | ①       | (a) Indicate the study's design with a commonly used term in the title or the abstract <i>Page 3</i><br>(b) Provide in the abstract an informative and balanced summary of what was done and what was found <i>page 3</i>                                                                                                                                                                                                                      |
| <b>Introduction</b>          |         |                                                                                                                                                                                                                                                                                                                                                                                                                                                |
| Background/rationale         | ②       | Explain the scientific background and rationale for the investigation being reported <i>page 5</i>                                                                                                                                                                                                                                                                                                                                             |
| Objectives                   | ③       | State specific objectives, including any prespecified hypotheses <i>page 6, para 1.</i>                                                                                                                                                                                                                                                                                                                                                        |
| <b>Methods</b>               |         |                                                                                                                                                                                                                                                                                                                                                                                                                                                |
| Study design                 | ④       | Present key elements of study design early in the paper <i>Page 6, para 2</i>                                                                                                                                                                                                                                                                                                                                                                  |
| Setting                      | ⑤       | Describe the setting, locations, and relevant dates, including periods of recruitment, exposure, follow-up, and data collection <i>page 6-7.</i>                                                                                                                                                                                                                                                                                               |
| Participants                 | ⑥       | (a) Give the eligibility criteria, and the sources and methods of selection of participants. Describe methods of follow-up <i>page 6, page 8</i><br>(b) For matched studies, give matching criteria and number of exposed and unexposed                                                                                                                                                                                                        |
| Variables                    | ⑦       | Clearly define all outcomes, exposures, predictors, potential confounders, and effect modifiers. Give diagnostic criteria, if applicable <i>page 7, para 3, page 8</i>                                                                                                                                                                                                                                                                         |
| Data sources/<br>measurement | ⑧*      | For each variable of interest, give sources of data and details of methods of assessment (measurement). Describe comparability of assessment methods if there is more than one group <i>page 6, page 7</i>                                                                                                                                                                                                                                     |
| Bias                         | ⑨       | Describe any efforts to address potential sources of bias <i>page 14.</i>                                                                                                                                                                                                                                                                                                                                                                      |
| Study size                   | ⑩       | Explain how the study size was arrived at <i>page 7</i>                                                                                                                                                                                                                                                                                                                                                                                        |
| Quantitative variables       | ⑪       | Explain how quantitative variables were handled in the analyses. If applicable, describe which groupings were chosen and why <i>page 8</i>                                                                                                                                                                                                                                                                                                     |
| Statistical methods          | ⑫       | (a) Describe all statistical methods, including those used to control for confounding <i>page 9</i><br>(b) Describe any methods used to examine subgroups and interactions<br>(c) Explain how missing data were addressed<br>(d) If applicable, explain how loss to follow-up was addressed <i>page 8</i><br>(e) Describe any sensitivity analyses <i>page 9-10</i>                                                                            |
| <b>Results</b>               |         |                                                                                                                                                                                                                                                                                                                                                                                                                                                |
| Participants                 | ⑬*      | (a) Report numbers of individuals at each stage of study—eg numbers potentially eligible, examined for eligibility, confirmed eligible, included in the study, completing follow-up, and analysed <i>page 10</i><br>(b) Give reasons for non-participation at each stage<br>(c) Consider use of a flow diagram <i>page 7. (Figure 1)</i>                                                                                                       |
| Descriptive data             | ⑭*      | (a) Give characteristics of study participants (eg demographic, clinical, social) and information on exposures and potential confounders <i>page 10</i><br>(b) Indicate number of participants with missing data for each variable of interest<br>(c) Summarise follow-up time (eg, average and total amount) <i>page 10 (23 years of follow-up)</i>                                                                                           |
| Outcome data                 | ⑮*      | Report numbers of outcome events or summary measures over time <i>page 10.</i>                                                                                                                                                                                                                                                                                                                                                                 |
| Main results                 | ⑯       | (a) Give unadjusted estimates and, if applicable, confounder-adjusted estimates and their precision (eg, 95% confidence interval). Make clear which confounders were adjusted for and why they were included <i>page 10, para 1 (Table 2)</i><br>(b) Report category boundaries when continuous variables were categorized<br>(c) If relevant, consider translating estimates of relative risk into absolute risk for a meaningful time period |



|   |                          |    |                                                                                                                                                                            |                    |
|---|--------------------------|----|----------------------------------------------------------------------------------------------------------------------------------------------------------------------------|--------------------|
| 1 | Other analyses           | 17 | Report other analyses done—eg analyses of subgroups and interactions, and sensitivity analyses                                                                             | page 11 (Figure 4) |
| 2 | <b>Discussion</b>        |    |                                                                                                                                                                            |                    |
| 3 | Key results              | 18 | Summarise key results with reference to study objectives                                                                                                                   | page 12 para 2     |
| 4 | Limitations              | 19 | Discuss limitations of the study, taking into account sources of potential bias or imprecision. Discuss both direction and magnitude of any potential bias                 | page 14, para 2.   |
| 5 | Interpretation           | 20 | Give a cautious overall interpretation of results considering objectives, limitations, multiplicity of analyses, results from similar studies, and other relevant evidence | page 14            |
| 6 | Generalisability         | 21 | Discuss the generalisability (external validity) of the study results                                                                                                      | page 14            |
| 7 | <b>Other information</b> |    |                                                                                                                                                                            |                    |
| 8 | Funding                  | 22 | Give the source of funding and the role of the funders for the present study and, if applicable, for the original study on which the present article is based              | page 15            |

\*Give information separately for exposed and unexposed groups.

**Note:** An Explanation and Elaboration article discusses each checklist item and gives methodological background and published examples of transparent reporting. The STROBE checklist is best used in conjunction with this article (freely available on the Web sites of PLoS Medicine at <http://www.plosmedicine.org/>, Annals of Internal Medicine at <http://www.annals.org/>, and Epidemiology at <http://www.epidem.com/>). Information on the STROBE Initiative is available at <http://www.strobe-statement.org>.
